# Supplementary material
Source: publisher figshare collection journal article supplement (https://gsajournals.figshare.com/ndownloader/files/16411766)
Supplement: Supplementary file 1 [file 16411766]

## Sheet: Ler_35SULT1
Table S4. Genes differentially expressed between Ler and 35S:ULT1 IFM apices, p ≤ 0.05, FC ≥ 1.5
Array element	ID	Locus	Description	logFC	FC, 35S:ULT1 IFM	AveExpr(log2)	AveExpresn	t	p-value	adj. p-value
253811_at	8911	AT4G28190	ULT1 (ULTRAPETALA1); DNA binding	4.17572	18.0725	10.5577	1507.25	65.8098	4.23588e-13	9.66205e-09
266746_s_at	21846	AT2G02930;AT4G02520	[AT2G02930, ATGSTF3 (GLUTATHIONE S-TRANSFERASE 16); glutathione transferase];[AT4G02520, ATGSTF2 (Arabidopsis thaliana Glutathione S-transferase (class phi) 2); glutathione transferase]	3.9103	15.0355	8.01791	259.198	20.9336	8.88677e-09	4.45356e-06
257284_at	12384	AT3G29650	CACTA-like transposable element family member	3.89261	14.8522	6.14664	70.8472	51.0298	3.90087e-12	4.44895e-08
248545_at	3645	AT5G50260	cysteine proteinase, putative	3.83545	14.2753	6.98593	126.758	33.3905	1.56724e-10	5.10697e-07
266385_at	21485	AT2G14610	PR1 (PATHOGENESIS-RELATED GENE 1)	3.65235	12.5739	7.79612	222.263	28.032	7.14835e-10	1.16467e-06
258327_at	13427	AT3G22640	cupin family protein	3.5733	11.9034	7.02418	130.163	34.47	1.18867e-10	4.8177e-07
251625_at	6725	AT3G57260	BGL2 (PATHOGENESIS-RELATED PROTEIN 2); glucan 1,3-beta-glucosidase/ hydrolase, hydrolyzing O-glycosyl compounds	3.509	11.3845	7.97679	251.914	30.211	3.73593e-10	7.74695e-07
265983_at	21083	AT2G18550	ATHB21/HB-2 (homeobox-2); DNA binding / transcription factor	3.42963	10.7751	7.11416	138.54	34.217	1.26726e-10	4.8177e-07
250445_at	5545	AT5G10760	aspartyl protease family protein	3.32371	10.0124	6.66933	101.781	29.064	5.22577e-10	9.16921e-07
264346_at	19446	AT1G12010	1-aminocyclopropane-1-carboxylate oxidase, putative / ACC oxidase, putative	3.2685	9.63643	7.44588	174.354	16.0711	8.50755e-08	1.67291e-05
259272_at	14372	AT3G01290	band 7 family protein	3.18242	9.0783	6.96604	125.022	19.1006	1.95061e-08	7.06245e-06
262832_s_at	17932	AT1G14870;AT1G14880	[AT1G14870, similar to unknown protein [Arabidopsis thaliana] (TAIR:AT5G35525.1); similar to Os02g0579800 [Oryza sativa (japonica cultivar-group)] (GB:NP_001047231.1); similar to Uncharacterized Cys-rich domain [Medicago truncatula] (GB:ABE80519.1); similar to Os03g0830500 [Oryza sativa (japonica cultivar-group)] (GB:NP_001051787.1); contains InterPro domain Protein of unknown function Cys-rich; …	2.97289	7.85108	8.6883	412.513	21.599	6.79025e-09	4.4253e-06
266070_at	21170	AT2G18660	expansin family protein (EXPR3)	2.93378	7.64111	7.70443	208.576	20.6509	9.98779e-09	4.56692e-06
256109_at	11209	AT1G16950	transmembrane protein	2.9287	7.61426	6.54941	93.6632	18.2669	2.85752e-08	9.10014e-06
263475_at	18575	AT2G31945	similar to unknown protein [Arabidopsis thaliana] (TAIR:AT1G05575.1); similar to hypothetical protein [Oryza sativa (japonica cultivar-group)] (GB:BAD38225.1); similar to Os06g0207200 [Oryza sativa (japonica cultivar-group)] (GB:NP_001057099.1); similar to Os02g0774200 [Oryza sativa (japonica cultivar-group)] (GB:NP_001048273.1)	2.88652	7.39483	6.53751	92.8936	24.694	2.14049e-09	2.39373e-06
249454_at	4554	AT5G39520	similar to unknown protein [Arabidopsis thaliana] (TAIR:AT5G39530.1); similar to hypothetical protein MtrDRAFT_AC119412g1v1 [Medicago truncatula] (GB:ABE86761.1)	2.83826	7.15157	7.23013	150.136	15.9147	9.24407e-08	1.75714e-05
258809_at	13909	AT3G04070	ANAC047 (Arabidopsis NAC domain containing protein 47); transcription factor	2.69883	6.49274	7.5624	189.02	24.6108	2.20378e-09	2.39373e-06
256787_at	11887	AT3G13790	ATBFRUCT1/ATCWINV1 (ARABIDOPSIS THALIANA CELL WALL INVERTASE 1); beta-fructofuranosidase/ hydrolase, hydrolyzing O-glycosyl compounds	2.67032	6.36571	7.44514	174.265	35.0249	1.03459e-10	4.8177e-07
251428_at	6528	AT3G60140	DIN2 (DARK INDUCIBLE 2); hydrolase, hydrolyzing O-glycosyl compounds	2.5986	6.05699	5.86353	58.2235	12.793	5.81143e-07	6.16553e-05
264433_at	19533	AT1G61810	BGLU45; hydrolase, hydrolyzing O-glycosyl compounds	2.57912	5.97576	7.65202	201.135	19.1328	1.92268e-08	7.06245e-06
256300_at	11400	AT1G69490	NAP (NAC-LIKE, ACTIVATED BY AP3/PI); transcription factor	2.40019	5.27871	8.87323	468.932	27.32	8.93225e-10	1.3583e-06
259925_at	15025	AT1G75040	PR5 (PATHOGENESIS-RELATED GENE 5)	2.39651	5.26526	8.38614	334.565	30.2851	3.65733e-10	7.74695e-07
265615_at	20715	AT2G25450	GH-OH; 2-oxoglutarate-dependent dioxygenase, putative	2.38856	5.23634	6.69511	103.616	29.732	4.29136e-10	8.15716e-07
252345_at	7445	AT3G48640	similar to unknown protein [Arabidopsis thaliana] (TAIR:AT5G66670.2)	2.37878	5.20097	6.55454	93.997	20.8045	9.37181e-09	4.45356e-06
258063_at	13163	AT3G14620	CYP72A8 (cytochrome P450, family 72, subfamily A, polypeptide 8); oxygen binding	2.32757	5.01959	7.72401	211.426	12.6634	6.3269e-07	6.48137e-05
262119_s_at	17219	AT1G02930;AT1G02920	[AT1G02930, ATGSTF6 (EARLY RESPONSIVE TO DEHYDRATION 11); glutathione transferase];[AT1G02920, ATGSTF7 (GLUTATHIONE S-TRANSFERASE 11); glutathione transferase]	2.31971	4.9923	8.58861	384.972	10.1486	3.92099e-06	0.00021761
245329_at	429	AT4G14365	zinc finger (C3HC4-type RING finger) family protein / ankyrin repeat family protein	2.2986	4.91979	6.14651	70.8408	18.2557	2.87247e-08	9.10014e-06
245148_at	248	AT2G45220	pectinesterase family protein	2.2771	4.84701	6.52828	92.3014	16.5403	6.6622e-08	1.4612e-05
255479_at	10579	AT4G02380	SAG21 (SENESCENCE-ASSOCIATED GENE 21)	2.15959	4.46788	8.6275	395.49	22.2471	5.26461e-09	3.63897e-06
246279_at	1379	AT4G36740	ATHB40 (ARABIDOPSIS THALIANA HOMEOBOX PROTEIN 40); DNA binding / transcription factor	2.14724	4.42979	6.81586	112.662	20.8206	9.30978e-09	4.45356e-06
264580_at	19680	AT1G05340	similar to unknown protein [Arabidopsis thaliana] (TAIR:AT2G32210.1); similar to conserved hypothetical protein [Medicago truncatula] (GB:ABD32591.1)	2.11089	4.31958	7.61931	196.627	19.0138	2.02818e-08	7.22855e-06
260568_at	15668	AT2G43570	chitinase, putative	2.07018	4.19938	6.22394	74.7469	13.6704	3.3353e-07	4.23019e-05
265511_at	20611	AT2G05540	glycine-rich protein	2.0436	4.12273	11.6899	3303.69	15.2877	1.29948e-07	2.22866e-05
249754_at	4854	AT5G24530	oxidoreductase, 2OG-Fe(II) oxygenase family protein	1.98426	3.95661	7.68768	206.169	17.5946	3.93584e-08	1.14054e-05
252234_at	7334	AT3G49780	ATPSK4 (PHYTOSULFOKINE 4 PRECURSOR); growth factor	1.97013	3.91804	6.45988	88.0275	15.2148	1.35314e-07	2.28631e-05
245317_at	417	AT4G15610	integral membrane family protein	1.91862	3.78062	6.85871	116.059	16.2789	7.62814e-08	1.5818e-05
253161_at	8261	AT4G35770	SEN1 (DARK INDUCIBLE 1)	1.90985	3.75771	11.7894	3539.66	32.2554	2.11637e-10	6.03429e-07
264635_at	19735	AT1G65500	similar to unknown protein [Arabidopsis thaliana] (TAIR:AT1G65490.1)	1.90727	3.75099	5.96927	62.6512	14.9109	1.60479e-07	2.63348e-05
256497_at	11597	AT1G31580	ECS1	1.89305	3.71418	7.88192	235.882	12.7054	6.15458e-07	6.38118e-05
253061_at	8161	AT4G37610	BT5 (BTB and TAZ domain protein 5); protein binding / transcription regulator	1.8873	3.69941	10.005	1027.53	31.1326	2.87849e-10	7.29536e-07
265817_at	20917	AT2G18050	HIS1-3 (HISTONE H1-3); DNA binding	1.86075	3.63197	7.27916	155.326	21.0669	8.41475e-09	4.45356e-06
264514_at	19614	AT1G09500	cinnamyl-alcohol dehydrogenase family / CAD family	1.8339	3.56499	5.78228	55.0349	12.8033	5.77276e-07	6.15311e-05
260116_at	15216	AT1G33960	AIG1 (AVRRPT2-INDUCED GENE 1); GTP binding	1.80824	3.50216	5.38375	41.7513	11.2545	1.6818e-06	0.000123771
255895_at	10995	AT1G18020;AT1G17990	[AT1G18020, 12-oxophytodienoate reductase, putative];[AT1G17990, 12-oxophytodienoate reductase, putative]	1.79505	3.47027	8.40053	337.918	20.0607	1.28113e-08	5.12677e-06
260567_at	15667	AT2G43820	GT/UGT74F2 (UDP-GLUCOSYLTRANSFERASE 74F2); UDP-glucosyltransferase/ UDP-glycosyltransferase/ transferase, transferring glycosyl groups / transferase, transferring hexosyl groups	1.79341	3.46633	7.66979	203.628	20.6454	1.00108e-08	4.56692e-06
247925_at	3025	AT5G57560	TCH4 (TOUCH 4); hydrolase, acting on glycosyl bonds	1.7696	3.4096	9.30856	634.096	16.0739	8.49504e-08	1.67291e-05
265837_at	20937	AT2G14560	similar to unknown protein [Arabidopsis thaliana] (TAIR:AT1G33840.1); similar to Protein of unknown function DUF567 [Medicago truncatula] (GB:ABE88873.1); contains InterPro domain Protein of unknown function DUF567; (InterPro:IPR007612)	1.76552	3.39996	8.25284	305.037	9.60124	6.14177e-06	0.000288853
249377_at	4477	AT5G40690	similar to unknown protein [Arabidopsis thaliana] (TAIR:AT2G41730.1)	1.76519	3.39919	6.81926	112.928	20.362	1.12722e-08	4.76146e-06
250287_at	5387	AT5G13330	RAP2.6L (related to AP2 6L); DNA binding / transcription factor	1.71806	3.28993	7.85482	231.492	24.1294	2.61357e-09	2.59198e-06
247718_at	2818	AT5G59310	LTP4 (LIPID TRANSFER PROTEIN 4); lipid binding	1.71654	3.28647	7.2875	156.227	17.3389	4.45936e-08	1.17394e-05
252415_at	7515	AT3G47340	ASN1 (DARK INDUCIBLE 6)	1.7093	3.27002	11.3174	2551.97	15.7138	1.02955e-07	1.89388e-05
256766_at	11866	AT3G22231	PCC1 (PATHOGEN AND CIRCADIAN CONTROLLED 1)	1.70834	3.26784	6.87328	117.236	14.1162	2.54681e-07	3.47595e-05
260101_at	15201	AT1G73260	trypsin and protease inhibitor family protein / Kunitz family protein	1.7063	3.26323	6.25128	76.1766	12.4282	7.39645e-07	7.20996e-05
262229_at	17329	AT1G68620	similar to unknown protein [Arabidopsis thaliana] (TAIR:AT5G16080.1); similar to CXE carboxylesterase [Actinidia deliciosa] (GB:ABB89015.1); contains InterPro domain Esterase/lipase/thioesterase; (InterPro:IPR000379); contains InterPro domain Alpha/beta hydrolase fold-3; (InterPro:IPR013094)	1.69226	3.23163	7.10141	137.321	14.4511	2.09034e-07	3.08194e-05
250182_at	5282	AT5G14470	GHMP kinase-related	1.67758	3.19891	6.05081	66.294	13.8025	3.0765e-07	3.98793e-05
249346_at	4446	AT5G40780	LHT1 (LYSINE HISTIDINE TRANSPORTER 1); amino acid permease/ amino acid transporter	1.67203	3.18663	8.41399	341.086	17.0876	5.05e-08	1.26687e-05
264524_at	19624	AT1G10070	ATBCAT-2; branched-chain-amino-acid transaminase/ catalytic	1.66811	3.17799	7.25739	153	20.276	1.16897e-08	4.84803e-06
260287_at	15387	AT1G80440	kelch repeat-containing F-box family protein	1.65285	3.14455	10.2136	1187.39	23.5629	3.20834e-09	2.8147e-06
256252_at	11352	AT3G11340	UDP-glucoronosyl/UDP-glucosyl transferase family protein	1.64265	3.1224	6.33046	80.4747	11.7641	1.16679e-06	9.96798e-05
267357_at	22457	AT2G40000	similar to unknown protein [Arabidopsis thaliana] (TAIR:AT3G55840.1); similar to putative Hs1pro-1-like receptor [Glycine max] (GB:AAG44839.1); contains InterPro domain Hs1pro-1, C-terminal; (InterPro:IPR009743); contains InterPro domain Hs1pro-1, N-terminal; (InterPro:IPR009869)	1.6279	3.09063	9.0232	520.299	20.3857	1.11603e-08	4.76146e-06
261339_at	16439	AT1G35710	leucine-rich repeat transmembrane protein kinase, putative	1.62545	3.08539	5.35294	40.8691	8.19327	2.16728e-05	0.000660904
245136_at	236	AT2G45210	auxin-responsive protein-related	1.5789	2.98742	6.27938	77.6749	23.0081	3.94011e-09	3.12455e-06
257823_at	12923	AT3G25190	nodulin, putative	1.56904	2.96706	6.97283	125.612	11.8101	1.12971e-06	9.68746e-05
251293_at	6393	AT3G61930	unknown protein	1.56755	2.964	7.04608	132.154	14.3628	2.20118e-07	3.17778e-05
256818_at	11918	AT3G21420	oxidoreductase, 2OG-Fe(II) oxygenase family protein	1.56458	2.95791	8.00792	257.41	19.9965	1.31681e-08	5.17871e-06
266693_at	21793	AT2G19800	MIOX2 (MYO-INOSITOL OXYGENASE 2)	1.56272	2.9541	8.24122	302.59	19.6165	1.55234e-08	5.89747e-06
267300_at	22400	AT2G30140	UDP-glucoronosyl/UDP-glucosyl transferase family protein	1.54416	2.91634	6.87662	117.509	17.061	5.11743e-08	1.26879e-05
254197_at	9297	AT4G24040	ATTRE1 (TREHALASE 1); trehalase	1.54313	2.91425	10.1261	1117.52	25.0875	1.86718e-09	2.36613e-06
259841_at	14941	AT1G52200	similar to unknown protein [Arabidopsis thaliana] (TAIR:AT3G18470.1); similar to Uncharacterized Cys-rich domain [Medicago truncatula] (GB:ABD32291.1); contains InterPro domain Protein of unknown function Cys-rich; (InterPro:IPR006461)	1.53713	2.90216	5.71657	52.5845	7.16416	6.10509e-05	0.00129421
254832_at	9932	AT4G12490	protease inhibitor/seed storage/lipid transfer protein (LTP) family protein	1.53584	2.89957	5.68986	51.6201	8.32787	1.90719e-05	0.000603369
262047_at	17147	AT1G80160	lactoylglutathione lyase family protein / glyoxalase I family protein	1.52785	2.88355	9.05951	533.561	16.6951	6.15465e-08	1.41806e-05
253666_at	8766	AT4G30270	MERI5B (MERISTEM-5); hydrolase, acting on glycosyl bonds	1.52074	2.86939	11.2798	2486.39	21.5199	7.00787e-09	4.44026e-06
262603_at	17703	AT1G15380	lactoylglutathione lyase family protein / glyoxalase I family protein	1.51437	2.85674	8.80428	447.046	13.2223	4.41031e-07	5.10656e-05
248551_at	3651	AT5G50200	WR3 (WOUND-RESPONSIVE 3); nitrate transporter	1.50462	2.8375	7.22676	149.786	13.0585	4.89504e-07	5.43629e-05
265993_at	21093	AT2G24160	0	1.4969	2.82235	5.26092	38.3437	13.333	4.11285e-07	4.91174e-05
245528_at	628	AT4G15530	PPDK (PYRUVATE ORTHOPHOSPHATE DIKINASE); kinase/ pyruvate, phosphate dikinase	1.49222	2.81322	8.42293	343.206	20.9516	8.82125e-09	4.45356e-06
259629_at	14729	AT1G56510	disease resistance protein (TIR-NBS-LRR class), putative	1.48856	2.80609	5.99913	63.9613	13.0539	4.90959e-07	5.43629e-05
258923_at	14023	AT3G10450	SCPL7; serine carboxypeptidase	1.4758	2.78138	7.1927	146.292	12.1231	9.09432e-07	8.33099e-05
253332_at	8432	AT4G33420	peroxidase, putative	1.46178	2.75448	5.67571	51.1162	8.08755	2.39901e-05	0.000706995
259561_at	14661	AT1G21250	WAK1 (CELL WALL-ASSOCIATED KINASE); kinase	1.46115	2.75328	8.52386	368.075	8.68935	1.36384e-05	0.00048429
263539_at	18639	AT2G24850	TAT3 (TYROSINE AMINOTRANSFERASE 3); transaminase	1.45969	2.75049	5.52603	46.0787	4.89448	0.000927234	0.00897316
248622_at	3722	AT5G49360	BXL1 (BETA-XYLOSIDASE 1); hydrolase, hydrolyzing O-glycosyl compounds	1.45896	2.74909	11.157	2283.42	25.1475	1.82907e-09	2.36613e-06
257623_at	12723	AT3G26210	CYP71B23 (cytochrome P450, family 71, subfamily B, polypeptide 23); oxygen binding	1.44292	2.7187	5.45935	43.9975	7.7076	3.48676e-05	0.000903783
253152_at	8252	AT4G35690	similar to unknown protein [Arabidopsis thaliana] (TAIR:AT4G35710.1); similar to hypothetical protein [Glycine max] (GB:AAK01735.1); contains InterPro domain Protein of unknown function DUF241, plant; (InterPro:IPR004320)	1.43511	2.70404	5.42156	42.86	20.2067	1.20379e-08	4.90331e-06
248606_at	3706	AT5G49450	bZIP family transcription factor	1.432	2.6982	8.96744	500.575	22.896	4.10945e-09	3.12455e-06
264636_at	19736	AT1G65490	similar to unknown protein [Arabidopsis thaliana] (TAIR:AT1G65500.1)	1.41753	2.67128	9.30943	634.48	18.3731	2.71941e-08	8.86138e-06
264960_at	20060	AT1G76930	ATEXT4 (EXTENSIN 4)	1.40767	2.65308	4.74538	26.8227	12.2814	8.16465e-07	7.75982e-05
253829_at	8929	AT4G28040	nodulin MtN21 family protein	1.40658	2.65107	7.05642	133.105	14.2305	2.37967e-07	3.41218e-05
258983_at	14083	AT3G08860	alanine--glyoxylate aminotransferase, putative / beta-alanine-pyruvate aminotransferase, putative / AGT, putative	1.39928	2.6377	5.78207	55.0269	8.25117	2.05089e-05	0.00063303
259502_at	14602	AT1G15670	kelch repeat-containing F-box family protein	1.38939	2.61968	10.1452	1132.4	22.6884	4.44506e-09	3.2707e-06
246302_at	1402	AT3G51860	CAX3 (cation exchanger 3); cation:cation antiporter	1.38062	2.60381	10.361	1315.18	24.6257	2.19224e-09	2.39373e-06
256337_at	11437	AT1G72070;AT1G72060	[AT1G72070, DNAJ heat shock N-terminal domain-containing protein];[AT1G72060, serine-type endopeptidase inhibitor]	1.36692	2.57918	5.64444	50.0204	8.40202	1.77874e-05	0.000575503
255381_at	10481	AT4G03510	RMA1 (Ring finger protein with Membrane Anchor 1); protein binding / ubiquitin-protein ligase/ zinc ion binding	1.34464	2.53967	8.94955	494.406	25.1068	1.85483e-09	2.36613e-06
262128_at	17228	AT1G52690	late embryogenesis abundant protein, putative / LEA protein, putative	1.33704	2.52632	8.38329	333.905	7.5899	3.92628e-05	0.000967154
264467_at	19567	AT1G10140	similar to unknown protein [Arabidopsis thaliana] (TAIR:AT1G58420.1); similar to Os07g0123800 [Oryza sativa (japonica cultivar-group)] (GB:NP_001058800.1); similar to Os03g0769700 [Oryza sativa (japonica cultivar-group)] (GB:NP_001051398.1); similar to hypothetical protein MtrDRAFT_AC140720g19v1 [Medicago truncatula] (GB:ABE79597.1)	1.31869	2.4944	6.61569	98.0664	10.0995	4.07848e-06	0.00022363
260772_at	15872	AT1G49050	aspartyl protease family protein	1.31276	2.48416	8.22029	298.232	17.3912	4.34621e-08	1.17394e-05
265387_at	20487	AT2G20670	similar to unknown protein [Arabidopsis thaliana] (TAIR:AT4G32480.1); similar to Protein of unknown function DUF506, plant [Medicago truncatula] (GB:ABD32359.1); contains InterPro domain Protein of unknown function DUF506, plant; (InterPro:IPR006502)	1.31148	2.48196	11.1909	2337.72	24.3329	2.43085e-09	2.52035e-06
264299_s_at	19399	AT1G78850;AT1G78860	[AT1G78850, curculin-like (mannose-binding) lectin family protein];[AT1G78860, curculin-like (mannose-binding) lectin family protein]	1.30145	2.46477	7.4333	172.841	10.583	2.78632e-06	0.000168167
251272_at	6372	AT3G61890	ATHB-12 (ARABIDOPSIS THALIANA HOMEOBOX PROTEIN 1); transcription factor	1.29159	2.44798	7.35789	164.038	14.4691	2.06859e-07	3.08194e-05
264238_at	19338	AT1G54740	similar to unknown protein [Arabidopsis thaliana] (TAIR:AT1G22110.1); similar to hypothetical protein [Oryza sativa (japonica cultivar-group)] (GB:BAD28434.1)	1.28225	2.43218	6.56455	94.6515	18.7975	2.23683e-08	7.73061e-06
246145_at	1245	AT5G19880	peroxidase, putative	1.26441	2.40228	6.54403	93.3143	14.1597	2.48178e-07	3.43088e-05
259596_at	14696	AT1G28130	GH3.17; indole-3-acetic acid amido synthetase	1.26133	2.39716	7.1185	138.957	17.546	4.02984e-08	1.14901e-05
262080_at	17180	AT1G59650	CW14	1.25176	2.38131	7.73681	213.31	18.0507	3.16345e-08	9.75851e-06
249467_at	4567	AT5G39610	ANAC092/ATNAC2/ATNAC6 (Arabidopsis NAC domain containing protein 92); protein heterodimerization/ protein homodimerization/ transcription factor	1.24568	2.3713	6.96935	125.31	7.32568	5.15201e-05	0.00115781
246099_at	1199	AT5G20230	ATBCB (ARABIDOPSIS BLUE-COPPER-BINDING PROTEIN); copper ion binding	1.2426	2.36624	9.98596	1014.09	21.2705	7.74712e-09	4.45356e-06
258395_at	13495	AT3G15500	ATNAC3 (ARABIDOPSIS NAC DOMAIN CONTAINING PROTEIN 55); transcription factor	1.23888	2.36015	8.14282	282.641	12.6556	6.35935e-07	6.48137e-05
261177_at	16277	AT1G04770	male sterility MS5 family protein	1.23632	2.35597	8.19265	292.573	14.88	1.63319e-07	2.66093e-05
260551_at	15651	AT2G43510	ATTI1 (ARABIDOPSIS THALIANA TRYPSIN INHIBITOR PROTEIN 1)	1.23605	2.35553	8.3555	327.533	16.708	6.11436e-08	1.41806e-05
259546_at	14646	AT1G35350	similar to SHB1 (SHORT HYPOCOTYL UNDER BLUE1) [Arabidopsis thaliana] (TAIR:AT4G25350.1); similar to EXS family protein / ERD1/XPR1/SYG1 family protein [Arabidopsis thaliana] (TAIR:AT1G26730.1); similar to unknown protein [Arabidopsis thaliana] (TAIR:AT1G14040.1); similar to SPX, N-terminal; EXS, C-terminal [Medicago truncatula] (GB:ABD32751.1); contains InterPro domain SPX, N-terminal; (InterPro:…	1.23165	2.34835	6.04605	66.0758	14.4371	2.10753e-07	3.08194e-05
248322_at	3422	AT5G52760	heavy-metal-associated domain-containing protein	1.22487	2.33735	4.99849	31.9665	12.1058	9.20232e-07	8.39619e-05
263584_at	18684	AT2G17040	ANAC036 (Arabidopsis NAC domain containing protein 36); transcription factor	1.22372	2.33548	5.03386	32.7598	7.89159	2.9042e-05	0.000804012
256647_at	11747	AT3G13610	oxidoreductase, 2OG-Fe(II) oxygenase family protein	1.21683	2.32436	7.04008	131.606	20.4177	1.10113e-08	4.76146e-06
247327_at	2427	AT5G64120	peroxidase, putative	1.21606	2.32311	6.23412	75.2763	13.4685	3.7788e-07	4.65916e-05
264777_at	19877	AT1G08630	THA1 (THREONINE ALDOLASE 1); aldehyde-lyase/ threonine aldolase	1.21227	2.31703	9.02969	522.644	18.6465	2.39671e-08	8.15954e-06
252604_at	7704	AT3G45060	ATNRT2.6 (Arabidopsis thaliana high affinity nitrate transporter 2.6); nitrate transporter	1.20897	2.31172	7.43671	173.25	11.1129	1.86657e-06	0.00013139
249112_at	4212	AT5G43780	APS4	1.20626	2.30739	7.94113	245.765	16.5908	6.49187e-08	1.45176e-05
253046_at	8146	AT4G37370	CYP81D8 (cytochrome P450, family 81, subfamily D, polypeptide 8); oxygen binding	1.20397	2.30373	6.12264	69.6786	10.0202	4.34814e-06	0.000234351
266292_at	21392	AT2G29350	SAG13 (Senescence-associated gene 13); oxidoreductase	1.18387	2.27185	6.78992	110.654	7.86645	2.97708e-05	0.000817119
252993_at	8093	AT4G38540	monooxygenase, putative (MO2)	1.17884	2.26395	6.84667	115.094	17.5872	3.95015e-08	1.14054e-05
253414_at	8514	AT4G33050	EDA39 (embryo sac development arrest 39); calmodulin binding	1.17743	2.26174	7.50808	182.036	9.05265	9.84642e-06	0.000387905
256933_at	12033	AT3G22600	protease inhibitor/seed storage/lipid transfer protein (LTP) family protein	1.17498	2.2579	6.94751	123.427	9.40733	7.23772e-06	0.000321191
251196_at	6296	AT3G62950	glutaredoxin family protein	1.17304	2.25487	7.25689	152.947	14.8467	1.66439e-07	2.67357e-05
259550_at	14650	AT1G35230	AGP5 (ARABINOGALACTAN-PROTEIN 5)	1.1716	2.25261	5.96805	62.598	9.18974	8.73174e-06	0.000356937
245325_at	425	AT4G14130	XTR7 (XYLOGLUCAN ENDOTRANSGLYCOSYLASE 7); hydrolase, acting on glycosyl bonds	1.16551	2.24313	9.39671	674.05	17.4724	4.17692e-08	1.17394e-05
264434_at	19534	AT1G10340	ankyrin repeat family protein	1.16404	2.24083	5.97412	62.862	10.723	2.50215e-06	0.000159871
247819_at	2919	AT5G58350	WNK4 (Arabidopsis WNK kinase 4); kinase	1.16137	2.2367	7.62491	197.39	17.7147	3.71391e-08	1.10019e-05
250099_at	5199	AT5G17300	myb family transcription factor	1.16128	2.23656	9.17248	577.02	15.8675	9.47982e-08	1.78706e-05
258362_at	13462	AT3G14280	similar to hypothetical protein MtrDRAFT_AC157534g12v1 [Medicago truncatula] (GB:ABE86457.1)	1.15632	2.22889	5.71902	52.6741	9.88569	4.85128e-06	0.000251563
254001_at	9101	AT4G26260	MIOX4 (MYO-INOSITOL OXYGENASE 4)	1.1558	2.22808	9.0134	516.778	11.4934	1.4144e-06	0.000110443
247954_at	3054	AT5G56870	beta-galactosidase, putative / lactase, putative	1.15504	2.22691	10.7426	1713.39	14.0562	2.63969e-07	3.54146e-05
265680_at	20780	AT2G32150	haloacid dehalogenase-like hydrolase family protein	1.14973	2.21872	11.2202	2385.66	13.2618	4.30161e-07	5.02007e-05
248050_at	3150	AT5G56100	glycine-rich protein / oleosin	1.1456	2.21238	8.40574	339.142	17.3306	4.47753e-08	1.17394e-05
254573_at	9673	AT4G19420	pectinacetylesterase family protein	1.14511	2.21163	8.92012	484.423	15.256	1.32252e-07	2.25124e-05
266327_at	21427	AT2G46680	ATHB-7 (ARABIDOPSIS THALIANA HOMEOBOX 7); transcription factor	1.14361	2.20933	7.70463	208.606	14.4369	2.10777e-07	3.08194e-05
251705_at	6805	AT3G56400	WRKY70 (WRKY DNA-binding protein 70); transcription factor	1.14043	2.20446	9.0095	515.384	7.87613	2.94877e-05	0.000812337
249983_at	5083	AT5G18470	curculin-like (mannose-binding) lectin family protein	1.13529	2.19662	5.35967	41.0603	7.18822	5.95159e-05	0.00127665
245264_at	364	AT4G17245	zinc finger (C3HC4-type RING finger) family protein	1.13386	2.19446	8.56214	377.974	14.1292	2.5271e-07	3.47248e-05
263478_at	18578	AT2G31880	leucine-rich repeat transmembrane protein kinase, putative	1.12393	2.1794	9.22246	597.363	11.9278	1.04054e-06	9.13793e-05
253874_at	8974	AT4G27450	similar to unknown protein [Arabidopsis thaliana] (TAIR:AT3G15450.1); similar to unknown [Glycine max] (GB:AAG00940.1); contains domain no description (G3D.3.60.20.10); contains domain N-terminal nucleophile aminohydrolases (Ntn hydrolases) (SSF56235)	1.1239	2.17935	10.8645	1864.38	20.5573	1.03851e-08	4.6448e-06
258791_at	13891	AT3G04720	PR4 (PATHOGENESIS-RELATED 4)	1.11958	2.17283	7.05621	133.085	8.77574	1.26091e-05	0.000452934
264280_at	19380	AT1G61820	BGLU46; hydrolase, hydrolyzing O-glycosyl compounds	1.11879	2.17164	7.10775	137.926	10.0796	4.1445e-06	0.000225623
245859_at	959	AT5G28290	protein kinase, putative	1.1124	2.16204	7.662	202.531	14.8663	1.64596e-07	2.66272e-05
259015_at	14115	AT3G07350	similar to unknown protein [Arabidopsis thaliana] (TAIR:AT3G25240.1); similar to Os01g0915000 [Oryza sativa (japonica cultivar-group)] (GB:NP_001045184.1); similar to uncharacterized plant-specific domain TIGR01615 family protein, expressed [Oryza sativa (japonica cultivar-group)] (GB:ABA93251.2); contains InterPro domain Protein of unknown function DUF506, plant; (InterPro:IPR006502)	1.11207	2.16156	8.5852	384.062	14.1075	2.5601e-07	3.47595e-05
253806_at	8906	AT4G28270	zinc finger (C3HC4-type RING finger) family protein	1.09936	2.14259	8.33108	322.037	15.4722	1.17403e-07	2.09216e-05
263680_at	18780	AT1G26930	kelch repeat-containing F-box family protein	1.09798	2.14054	7.22038	149.126	11.424	1.48682e-06	0.000114576
267477_at	22577	AT2G02710	PAC motif-containing protein	1.09505	2.13621	10.3754	1328.37	16.4712	6.90375e-08	1.49901e-05
247866_at	2966	AT5G57550	XTR3 (XYLOGLUCAN ENDOTRANSGLYCOSYLASE 3); hydrolase, acting on glycosyl bonds	1.09205	2.13176	5.85621	57.9287	12.7653	5.91762e-07	6.22031e-05
267262_at	22362	AT2G22990	SNG1 (SINAPOYLGLUCOSE 1); serine carboxypeptidase	1.09163	2.13114	10.3596	1313.87	17.332	4.47456e-08	1.17394e-05
247717_at	2817	AT5G59320	LTP3 (LIPID TRANSFER PROTEIN 3); lipid binding	1.09086	2.13001	8.27166	309.042	14.0265	2.68717e-07	3.56362e-05
253182_at	8282	AT4G35190	similar to unknown protein [Arabidopsis thaliana] (TAIR:AT2G37210.1); similar to Conserved hypothetical protein 730 [Medicago truncatula] (GB:ABD32794.1); contains InterPro domain Conserved hypothetical protein 730; (InterPro:IPR005269)	1.09058	2.1296	7.83033	227.596	12.4305	7.38471e-07	7.20996e-05
253099_s_at	8199	AT4G37530;AT4G37520	[AT4G37530, peroxidase, putative];[AT4G37520, peroxidase 50 (PER50) (P50) (PRXR2)]	1.08649	2.12357	7.84691	230.226	11.5466	1.36143e-06	0.000107832
249337_at	4437	AT5G41080	glycerophosphoryl diester phosphodiesterase family protein	1.08644	2.1235	8.54646	373.887	10.6433	2.65972e-06	0.000164412
263118_at	18218	AT1G03090	MCCA (3-methylcrotonyl-CoA carboxylase 1)	1.08326	2.11882	9.97542	1006.7	19.5803	1.57714e-08	5.89747e-06
267083_at	22183	AT2G41100	TCH3 (TOUCH 3)	1.07975	2.11367	10.1815	1161.24	8.47594	1.6601e-05	0.000552802
264729_at	19829	AT1G22990	heavy-metal-associated domain-containing protein / copper chaperone (CCH)-related	1.07526	2.10709	7.15188	142.21	8.49182	1.63576e-05	0.000547094
265674_at	20774	no_match	no_match	1.0742	2.10555	6.39554	84.1876	7.01363	7.16971e-05	0.00144334
250028_at	5128	AT5G18130	similar to unknown protein [Arabidopsis thaliana] (TAIR:AT3G03870.2); similar to hypothetical protein MtrDRAFT_AC156827g15v1 [Medicago truncatula] (GB:ABE86405.1)	1.07056	2.10025	8.31533	318.541	18.46	2.6118e-08	8.63407e-06
252367_at	7467	AT3G48360	BT2 (BTB and TAZ domain protein 2); protein binding / transcription regulator	1.06468	2.0917	9.43456	691.965	11.6403	1.27344e-06	0.00010374
249101_at	4201	AT5G43580	serine-type endopeptidase inhibitor	1.05886	2.08328	4.4826	22.3561	9.97677	4.50387e-06	0.000238915
261567_at	16667	AT1G33055	unknown protein	1.05839	2.08261	6.6887	103.157	15.3819	1.23368e-07	2.1457e-05
259977_at	15077	AT1G76590	zinc-binding family protein	1.05542	2.07833	6.65353	100.673	10.9298	2.1395e-06	0.00014228
257382_at	12482	AT2G40750	WRKY54 (WRKY DNA-binding protein 54); transcription factor	1.04675	2.06588	7.19508	146.533	11.0975	1.88792e-06	0.00013139
245262_at	362	AT4G16563	aspartyl protease family protein	1.04217	2.05933	5.86207	58.1645	7.94154	2.76515e-05	0.000778681
253908_at	9008	AT4G27260	GH3.5/WES1; indole-3-acetic acid amido synthetase	1.03833	2.05385	10.4063	1357.09	16.3987	7.16767e-08	1.52799e-05
262635_at	17735	AT1G06570	PDS1 (PHYTOENE DESATURATION 1)	1.03338	2.04682	9.27087	617.747	16.6459	6.31134e-08	1.43962e-05
254343_at	9443	AT4G21990	APR3 (APS REDUCTASE 3)	1.03269	2.04583	9.58416	767.574	12.2171	8.52884e-07	7.97307e-05
250286_at	5386	AT5G13320	PBS3 (AVRPPHB SUSCEPTIBLE 3)	1.03058	2.04285	7.13303	140.364	12.5034	7.03409e-07	7.03717e-05
251400_at	6500	AT3G60420	similar to unknown protein [Arabidopsis thaliana] (TAIR:AT3G60450.1); similar to pRIB5 protein [Ribes nigrum] (GB:CAA07566.1); contains InterPro domain Phosphoglycerate mutase; (InterPro:IPR013078); contains InterPro domain PRIB5; (InterPro:IPR012398)	1.02981	2.04175	7.19322	146.344	5.25409	0.000575592	0.00631214
264774_at	19874	AT1G22890	similar to unknown protein [Arabidopsis thaliana] (TAIR:AT5G44568.1); contains domain FAMILY NOT NAMED (PTHR12953); contains domain SUBFAMILY NOT NAMED (PTHR12953:SF10)	1.02321	2.03244	9.7526	862.633	11.5647	1.34393e-06	0.000107832
249125_at	4225	AT5G43450	2-oxoglutarate-dependent dioxygenase, putative	1.02133	2.02979	7.4802	178.552	7.90435	2.86797e-05	0.000798558
265111_at	20211	AT1G62510	protease inhibitor/seed storage/lipid transfer protein (LTP) family protein	1.02109	2.02945	6.58121	95.7504	9.83368	5.0629e-06	0.000258355
251084_at	6184	AT5G01520	zinc finger (C3HC4-type RING finger) family protein	1.02001	2.02793	7.07521	134.85	16.602	6.4548e-08	1.45176e-05
252320_at	7420	AT3G48580	xyloglucan:xyloglucosyl transferase, putative / xyloglucan endotransglycosylase, putative / endo-xyloglucan transferase, putative	1.01821	2.02541	7.58369	191.83	6.95226	7.66087e-05	0.00150382
263482_at	18582	AT2G03980	GDSL-motif lipase/hydrolase family protein	1.0156	2.02174	8.091	272.668	13.3647	4.03188e-07	4.86047e-05
247754_at	2854	AT5G59080	similar to unknown protein [Arabidopsis thaliana] (TAIR:AT5G02020.1)	1.01535	2.0214	6.91387	120.582	15.6126	1.08753e-07	1.96246e-05
246781_at	1881	AT5G27350	SFP1; carbohydrate transporter/ sugar porter	1.01326	2.01847	8.24391	303.154	15.0151	1.51313e-07	2.53783e-05
257264_at	12364	AT3G22060	receptor protein kinase-related	1.00225	2.00312	7.30509	158.143	9.84551	5.01387e-06	0.000256427
256894_at	11994	AT3G21870	CYCP2;1 (cyclin p2;1); cyclin-dependent protein kinase	0.999087	1.99873	9.12224	557.272	14.5188	2.00967e-07	3.08194e-05
255116_at	10216	AT4G08850	leucine-rich repeat family protein / protein kinase family protein	0.998858	1.99842	7.73659	213.278	10.6918	2.56257e-06	0.000162394
246831_at	1931	AT5G26340	MSS1 (SUGAR TRANSPORT PROTEIN 13); carbohydrate transporter/ hexose:hydrogen symporter/ high-affinity hydrogen:glucose transporter/ sugar porter	0.996433	1.99506	8.41497	341.318	6.89645	8.13967e-05	0.00156153
248197_at	3297	AT5G54190	PORA (Protochlorophyllide reductase A); oxidoreductase/ protochlorophyllide reductase	0.996008	1.99447	7.97104	250.912	17.7635	3.62783e-08	1.08883e-05
263046_at	18146	AT2G05380	GRP3S (GLYCINE-RICH PROTEIN 3 SHORT ISOFORM)	0.992069	1.98904	10.785	1764.48	9.79431	5.22983e-06	0.000263921
264652_at	19752	AT1G08920	sugar transporter, putative	0.990739	1.9872	6.82146	113.101	18.0491	3.16585e-08	9.75851e-06
247869_at	2969	AT5G57520	ZFP2 (ZINC FINGER PROTEIN 2); nucleic acid binding / transcription factor/ zinc ion binding	0.989997	1.98618	5.63525	49.7026	9.9365	4.65398e-06	0.000246304
266743_at	21843	AT2G02990	RNS1 (RIBONUCLEASE 1); endoribonuclease	0.986676	1.98161	8.21464	297.065	10.5908	2.7695e-06	0.000168011
262085_at	17185	AT1G56060	similar to unknown protein [Arabidopsis thaliana] (TAIR:AT2G32190.1); similar to conserved hypothetical protein [Medicago truncatula] (GB:ABD32591.1)	0.985211	1.9796	6.34172	81.1048	8.91363	1.11393e-05	0.000412791
266993_at	22093	AT2G39210	nodulin family protein	0.984991	1.9793	6.91443	120.629	9.86567	4.93155e-06	0.000253353
260155_at	15255	AT1G52870	peroxisomal membrane protein-related	0.983265	1.97693	10.4419	1391.03	16.327	7.43935e-08	1.5646e-05
264751_at	19851	AT1G23020	ATFRO3/FRO3 (FERRIC REDUCTION OXIDASE 3); ferric-chelate reductase	0.981732	1.97484	7.24773	151.979	6.93075	7.84165e-05	0.00152488
249777_at	4877	AT5G24210	lipase class 3 family protein	0.977811	1.96947	6.74221	107.055	9.53547	6.49149e-06	0.000299409
256789_at	11889	AT3G13672	seven in absentia (SINA) family protein	0.976051	1.96707	5.18487	36.375	8.86923	1.15908e-05	0.000427118
267230_at	22330	AT2G44080	ARL (ARGOS-LIKE)	0.970593	1.95965	7.49949	180.955	9.76684	5.34993e-06	0.000267614
256425_at	11525	AT1G33560	ADR1 (ACTIVATED DISEASE RESISTANCE 1)	0.968401	1.95667	6.99016	127.13	15.7415	1.01431e-07	1.88102e-05
264505_at	19605	AT1G09380	integral membrane family protein / nodulin MtN21-related	0.963257	1.94971	6.931	122.023	5.51385	0.000412559	0.00498903
259520_at	14620	AT1G12320	similar to unknown protein [Arabidopsis thaliana] (TAIR:AT1G62840.1); similar to Os02g0455400 [Oryza sativa (japonica cultivar-group)] (GB:NP_001046773.1); similar to unknown protein [Oryza sativa (japonica cultivar-group)] (GB:BAD19988.1); contains InterPro domain Protein of unknown function DUF1442; (InterPro:IPR009902)	0.962887	1.94921	8.49224	360.097	16.3174	7.47659e-08	1.5646e-05
254057_at	9157	AT4G25170	similar to unknown protein [Arabidopsis thaliana] (TAIR:AT5G61490.1); similar to putative protein [Oryza sativa] (GB:CAC39077.1); similar to Os02g0657700 [Oryza sativa (japonica cultivar-group)] (GB:NP_001047631.1)	0.960154	1.94552	9.39557	673.518	14.9622	1.55893e-07	2.57675e-05
259856_at	14956	AT1G68440	similar to unknown protein [Arabidopsis thaliana] (TAIR:AT1G25400.1); similar to IMP dehydrogenase/GMP reductase [Medicago truncatula] (GB:ABE93249.1)	0.955324	1.93902	10.1332	1123.06	14.9954	1.52995e-07	2.54731e-05
267168_at	22268	AT2G37770	aldo/keto reductase family protein	0.955147	1.93878	7.74119	213.959	14.4972	2.03502e-07	3.08194e-05
263866_at	18966	AT2G36950	heavy-metal-associated domain-containing protein	0.95501	1.93859	8.99967	511.882	15.3701	1.2417e-07	2.1457e-05
246523_at	1623	AT5G15850	COL1 (CONSTANS-LIKE 1); transcription factor/ zinc ion binding	0.954213	1.93752	9.61019	781.548	10.7342	2.481e-06	0.000159499
261265_at	16365	AT1G26800	zinc finger (C3HC4-type RING finger) family protein	0.953998	1.93723	7.93692	245.049	13.669	3.33816e-07	4.23019e-05
262412_at	17512	AT1G34760	GRF11 (General regulatory factor 11); amino acid binding / protein phosphorylated amino acid binding	0.948692	1.93012	6.22242	74.668	12.2185	8.52073e-07	7.97307e-05
264499_at	19599	AT1G30795	hydroxyproline-rich glycoprotein family protein	0.947707	1.92881	8.38916	335.265	7.5937	3.91116e-05	0.000966265
252250_at	7350	AT3G49790	similar to ATPP2-A10 (Phloem protein 2-A10) [Arabidopsis thaliana] (TAIR:AT1G10150.1); similar to hypothetical protein [Oryza sativa (japonica cultivar-group)] (GB:AAT85053.1); similar to Os03g0769900 [Oryza sativa (japonica cultivar-group)] (GB:NP_001051400.1); similar to expressed protein [Oryza sativa (japonica cultivar-group)] (GB:AAR87321.1); contains domain FAMILY NOT NAMED (PTHR21477); con…	0.946297	1.92692	7.74488	214.506	9.19201	8.71455e-06	0.000356874
262456_at	17556	AT1G11260	STP1 (SUGAR TRANSPORTER 1); carbohydrate transporter/ sugar porter	0.94469	1.92477	12.3251	5131.28	12.3467	7.81266e-07	7.51928e-05
248169_at	3269	AT5G54610	ANK (ANKYRIN); protein binding	0.944064	1.92394	4.61211	24.4559	9.22031	8.50265e-06	0.000352628
253814_at	8914	AT4G28290	unknown protein	0.943203	1.92279	7.7362	213.22	13.7212	3.23299e-07	4.14295e-05
245392_at	492	AT4G15680	glutaredoxin family protein	0.941255	1.9202	8.88675	473.344	10.892	2.20116e-06	0.000145955
265547_at	20647	AT2G28305	similar to unknown protein [Arabidopsis thaliana] (TAIR:AT2G37210.1); similar to Conserved hypothetical protein 730 [Medicago truncatula] (GB:ABE89044.1); contains InterPro domain Conserved hypothetical protein 730; (InterPro:IPR005269)	0.939299	1.9176	8.2916	313.343	16.9867	5.3114e-08	1.30272e-05
256603_at	11703	AT3G28270	similar to AT14A [Arabidopsis thaliana] (TAIR:AT3G28290.1); similar to AT14A [Arabidopsis thaliana] (TAIR:AT3G28300.1); similar to Protein of unknown function DUF677 [Medicago truncatula] (GB:ABE78510.1); contains InterPro domain Protein of unknown function DUF677; (InterPro:IPR007749)	0.936174	1.91345	9.02389	520.549	9.8845	4.85603e-06	0.000251563
260637_at	15737	AT1G62380	ACO2 (ACC OXIDASE 2)	0.935257	1.91223	11.1684	2301.51	15.9356	9.14135e-08	1.75222e-05
251356_at	6456	AT3G61060	ATPP2-A13	0.933864	1.91039	8.86986	467.835	14.0466	2.65493e-07	3.54146e-05
253864_at	8964	AT4G27460	CBS domain-containing protein	0.933078	1.90935	6.09104	68.169	12.7701	5.89892e-07	6.22031e-05
246943_at	2043	AT5G25440	protein kinase family protein	0.924201	1.89763	6.00734	64.3266	7.97598	2.67357e-05	0.000763255
256569_at	11669	AT3G19550	similar to expressed protein [Oryza sativa (japonica cultivar-group)] (GB:ABA98694.1); similar to Os12g0507700 [Oryza sativa (japonica cultivar-group)] (GB:NP_001066848.1)	0.922071	1.89483	8.05041	265.102	7.80205	3.1731e-05	0.00085151
246114_at	1214	AT5G20250	DIN10 (DARK INDUCIBLE 10); hydrolase, hydrolyzing O-glycosyl compounds	0.919854	1.89192	12.6779	6552.98	15.6039	1.09265e-07	1.96246e-05
247780_at	2880	AT5G58770	dehydrodolichyl diphosphate synthase, putative / DEDOL-PP synthase, putative	0.919056	1.89088	6.83756	114.37	8.27095	2.01273e-05	0.000624631
248713_at	3813	AT5G48180	AtNSP5; kelch repeat-containing protein	0.918265	1.88984	10.4379	1387.18	16.8983	5.55271e-08	1.34742e-05
245277_at	377	AT4G15550	IAGLU (INDOLE-3-ACETATE BETA-D-GLUCOSYLTRANSFERASE); UDP-glycosyltransferase/ transferase, transferring glycosyl groups	0.918127	1.88966	7.26379	153.68	9.68547	5.72394e-06	0.000277794
246396_at	1496	AT1G58180	carbonic anhydrase family protein / carbonate dehydratase family protein	0.909765	1.87874	9.57399	762.181	16.033	8.68107e-08	1.67809e-05
248759_at	3859	AT5G47610	zinc finger (C3HC4-type RING finger) family protein	0.9095	1.87839	7.38592	167.257	8.54434	1.55806e-05	0.000529649
266265_at	21365	AT2G29340	short-chain dehydrogenase/reductase (SDR) family protein	0.90816	1.87665	8.77379	437.699	15.4294	1.2019e-07	2.12521e-05
260693_at	15793	AT1G32450	proton-dependent oligopeptide transport (POT) family protein	0.900537	1.86676	8.24782	303.978	6.03227	0.000218171	0.00314768
249495_at	4595	AT5G39100	GLP6 (GERMIN-LIKE PROTEIN 6); manganese ion binding / metal ion binding / nutrient reservoir	0.899225	1.86506	6.83166	113.903	7.74593	3.35553e-05	0.000882809
264624_at	19724	AT1G08930	ERD6 (EARLY RESPONSE TO DEHYDRATION 6); carbohydrate transporter/ sugar porter	0.897469	1.8628	8.3912	335.74	8.82965	1.20105e-05	0.000439036
252483_at	7583	AT3G46600	scarecrow transcription factor family protein	0.895248	1.85993	8.85796	463.994	11.4771	1.43103e-06	0.000111027
259385_at	14485	AT1G13470	similar to unknown protein [Arabidopsis thaliana] (TAIR:AT1G13520.1); similar to hypothetical protein [Oryza sativa (japonica cultivar-group)] (GB:BAC99699.1); contains InterPro domain Protein of unknown function DUF1262; (InterPro:IPR010683)	0.893787	1.85805	4.68721	25.7626	6.12354	0.00019574	0.00291985
256244_at	11344	AT3G12520	SULTR4;2 (sulfate transporter 4;2); sulfate transporter	0.893779	1.85804	7.65058	200.934	8.98945	1.04124e-05	0.000399968
260527_at	15627	AT2G47270	transcription factor/ transcription regulator	0.893743	1.85799	5.65656	50.4422	6.22521	0.000173675	0.00266589
263598_at	18698	AT2G01850	EXGT-A3 (endo-xyloglucan transferase A3); hydrolase, acting on glycosyl bonds	0.893485	1.85766	10.4018	1352.85	10.5757	2.80209e-06	0.000168362
251342_at	6442	AT3G60690	auxin-responsive family protein	0.891945	1.85568	7.72941	212.218	12.0941	9.27684e-07	8.39702e-05
262569_at	17669	AT1G15180	MATE efflux family protein	0.890894	1.85433	7.63483	198.753	10.4226	3.15632e-06	0.000185678
260774_at	15874	AT1G78290	serine/threonine protein kinase, putative	0.890352	1.85363	7.71839	210.604	13.3581	4.04861e-07	4.86047e-05
253048_at	8148	AT4G37560	formamidase, putative / formamide amidohydrolase, putative	0.889748	1.85285	7.66117	202.415	11.0582	1.94389e-06	0.000133958
263963_at	19063	AT2G36080	DNA-binding protein, putative	0.889261	1.85223	8.42851	344.537	9.91726	4.72765e-06	0.000249048
250114_s_at	5214	AT5G16370;AT5G16340	[AT5G16370, AMP-binding protein, putative];[AT5G16340, AMP-binding protein, putative]	0.882622	1.84372	9.47681	712.529	13.2888	4.22889e-07	4.97222e-05
252068_at	7168	AT3G51440	strictosidine synthase family protein	0.879741	1.84004	6.01905	64.8508	9.87839	4.88039e-06	0.000251859
262381_at	17481	AT1G72900	disease resistance protein (TIR-NBS class), putative	0.87367	1.83232	5.12137	34.8085	6.5509	0.000119428	0.00203751
247351_at	2451	AT5G63790	ANAC102 (Arabidopsis NAC domain containing protein 102); transcription factor	0.872454	1.83077	8.03869	262.958	7.18136	5.99487e-05	0.00127914
248207_at	3307	AT5G53970	aminotransferase, putative	0.869864	1.82749	8.18171	290.363	13.1815	4.52575e-07	5.18756e-05
251996_at	7096	AT3G52840	beta-galactosidase, putative / lactase, putative	0.866457	1.82318	9.14995	568.078	13.2574	4.31361e-07	5.02007e-05
249775_at	4875	AT5G24160	squalene monooxygenase 1,2 / squalene epoxidase 1,2 (SQP1,2)	0.862632	1.81835	8.78942	442.466	10.6512	2.64369e-06	0.000164312
250665_at	5765	AT5G06980	similar to unknown protein [Arabidopsis thaliana] (TAIR:AT3G12320.1)	0.859814	1.8148	8.39576	336.802	12.1618	8.85651e-07	8.22774e-05
252570_at	7670	AT3G45300	IVD (ISOVALERYL-COA-DEHYDROGENASE)	0.859468	1.81437	9.03626	525.032	11.6617	1.25427e-06	0.000102544
263231_at	18331	AT1G05680	UDP-glucoronosyl/UDP-glucosyl transferase family protein	0.858423	1.81305	8.94121	491.556	10.6687	2.60842e-06	0.000163732
257670_at	12770	AT3G20340	similar to unknown protein [Arabidopsis thaliana] (TAIR:AT4G21920.1)	0.858162	1.81273	6.50902	91.0774	8.67733	1.37887e-05	0.000486771
248327_at	3427	AT5G52750	heavy-metal-associated domain-containing protein	0.858044	1.81258	5.49172	44.996	8.03189	2.5319e-05	0.000734766
249417_at	4517	AT5G39670	calcium-binding EF hand family protein	0.854343	1.80794	5.14793	35.4553	12.7403	6.01504e-07	6.26498e-05
247488_at	2588	AT5G61820	similar to hypothetical protein [Trifolium pratense] (GB:BAE71234.1); contains InterPro domain Stress up-regulated Nod 19; (InterPro:IPR011692)	0.852304	1.80538	10.6033	1555.67	11.1569	1.80688e-06	0.000129411
265648_at	20748	AT2G27500	glycosyl hydrolase family 17 protein	0.848728	1.80091	8.13044	280.224	9.07836	9.62596e-06	0.000382238
262454_at	17554	AT1G11190	BFN1 (BIFUNCTIONAL NUCLEASE I); nucleic acid binding	0.847246	1.79906	8.87025	467.961	8.7929	1.2415e-05	0.00044808
252037_at	7137	AT3G51920	CAM9 (CALMODULIN 9); calcium ion binding	0.846906	1.79864	8.4424	347.869	9.29019	8.0035e-06	0.000339331
252136_at	7236	AT3G50770	calmodulin-related protein, putative	0.846188	1.79774	5.20105	36.7852	9.46463	6.89293e-06	0.000310727
261892_at	16992	AT1G80840	WRKY40 (WRKY DNA-binding protein 40); transcription factor	0.844952	1.7962	5.86069	58.109	14.5013	2.03014e-07	3.08194e-05
267093_at	22193	AT2G38170	CAX1 (CATION EXCHANGER 1); calcium:hydrogen antiporter	0.84415	1.79521	12.249	4867.69	14.5074	2.02295e-07	3.08194e-05
260475_at	15575	AT1G11080	SCPL31 (serine carboxypeptidase-like 31); serine carboxypeptidase	0.843946	1.79495	7.40288	169.235	9.53122	6.51479e-06	0.000299409
256245_at	11345	AT3G12580	HSP70 (heat shock protein 70); ATP binding	0.843518	1.79442	7.52492	184.173	10.955	2.09949e-06	0.000140438
251882_at	6982	AT3G54140	proton-dependent oligopeptide transport (POT) family protein	0.843135	1.79394	8.04541	264.185	10.9555	2.09862e-06	0.000140438
266072_at	21172	AT2G18700	ATTPS11 (Arabidopsis thaliana trehalose phosphatase/synthase 11); transferase, transferring glycosyl groups	0.842773	1.79349	10.6478	1604.39	11.1035	1.87967e-06	0.00013139
264788_at	19888	AT2G17880	DNAJ heat shock protein, putative	0.841242	1.79159	9.36148	657.791	12.5039	7.03176e-07	7.03717e-05
256892_at	11992	AT3G19000	oxidoreductase, 2OG-Fe(II) oxygenase family protein	0.841047	1.79135	8.49462	360.691	13.1437	4.63597e-07	5.23498e-05
248932_at	4032	AT5G46050	ATPTR3/PTR3 (PEPTIDE TRANSPORTER PROTEIN 3); transporter	0.840514	1.79069	6.98242	126.449	9.87034	4.91272e-06	0.000252955
245420_at	520	AT4G17410	similar to unknown protein [Arabidopsis thaliana] (TAIR:AT5G47430.1); similar to hypothetical protein 31.t00039 [Brassica oleracea] (GB:ABD65123.1); similar to Zinc finger, RING-type; Zinc finger, CCHC-type [Medicago truncatula] (GB:ABE84222.1); similar to hypothetical protein 24.t00020 [Brassica oleracea] (GB:ABD64942.1); contains domain RING/U-box (SSF57850); contains domain Retrovirus zinc fin…	0.840093	1.79017	6.36357	82.343	12.0601	9.49607e-07	8.56148e-05
256922_at	12022	AT3G19010	oxidoreductase, 2OG-Fe(II) oxygenase family protein	0.838779	1.78854	8.76976	436.476	10.3689	3.2922e-06	0.000191082
257315_at	12415	AT3G30775	ERD5 (EARLY RESPONSIVE TO DEHYDRATION 5, PROLINE OXIDASE); proline dehydrogenase	0.838132	1.78773	11.5831	3068.11	14.6359	1.87794e-07	2.9747e-05
259428_at	14528	AT1G01560	ATMPK11 (Arabidopsis thaliana MAP kinase 11); MAP kinase/ kinase	0.837149	1.78652	5.51618	45.7651	6.80302	9.01634e-05	0.00167478
267181_at	22281	AT2G37760	aldo/keto reductase family protein	0.836651	1.7859	9.16838	575.383	9.17363	8.85522e-06	0.000359985
259076_at	14176	AT3G02140	TMAC2 (TWO OR MORE ABRES-CONTAINING GENE 2)	0.834712	1.7835	7.21869	148.95	8.65719	1.40449e-05	0.000492867
264375_at	19475	AT2G25090	CIPK16 (CIPK16); kinase	0.833643	1.78218	5.47086	44.3498	6.2879	0.000161433	0.00251694
258275_at	13375	AT3G15760	similar to unknown protein [Arabidopsis thaliana] (TAIR:AT1G52565.1); similar to conserved hypothetical protein [Medicago truncatula] (GB:ABD28733.1)	0.833318	1.78178	7.05236	132.731	10.865	2.24657e-06	0.000147678
245228_at	328	AT3G29810	phytochelatin synthetase family protein / COBRA cell expansion protein COBL2	0.8298	1.77744	7.41	170.072	11.3785	1.53663e-06	0.000116653
251028_at	6128	AT5G02230	haloacid dehalogenase-like hydrolase family protein	0.829371	1.77691	10.5406	1489.5	12.8086	5.75286e-07	6.15311e-05
266719_at	21819	AT2G46830	CCA1 (CIRCADIAN CLOCK ASSOCIATED 1); transcription factor	0.825547	1.77221	8.63282	396.952	15.4052	1.21793e-07	2.13699e-05
256024_at	11124	AT1G58340	ZF14; transporter	0.824004	1.77031	6.23185	75.1579	11.0055	2.02171e-06	0.000138069
254453_at	9553	AT4G21120	AAT1 (CATIONIC AMINO ACID TRANSPORTER 1); cationic amino acid transporter	0.823623	1.76985	7.95764	248.592	9.93237	4.66969e-06	0.000246564
245038_at	138	AT2G26560	PLP2 (PHOSPHOLIPASE A 2A); nutrient reservoir	0.822865	1.76892	5.6385	49.8147	8.29575	1.96597e-05	0.000617684
258323_at	13423	AT3G22750	protein kinase, putative	0.821673	1.76745	7.93341	244.453	11.6619	1.25411e-06	0.000102544
257763_s_at	12863	AT3G23120;AT3G23110	[AT3G23120, leucine-rich repeat family protein];[AT3G23110, disease resistance family protein]	0.82121	1.76689	5.47763	44.5585	5.33405	0.000518985	0.00588665
260744_at	15844	AT1G15010	similar to unknown protein [Arabidopsis thaliana] (TAIR:AT2G01300.1); similar to Os01g0121500 [Oryza sativa (japonica cultivar-group)] (GB:NP_001041876.1); similar to Os01g0121600 [Oryza sativa (japonica cultivar-group)] (GB:NP_001041877.1)	0.820366	1.76585	5.66141	50.6119	11.8443	1.10292e-06	9.52941e-05
254914_at	10014	AT4G11290	peroxidase, putative	0.820307	1.76578	8.10409	275.153	7.85714	3.00456e-05	0.000819784
251443_at	6543	AT3G59940	kelch repeat-containing F-box family protein	0.819202	1.76443	10.6478	1604.38	14.573	1.94743e-07	3.06351e-05
249824_at	4924	AT5G23380	similar to unknown protein [Arabidopsis thaliana] (TAIR:AT1G03610.1); similar to hypothetical protein [Oryza sativa (japonica cultivar-group)] (GB:AAO39871.1); similar to Os01g0513400 [Oryza sativa (japonica cultivar-group)] (GB:NP_001043182.1); similar to hypothetical protein [Oryza sativa (japonica cultivar-group)] (GB:AAP46235.1); contains InterPro domain Protein of unknown function DUF789; (I…	0.81848	1.76355	7.45857	175.895	14.0691	2.61943e-07	3.53545e-05
250475_at	5575	AT5G10180	AST68 (Sulfate transporter 2.1)	0.818287	1.76331	7.37906	166.463	6.58156	0.000115368	0.00198908
255941_at	11041	AT1G20350	ATTIM17-1 (Arabidopsis thaliana translocase inner membrane subunit 17-1); protein translocase	0.817679	1.76257	6.25988	76.6324	8.59153	1.4917e-05	0.000510897
256266_at	11366	AT3G12320	similar to unknown protein [Arabidopsis thaliana] (TAIR:AT5G06980.1); similar to ACI112 [Lycopersicon esculentum] (GB:AAY97870.1)	0.817545	1.7624	7.89369	237.814	12.4447	7.31511e-07	7.19214e-05
258114_at	13214	AT3G14660	CYP72A13 (cytochrome P450, family 72, subfamily A, polypeptide 13); oxygen binding	0.817238	1.76203	8.94984	494.503	9.21742	8.52404e-06	0.000352687
254707_at	9807	AT4G18010	IP5PII (INOSITOL POLYPHOSPHATE 5-PHOSPHATASE II); inositol-polyphosphate 5-phosphatase	0.816438	1.76105	7.46955	177.238	10.2869	3.51215e-06	0.000199545
248756_at	3856	AT5G47560	ATSDAT/ATTDT (TONOPLAST DICARBOXYLATE TRANSPORTER); malate transporter/ sodium:dicarboxylate symporter	0.816215	1.76078	9.31528	637.056	13.4423	3.84093e-07	4.7103e-05
260770_at	15870	AT1G49200	zinc finger (C3HC4-type RING finger) family protein	0.815903	1.7604	7.16624	143.633	5.70307	0.000325598	0.00422222
245349_at	449	AT4G16690	esterase/lipase/thioesterase family protein	0.814189	1.75831	10.2228	1194.99	12.4032	7.52124e-07	7.3004e-05
262803_at	17903	AT1G21000	zinc-binding family protein	0.812616	1.75639	8.73099	424.904	9.89358	4.82004e-06	0.000251016
259479_at	14579	AT1G19020	similar to unknown protein [Arabidopsis thaliana] (TAIR:AT3G48180.1); similar to conserved hypothetical protein [Medicago truncatula] (GB:ABE82379.1)	0.810748	1.75412	6.14554	70.7933	7.09835	6.54748e-05	0.00135648
248193_at	3293	AT5G54080	HGO (HOMOGENTISATE 1,2-DIOXYGENASE); homogentisate 1,2-dioxygenase	0.809664	1.7528	10.1791	1159.32	13.7929	3.09453e-07	3.98793e-05
258227_at	13327	AT3G15620	UVR3 (UV REPAIR DEFECTIVE 4)	0.805846	1.74817	8.00345	256.614	10.0225	4.33979e-06	0.000234351
260973_at	16073	AT1G53490	DNA binding	0.804626	1.74669	5.74984	53.8115	12.1274	9.06708e-07	8.33099e-05
249862_at	4962	AT5G22920	zinc finger (C3HC4-type RING finger) family protein	0.803417	1.74523	12.6466	6411.99	12.9182	5.35748e-07	5.76435e-05
254415_at	9515	AT4G21326	subtilase family protein	0.802605	1.74425	7.55795	188.438	6.32229	0.000155119	0.00244525
260662_at	15762	AT1G19540	isoflavone reductase, putative	0.802092	1.74363	6.76677	108.893	5.98382	0.000231208	0.00329616
262378_at	17478	AT1G72830	HAP2C (Heme activator protein (yeast) homolog 2C); transcription factor	0.801923	1.74342	6.71986	105.409	12.0944	9.27455e-07	8.39702e-05
262177_at	17277	AT1G74710	ICS1 (ISOCHORISMATE SYNTHASEI); isochorismate synthase	0.801363	1.74275	6.98467	126.647	8.64542	1.4197e-05	0.000497388
265670_s_at	20770	AT2G32190;AT2G32210	[AT2G32190, similar to unknown protein [Arabidopsis thaliana] (TAIR:AT2G32210.1); similar to conserved hypothetical protein [Medicago truncatula] (GB:ABD32591.1)];[AT2G32210, similar to unknown protein [Arabidopsis thaliana] (TAIR:AT2G32190.1); similar to conserved hypothetical protein [Medicago truncatula] (GB:ABD32591.1)]	0.8008	1.74207	6.02165	64.9678	5.41872	0.000465564	0.00543666
261211_at	16311	AT1G12780	UGE1 (UDP-D-glucose/UDP-D-galactose 4-epimerase 1); UDP-glucose 4-epimerase/ protein dimerization	0.800134	1.74126	12.1678	4601.17	11.9239	1.04337e-06	9.13793e-05
246988_at	2088	AT5G67340	armadillo/beta-catenin repeat family protein / U-box domain-containing protein	0.79983	1.7409	5.47527	44.4858	7.93314	2.78801e-05	0.000782221
262947_at	18047	AT1G75750	GASA1 (GAST1 PROTEIN HOMOLOG 1)	0.799282	1.74023	13.0109	8254.35	11.2979	1.62937e-06	0.000121662
256965_at	12065	AT3G13450	DIN4 (DARK INDUCIBLE 4); 3-methyl-2-oxobutanoate dehydrogenase (2-methylpropanoyl-transferring)	0.797773	1.73842	10.7623	1736.93	12.7419	6.00899e-07	6.26498e-05
254247_at	9347	AT4G23260	protein kinase family protein	0.796429	1.7368	5.08333	33.9028	5.41844	0.000465727	0.00543666
264745_at	19845	AT1G62180	APR2 (5'ADENYLYLPHOSPHOSULFATE REDUCTASE 2)	0.795602	1.7358	10.1407	1128.88	13.0764	4.83936e-07	5.41107e-05
258293_at	13393	AT3G23430	PHO1 (PHOSPHATE 1)	0.795601	1.7358	6.57507	95.3439	5.13451	0.000673103	0.00712128
267028_at	22128	AT2G38470	WRKY33 (WRKY DNA-binding protein 33); transcription factor	0.795264	1.73539	6.66639	101.574	9.36304	7.51731e-06	0.000328486
249632_at	4732	AT5G37170	O-methyltransferase family 2 protein	0.795175	1.73529	5.70732	52.2485	6.44937	0.000134029	0.00221857
248062_at	3162	AT5G55450	protease inhibitor/seed storage/lipid transfer protein (LTP) family protein	0.793188	1.7329	9.72849	848.336	7.14644	6.22089e-05	0.00130791
247793_at	2893	AT5G58650	similar to unknown protein [Arabidopsis thaliana] (TAIR:AT3G47295.1)	0.79156	1.73095	8.2754	309.845	8.11069	2.34606e-05	0.000695885
256321_at	11421	AT1G55020	LOX1 (Lipoxygenase 1); lipoxygenase	0.79131	1.73065	10.0639	1070.39	9.4226	7.14399e-06	0.000318893
258880_at	13980	AT3G06420	ATG8H (AUTOPHAGY 8H); microtubule binding	0.78906	1.72795	7.90902	240.355	10.0078	4.39204e-06	0.000234351
249752_at	4852	AT5G24660	similar to unknown protein [Arabidopsis thaliana] (TAIR:AT5G24655.1); similar to unknown protein [Brassica rapa subsp. pekinensis] (GB:AAQ92331.1)	0.786878	1.72534	7.30394	158.017	6.04789	0.000214143	0.00311053
250942_at	6042	AT5G03350	legume lectin family protein	0.786303	1.72465	9.73317	851.093	7.91339	2.8426e-05	0.000795579
265922_at	21022	AT2G18480	mannitol transporter, putative	0.786249	1.72458	7.14048	141.091	5.77771	0.000296969	0.00394977
259055_at	14155	AT3G03340	UNE6 (unfertilized embryo sac 6)	0.786191	1.72452	9.21204	593.062	8.78186	1.25395e-05	0.000451146
250279_at	5379	AT5G13200	GRAM domain-containing protein / ABA-responsive protein-related	0.785216	1.72335	6.47713	89.086	9.207	8.60158e-06	0.000353769
256096_at	11196	AT1G13650	similar to 18S pre-ribosomal assembly protein gar2-related [Arabidopsis thaliana] (TAIR:AT2G03810.3); similar to hypothetical protein [Trypanosoma cruzi strain CL Brener] (GB:XP_813437.1)	0.784325	1.72229	7.79904	222.713	7.03914	6.97581e-05	0.00141943
261243_at	16343	AT1G20180	similar to unknown protein [Arabidopsis thaliana] (TAIR:AT3G49070.1); similar to Protein of unknown function DUF677 [Medicago truncatula] (GB:ABE88938.1); contains InterPro domain Protein of unknown function DUF677; (InterPro:IPR007749)	0.784121	1.72204	5.02635	32.5898	6.41166	0.000139941	0.00226547
261901_at	17001	AT1G80920	J8; heat shock protein binding / unfolded protein binding	0.783586	1.7214	12.3578	5248.74	13.6038	3.47489e-07	4.30774e-05
266761_at	21861	AT2G47130	short-chain dehydrogenase/reductase (SDR) family protein	0.782191	1.71974	6.05041	66.2756	9.78484	5.27094e-06	0.000264824
260915_at	16015	AT1G02660	lipase class 3 family protein	0.78057	1.71781	7.67147	203.865	9.88259	4.86362e-06	0.000251563
253993_at	9093	AT4G26070	MEK1 (mitogen-activated protein kinase kinase 1); MAP kinase kinase/ kinase	0.776843	1.71338	7.3876	167.451	6.64512	0.000107424	0.00188925
256433_at	11533	AT3G10985	wound-responsive protein-related	0.776592	1.71308	10.1227	1114.9	8.48098	1.65234e-05	0.000551022
266335_at	21435	AT2G32440	KAO2 (ENT-KAURENOIC ACID HYDROXYLASE 2); oxygen binding	0.776053	1.71244	8.28133	311.12	14.1903	2.43704e-07	3.43088e-05
263096_at	18196	AT2G16060	AHB1 (ARABIDOPSIS HEMOGLOBIN 1)	0.77578	1.71212	6.36627	82.4967	7.29102	5.34184e-05	0.00118945
252117_at	7217	AT3G51430	YLS2 (yellow-leaf-specific gene 2); strictosidine synthase	0.774545	1.71065	8.52697	368.87	10.9808	2.05934e-06	0.000139446
250007_at	5107	AT5G18670	BMY3 (beta-amylase 3); beta-amylase	0.773786	1.70975	12.3359	5169.88	12.9604	5.21355e-07	5.63607e-05
255630_at	10730	AT4G00700	C2 domain-containing protein	0.77359	1.70952	5.17022	36.0074	9.08142	9.60001e-06	0.000382238
250798_at	5898	AT5G05340	peroxidase, putative	0.770555	1.70593	5.45415	43.8391	5.40045	0.000476564	0.00551889
255734_at	10834	AT1G25550	myb family transcription factor	0.770287	1.70561	8.0365	262.559	7.81043	3.1468e-05	0.000845935
267115_s_at	22215	AT2G32540;AT2G32530	[AT2G32540, ATCSLB04 (Cellulose synthase-like B4); transferase/ transferase, transferring glycosyl groups];[AT2G32530, ATCSLB03 (Cellulose synthase-like B3); transferase/ transferase, transferring glycosyl groups]	0.770276	1.7056	8.2014	294.352	12.9923	5.10764e-07	5.57862e-05
267076_at	22176	AT2G41090	calmodulin-like calcium-binding protein, 22 kDa (CaBP-22)	0.770159	1.70546	10.7133	1678.92	4.99123	0.000814113	0.00819502
258049_at	13149	AT3G16220	similar to nucleic acid binding [Arabidopsis thaliana] (TAIR:AT3G16230.1); similar to Os01g0231800 [Oryza sativa (japonica cultivar-group)] (GB:NP_001042498.1); similar to At3g16220-related [Medicago truncatula] (GB:ABE80927.1); similar to Os01g0231900 [Oryza sativa (japonica cultivar-group)] (GB:NP_001042499.1); contains InterPro domain Predicted eukaryotic LigT; (InterPro:IPR009210)	0.768771	1.70382	8.19847	293.755	11.0798	1.91296e-06	0.000132628
266984_at	22084	AT2G39570	ACT domain-containing protein	0.767496	1.70231	10.8639	1863.69	14.643	1.8703e-07	2.9747e-05
262482_at	17582	AT1G17020	SRG1 (SENESCENCE-RELATED GENE 1); oxidoreductase, acting on paired donors, with incorporation or reduction of molecular oxygen, 2-oxoglutarate as one donor, and incorporation of one atom each of oxygen into both donors	0.764768	1.6991	5.63209	49.594	6.46107	0.00013225	0.00219711
267393_at	22493	AT2G44500	similar to unknown protein [Arabidopsis thaliana] (TAIR:AT3G07900.1); similar to Plant protein family, putative [Medicago truncatula] (GB:ABE79402.1); similar to H+-transporting two-sector ATPase, delta (OSCP) subunit; Hypothetical plant protein [Medicago truncatula] (GB:ABE83885.1); contains InterPro domain Protein of unknown function DUF246, plant; (InterPro:IPR004348)	0.764506	1.69879	8.45641	351.265	13.6307	3.41772e-07	4.28341e-05
260396_at	15496	AT1G69720	HO3 (HEME OXYGENASE 3); heme oxygenase (decyclizing)	0.762885	1.69688	7.33426	161.373	7.04491	6.93277e-05	0.00141446
265414_at	20514	AT2G16660	nodulin family protein	0.762404	1.69632	10.1027	1099.56	13.1591	4.59066e-07	5.2096e-05
266756_at	21856	AT2G46950	CYP709B2 (cytochrome P450, family 709, subfamily B, polypeptide 2); oxygen binding	0.76238	1.69629	8.23496	301.28	4.95493	0.000854704	0.00846909
250208_at	5308	AT5G14000	ANAC084 (Arabidopsis NAC domain containing protein 84); transcription factor	0.757979	1.69112	8.23322	300.916	11.0469	1.96029e-06	0.000134681
262134_at	17234	AT1G77990	AST56 (sulphate transporter 2;2); sulfate transporter	0.756023	1.68883	7.83515	228.357	11.9557	1.02061e-06	9.07127e-05
245119_at	219	AT2G41640	similar to unknown protein [Arabidopsis thaliana] (TAIR:AT3G57380.1); similar to glycosyltransferase [Medicago truncatula] (GB:CAI30145.1); contains InterPro domain Protein of unknown function DUF563; (InterPro:IPR007657)	0.75407	1.68654	5.71878	52.6652	5.55108	0.000393635	0.00485079
260012_at	15112	AT1G67865	similar to unknown protein [Arabidopsis thaliana] (TAIR:AT1G67860.1)	0.753612	1.68601	9.61321	783.188	9.33768	7.68278e-06	0.000330027
245794_at	894	AT1G32170	XTR4 (XYLOGLUCAN ENDOTRANSGLYCOSYLASE 4); hydrolase, acting on glycosyl bonds	0.752778	1.68503	8.02026	259.62	7.93735	2.77654e-05	0.000780923
253125_at	8225	AT4G36040	DNAJ heat shock N-terminal domain-containing protein (J11)	0.749813	1.68158	13.0849	8688.83	13.4026	3.93727e-07	4.77708e-05
264836_at	19936	AT1G03610	similar to unknown protein [Arabidopsis thaliana] (TAIR:AT4G03420.1); similar to Os10g0494000 [Oryza sativa (japonica cultivar-group)] (GB:NP_001064942.1); similar to hypothetical protein [Oryza sativa (japonica cultivar-group)] (GB:AAP46235.1); contains InterPro domain Protein of unknown function DUF789; (InterPro:IPR008507)	0.749074	1.68071	9.26273	614.271	11.93	1.03896e-06	9.13793e-05
258209_at	13309	AT3G14060	similar to unknown protein [Arabidopsis thaliana] (TAIR:AT1G54120.1)	0.747739	1.67916	7.54133	186.28	9.0238	1.01004e-05	0.00039586
264102_at	19202	AT1G79270	ECT8 (evolutionarily conserved C-terminal region 8)	0.74756	1.67895	7.53015	184.842	5.76037	0.000303366	0.00399945
245306_at	406	AT4G14690	ELIP2 (EARLY LIGHT-INDUCIBLE PROTEIN 2); chlorophyll binding	0.74585	1.67696	8.66868	406.943	6.66873	0.000104628	0.00185435
259364_at	14464	AT1G13260	RAV1 (Related to ABI3/VP1 1); DNA binding / transcription factor	0.742702	1.67331	6.06532	66.9641	9.43784	7.05182e-06	0.000315396
263852_at	18952	AT2G04450	ATNUDT6 (Arabidopsis thaliana Nudix hydrolase homolog 6); ADP-ribose diphosphatase/ NAD binding / hydrolase	0.741569	1.67199	6.41006	85.0395	4.53062	0.00153106	0.01288
256324_at	11424	AT1G66760	MATE efflux family protein	0.740211	1.67042	8.78981	442.584	11.1213	1.85498e-06	0.000130997
262656_at	17756	AT1G14200	zinc finger (C3HC4-type RING finger) family protein	0.739745	1.66988	7.83107	227.712	11.1015	1.88237e-06	0.00013139
249719_at	4819	AT5G35735	auxin-responsive family protein	0.738952	1.66896	7.36378	164.709	4.78341	0.00107841	0.0100075
267461_at	22561	AT2G33830	dormancy/auxin associated family protein	0.738885	1.66889	13.0244	8331.8	13.0249	5.00177e-07	5.51161e-05
247356_at	2456	AT5G63800	BGAL6 (beta-galactosidase 6); beta-galactosidase	0.738562	1.66851	9.0283	522.144	11.3005	1.62631e-06	0.000121662
263106_at	18206	AT2G05160	zinc finger (CCCH-type) family protein / RNA recognition motif (RRM)-containing protein	0.738453	1.66839	7.12283	139.376	7.89195	2.90316e-05	0.000804012
254561_at	9661	AT4G19160	binding	0.737237	1.66698	10.7755	1752.86	13.4226	3.8885e-07	4.74314e-05
257830_at	12930	AT3G26690	ATNUDT13 (ARABIDOPSIS THALIANA NUDIX HYDROLASE HOMOLOG 13); hydrolase	0.73656	1.6662	7.58939	192.59	12.1531	8.90948e-07	8.22774e-05
255543_at	10643	AT4G01870	tolB protein-related	0.734595	1.66393	8.3223	320.083	11.688	1.23116e-06	0.000102476
254954_at	10054	AT4G10920;AT4G10910	[AT4G10920, KELP];[AT4G10910, unknown protein]	0.732973	1.66206	6.79076	110.719	7.67322	3.60927e-05	0.000921711
261564_at	16664	AT1G01720	ATAF1 (Arabidopsis NAC domain containing protein 2); transcription factor	0.732787	1.66185	9.86671	933.633	10.2881	3.50887e-06	0.000199545
254657_s_at	9757	AT4G18220;AT4G18210	[AT4G18220, purine permease family protein];[AT4G18210, ATPUP10 (Arabidopsis thaliana purine permease 10); purine transporter]	0.732705	1.66175	6.71548	105.09	9.34413	7.64031e-06	0.000330027
247696_at	2796	AT5G59780	MYB59 (myb domain protein 59); DNA binding / transcription factor	0.731553	1.66043	6.14704	70.8668	8.0881	2.39774e-05	0.000706995
261135_at	16235	AT1G19610	LCR78/PDF1.4 (Low-molecular-weight cysteine-rich 78)	0.731402	1.66025	5.08613	33.9685	10.1916	3.78829e-06	0.000211273
267550_at	22650	AT2G32800	AP4.3A; ATP binding / protein kinase	0.731139	1.65995	7.66299	202.67	5.71858	0.000319412	0.00414908
245734_at	834	AT1G73480	hydrolase, alpha/beta fold family protein	0.730757	1.65951	7.80944	224.323	10.09	4.10968e-06	0.0002248
254694_at	9794	no_match	no_match	0.730018	1.65866	8.4107	340.309	12.9846	5.13293e-07	5.57862e-05
264339_at	19439	AT1G70290	ATTPS8 (Arabidopsis thaliana trehalose phosphatase/synthase 8); transferase, transferring glycosyl groups	0.72969	1.65828	9.80235	892.897	11.071	1.92548e-06	0.000133091
267592_at	22692	AT2G39710	aspartyl protease family protein	0.728958	1.65744	6.67814	102.405	6.90094	8.0999e-05	0.00155898
257635_at	12735	AT3G26280	CYP71B4 (cytochrome P450, family 71, subfamily B, polypeptide 4); oxygen binding	0.727919	1.65625	4.93879	30.6708	8.61222	1.46359e-05	0.000503537
255255_at	10355	AT4G05070	similar to wound induced protein-like [Vitis vinifera] (GB:AAO12870.1)	0.727813	1.65613	9.65281	804.983	9.6239	6.02617e-06	0.000285632
262001_at	17101	AT1G33790	jacalin lectin family protein	0.727177	1.6554	7.17653	144.661	7.56545	4.02504e-05	0.000981471
246821_at	1921	AT5G26920	calmodulin binding	0.72585	1.65388	5.38483	41.7827	4.71513	0.0011844	0.0107549
253872_at	8972	AT4G27410	RD26 (RESPONSIVE TO DESSICATION 26); transcription factor	0.725548	1.65353	7.88084	235.705	11.2779	1.65333e-06	0.000122443
266021_at	21121	AT2G05910	similar to unknown protein [Arabidopsis thaliana] (TAIR:AT5G20640.1); similar to Os03g0179700 [Oryza sativa (japonica cultivar-group)] (GB:NP_001049157.1); similar to Protein of unknown function DUF567 [Medicago truncatula] (GB:ABE88870.1); similar to Os04g0446000 [Oryza sativa (japonica cultivar-group)] (GB:NP_001052906.1); contains InterPro domain Protein of unknown function DUF567; (InterPro:I…	0.722476	1.65001	5.51068	45.5912	6.44945	0.000134017	0.00221857
267238_at	22338	AT2G44130;AT2G44140	[AT2G44130, kelch repeat-containing F-box family protein];[AT2G44140, autophagy 4a (APG4a)]	0.722086	1.64957	11.1622	2291.68	13.1278	4.68324e-07	5.2623e-05
247072_at	2172	AT5G66490	similar to unknown protein [Arabidopsis thaliana] (TAIR:AT3G50900.1); similar to hypothetical protein [Thellun (GB:ABB45855.1)	0.721632	1.64905	7.45413	175.355	8.78255	1.25317e-05	0.000451146
264261_at	19361	AT1G09240	nicotianamine synthase, putative	0.721155	1.6485	5.24974	38.0478	10.1207	4.00953e-06	0.000220912
252751_at	7851	AT3G43430	zinc finger (C3HC4-type RING finger) family protein	0.720999	1.64832	6.47458	88.9291	6.67604	0.000103778	0.00184894
252462_at	7562	AT3G47250	similar to unknown protein [Arabidopsis thaliana] (TAIR:AT3G47200.2); similar to hypothetical protein LOC_Os12g29620 [Oryza sativa (japonica cultivar-group)] (GB:ABA98257.1); similar to Os11g0543300 [Oryza sativa (japonica cultivar-group)] (GB:NP_001068043.1); similar to Os04g0505400 [Oryza sativa (japonica cultivar-group)] (GB:NP_001053253.1); contains InterPro domain Protein of unknown function…	0.720422	1.64766	8.29662	314.435	9.67966	5.75175e-06	0.000278551
265136_at	20236	AT1G51270	structural molecule	0.720293	1.64752	4.64651	25.046	10.2971	3.48394e-06	0.00019917
254665_at	9765	AT4G18340	glycosyl hydrolase family 17 protein	0.719993	1.64717	6.36393	82.3634	5.67659	0.000336468	0.00430687
254691_at	9791	AT4G17840	similar to unknown protein [Arabidopsis thaliana] (TAIR:AT2G35260.1); similar to hypothetical protein 23.t00040 [Brassica oleracea] (GB:ABD65626.1); similar to hypothetical protein 40.t00061 [Brassica oleracea] (GB:ABD65174.1)	0.719516	1.64663	9.69117	826.673	11.4086	1.5035e-06	0.000115084
253401_at	8501	AT4G32870	similar to unknown protein [Arabidopsis thaliana] (TAIR:AT2G25770.2); similar to conserved hypothetical protein [Medicago truncatula] (GB:ABE78384.1); contains domain Bet v1-like (SSF55961); contains domain no description (G3D.3.30.530.20)	0.718125	1.64504	5.9907	63.5888	7.43721	4.58969e-05	0.00107265
267080_at	22180	AT2G41190	amino acid transporter family protein	0.717447	1.64427	6.99853	127.87	10.4722	3.03634e-06	0.000180833
246755_at	1855	AT5G27920	F-box family protein	0.717148	1.64393	8.95872	497.559	11.1998	1.75063e-06	0.000126768
247554_at	2654	AT5G61010	ATEXO70E2 (EXOCYST SUBUNIT EXO70 FAMILY PROTEIN E2); protein binding	0.716649	1.64336	5.84062	57.3062	6.33361	0.000153101	0.00241677
249869_at	4969	AT5G23050	acyl-activating enzyme 17 (AAE17)	0.714777	1.64123	9.29791	629.435	10.8853	2.21233e-06	0.000146034
261335_at	16435	AT1G44800	nodulin MtN21 family protein	0.713284	1.63953	8.61238	391.368	8.39746	1.78635e-05	0.000576332
253305_at	8405	AT4G33666	unknown protein	0.711953	1.63802	10.1198	1112.63	8.91534	1.11222e-05	0.000412791
246018_at	1118	AT5G10695	similar to unknown protein [Arabidopsis thaliana] (TAIR:AT5G57123.1); similar to conserved hypothetical protein [Medicago truncatula] (GB:ABD28467.1); contains domain Glucocorticoid receptor-like (DNA-binding domain) (SSF57716)	0.710115	1.63593	7.44728	174.524	6.14884	0.000189977	0.00285716
246012_at	1112	AT5G10650	zinc finger (C3HC4-type RING finger) family protein	0.707734	1.63324	7.03711	131.335	7.77189	3.26975e-05	0.000872316
261576_at	16676	AT1G01070	nodulin MtN21 family protein	0.707508	1.63298	8.33154	322.138	5.8343	0.000277089	0.00376409
259911_at	15011	AT1G72680	cinnamyl-alcohol dehydrogenase, putative	0.706944	1.63234	7.95364	247.904	12.4507	7.28566e-07	7.19214e-05
266140_at	21240	AT2G28120	nodulin family protein	0.705919	1.63118	8.0205	259.664	9.41344	7.2001e-06	0.000320145
266583_at	21683	AT2G46220	similar to unknown protein [Arabidopsis thaliana] (TAIR:AT1G16320.1); similar to hypothetical protein Npun02005080 [Nostoc punctiforme PCC 73102] (GB:ZP_00108317.1); similar to Os05g0215600 [Oryza sativa (japonica cultivar-group)] (GB:NP_001054933.1); similar to Os04g0613300 [Oryza sativa (japonica cultivar-group)] (GB:NP_001053853.1); contains domain NTF2-like (SSF54427)	0.704638	1.62974	10.2627	1228.55	12.9837	5.13595e-07	5.57862e-05
255568_at	10668	AT4G01250	WRKY22 (WRKY DNA-binding protein 22); transcription factor	0.704292	1.62934	5.98077	63.1526	6.60545	0.000112309	0.00194664
258813_at	13913	AT3G04060	ANAC046 (Arabidopsis NAC domain containing protein 46); transcription factor	0.702536	1.62736	5.63298	49.6244	7.56586	4.02335e-05	0.000981471
251066_at	6166	AT5G01880	zinc finger (C3HC4-type RING finger) family protein	0.70209	1.62686	8.1914	292.319	9.51747	6.59099e-06	0.000301284
256366_at	11466	AT1G66880	serine/threonine protein kinase family protein	0.701789	1.62652	6.60573	97.3921	7.34764	5.03559e-05	0.00114177
265214_at	20314	AT1G05000	tyrosine specific protein phosphatase family protein	0.701351	1.62603	6.33785	80.8878	7.13724	6.28194e-05	0.0013146
249306_at	4406	AT5G41400	zinc finger (C3HC4-type RING finger) family protein	0.699036	1.62342	6.49077	89.9325	7.82529	3.10076e-05	0.000837022
258225_at	13325	AT3G15630	similar to unknown protein [Arabidopsis thaliana] (TAIR:AT1G52720.1); similar to conserved hypothetical protein [Medicago truncatula] (GB:ABE92597.1)	0.695506	1.61945	11.6285	3166.2	11.5549	1.3534e-06	0.000107832
263799_at	18899	AT2G24550	similar to unknown protein [Arabidopsis thaliana] (TAIR:AT4G31510.1); similar to putative KID-containing protein [Brassica napus] (GB:AAO53442.1)	0.695286	1.61921	7.19383	146.406	8.83067	1.19994e-05	0.000439036
252976_s_at	8076	AT4G38550	similar to unknown protein [Arabidopsis thaliana] (TAIR:AT2G20950.3); similar to pEARLI 4 gene product (GB:AAC37472.1); contains InterPro domain Arabidopsis phospholipase-like; (InterPro:IPR007942)	0.694341	1.61814	8.04774	264.613	4.49563	0.00160834	0.0133356
253647_at	8747	AT4G29950	microtubule-associated protein	0.693172	1.61683	9.39948	675.347	11.4435	1.46605e-06	0.000113358
250937_at	6037	AT5G03230	similar to unknown protein [Arabidopsis thaliana] (TAIR:AT5G60680.1); similar to Protein of unknown function DUF584 [Medicago truncatula] (GB:ABD32800.1); contains InterPro domain Protein of unknown function DUF584; (InterPro:IPR007608)	0.692686	1.61629	8.40511	338.994	9.25631	8.24137e-06	0.000346198
264614_s_at	19714	AT1G02590;AT1G04580	[AT1G02590, aldehyde oxidase, putative];[AT1G04580, AAO4 (ALDEHYDE OXIDASE 4); aldehyde oxidase]	0.692298	1.61585	7.62683	197.653	12.5866	6.65608e-07	6.74778e-05
260919_at	16019	no_match	no_match	0.692086	1.61562	5.42127	42.8515	10.6776	2.59067e-06	0.000163241
253643_at	8743	AT4G29780	similar to unknown protein [Arabidopsis thaliana] (TAIR:AT5G12010.1); similar to Os01g0582600 [Oryza sativa (japonica cultivar-group)] (GB:NP_001043414.1); similar to Os05g0593000 [Oryza sativa (japonica cultivar-group)] (GB:NP_001056499.1); similar to unknown protein [Oryza sativa (japonica cultivar-group)] (GB:BAD72250.1)	0.689162	1.61235	7.21085	148.143	7.49844	4.30991e-05	0.00102834
263776_s_at	18876	AT2G46430;AT2G46440	[AT2G46430, ATCNGC3 (CYCLIC NUCLEOTIDE GATED CHANNEL 3); calmodulin binding / cyclic nucleotide binding / ion channel];[AT2G46440, ATCNGC11 (cyclic nucleotide gated channel 11); calmodulin binding / cyclic nucleotide binding / ion channel]	0.687145	1.61009	5.97455	62.8808	4.80998	0.00103998	0.0097381
259560_at	14660	AT1G21270	WAK2 (wall-associated kinase 2); protein serine/threonine kinase	0.686946	1.60987	5.89626	59.5596	4.43971	0.00174068	0.0141248
252450_s_at	7550	AT3G47090;AT3G47580	[AT3G47090, leucine-rich repeat transmembrane protein kinase, putative];[AT3G47580, leucine-rich repeat transmembrane protein kinase, putative]	0.686811	1.60972	5.10513	34.419	7.3508	5.01908e-05	0.00113966
261958_at	17058	AT1G64500	glutaredoxin family protein	0.686651	1.60954	8.31032	317.435	8.67537	1.38134e-05	0.000486771
256772_at	11872	AT3G13750	BGAL1 (BETA GALACTOSIDASE 1); beta-galactosidase	0.684361	1.60699	12.1934	4683.75	11.2303	1.7119e-06	0.000124756
259979_at	15079	AT1G76600	similar to unknown protein [Arabidopsis thaliana] (TAIR:AT1G21010.1); similar to TMV response-related gene product [Nicotiana tabacum] (GB:BAB41200.1)	0.684334	1.60696	7.80747	224.017	9.49867	6.69669e-06	0.000304286
264379_at	19479	AT2G25200	similar to unknown protein [Arabidopsis thaliana] (TAIR:AT5G11000.1); similar to Os08g0439600 [Oryza sativa (japonica cultivar-group)] (GB:NP_001061898.1); similar to unknown protein [Oryza sativa (japonica cultivar-group)] (GB:BAD28921.1); contains InterPro domain Protein of unknown function DUF868, plant; (InterPro:IPR008586)	0.681474	1.60378	5.92008	60.5511	6.81953	8.85419e-05	0.00165138
262049_at	17149	AT1G80180	similar to unknown protein [Arabidopsis thaliana] (TAIR:AT1G15400.3); similar to Os06g0601100 [Oryza sativa (japonica cultivar-group)] (GB:NP_001058003.1); similar to Os01g0174100 [Oryza sativa (japonica cultivar-group)] (GB:NP_001042161.1)	0.681346	1.60364	8.90195	478.36	10.9769	2.06529e-06	0.000139446
251722_at	6822	AT3G56200	amino acid transporter family protein	0.680432	1.60262	7.58794	192.397	10.2488	3.61981e-06	0.000203871
262607_at	17707	AT1G13990	similar to Os03g0168200 [Oryza sativa (japonica cultivar-group)] (GB:NP_001049088.1)	0.678868	1.60088	8.81897	451.621	9.78182	5.28408e-06	0.000264901
249955_at	5055	AT5G18840	sugar transporter, putative	0.678717	1.60072	9.31228	635.735	9.66687	5.81343e-06	0.0002804
263019_at	18119	AT1G23870	ATTPS9 (Arabidopsis thaliana trehalose-phosphatase/synthase 9); transferase, transferring glycosyl groups / trehalose-phosphatase	0.678668	1.60066	8.48372	357.977	7.19695	5.89691e-05	0.00127015
263379_at	18479	AT2G40140	CZF1/ZFAR1; transcription factor	0.678582	1.60057	8.67939	409.973	9.81886	5.12503e-06	0.000259782
263194_at	18294	AT1G36060	AP2 domain-containing transcription factor, putative	0.678402	1.60037	6.38657	83.6662	9.50671	6.65126e-06	0.000302825
262082_s_at	17182	AT1G56140;AT1G56130;AT1G56120	[AT1G56140, leucine-rich repeat family protein / protein kinase family protein];[AT1G56130, leucine-rich repeat family protein / protein kinase family protein];[AT1G56120, leucine-rich repeat family protein / protein kinase family protein]	0.678398	1.60036	8.17375	288.766	10.3635	3.30608e-06	0.0001914
262916_at	18016	AT1G59700	ATGSTU16 (Arabidopsis thaliana Glutathione S-transferase (class tau) 16); glutathione transferase	0.678348	1.60031	7.14011	141.054	7.95875	2.71895e-05	0.000772345
247149_at	2249	AT5G65660	hydroxyproline-rich glycoprotein family protein	0.678173	1.60011	11.0873	2175.75	11.3761	1.53935e-06	0.000116653
249481_at	4581	AT5G38900	DSBA oxidoreductase family protein	0.677119	1.59894	5.36665	41.2594	4.85284	0.000981043	0.00936285
254688_at	9788	AT4G13830	J20 (DNAJ-LIKE 20); heat shock protein binding	0.675991	1.59769	9.70306	833.514	12.0496	9.5646e-07	8.58931e-05
257061_at	12161	AT3G18250	unknown protein	0.675433	1.59708	5.992	63.646	8.13421	2.29353e-05	0.000689385
267546_at	22646	AT2G32680	disease resistance family protein	0.674371	1.5959	5.67967	51.2567	4.21173	0.00241414	0.0179487
265276_at	20376	AT2G28400	similar to unknown protein [Arabidopsis thaliana] (TAIR:AT5G60680.1); similar to Protein of unknown function DUF584 [Medicago truncatula] (GB:ABE80969.1); contains InterPro domain Protein of unknown function DUF584; (InterPro:IPR007608)	0.673626	1.59508	8.32692	321.11	8.34946	1.86875e-05	0.000595338
248611_at	3711	AT5G49520	WRKY48 (WRKY DNA-binding protein 48); transcription factor	0.672808	1.59417	6.43116	86.2921	9.40418	7.25722e-06	0.000321431
258497_at	13597	AT3G02380	COL2 (CONSTANS-LIKE 2); transcription factor/ zinc ion binding	0.67136	1.59257	9.23875	604.143	10.6293	2.68853e-06	0.000165512
263318_at	18418	AT2G24762	similar to GDU1 (GLUTAMINE DUMPER 1) [Arabidopsis thaliana] (TAIR:AT4G31730.1); similar to At5g57685 [Medicago truncatula] (GB:ABE81292.1)	0.66887	1.58983	8.13749	281.597	7.88319	2.92833e-05	0.000809639
253779_at	8879	AT4G28490	HAESA (RECEPTOR-LIKE PROTEIN KINASE 5); ATP binding / kinase/ protein serine/threonine kinase	0.668132	1.58901	7.08158	135.446	8.97602	1.05372e-05	0.00040059
261395_at	16495	AT1G79700	ovule development protein, putative	0.668086	1.58896	9.52142	734.909	9.6334	5.9784e-06	0.000285213
255733_at	10833	AT1G25400	similar to unknown protein [Arabidopsis thaliana] (TAIR:AT1G68440.1); similar to IMP dehydrogenase/GMP reductase [Medicago truncatula] (GB:ABE93249.1)	0.666003	1.58667	6.9027	119.652	7.24454	5.60857e-05	0.00122189
264746_at	19846	AT1G62300	WRKY6 (WRKY DNA-binding protein 6); transcription factor	0.665638	1.58627	5.93636	61.2383	6.16142	0.00018718	0.00282941
259197_at	14297	AT3G03670	peroxidase, putative	0.665578	1.5862	6.14449	70.742	8.97844	1.05146e-05	0.000400495
252991_at	8091	AT4G38470	protein kinase family protein	0.664401	1.58491	9.42809	688.871	9.00289	1.02891e-05	0.000398992
260211_at	15311	AT1G74440	similar to unknown protein [Arabidopsis thaliana] (TAIR:AT1G18720.1); similar to YGL010w-like protein [Picea mariana] (GB:AAC32136.1); contains InterPro domain Protein of unknown function DUF962; (InterPro:IPR009305)	0.663527	1.58395	7.24487	151.679	8.63301	1.43593e-05	0.000499293
263460_at	18560	AT2G31810	acetolactate synthase small subunit, putative	0.663491	1.58391	10.107	1102.86	11.9537	1.02206e-06	9.07127e-05
246028_at	1128	AT5G21170	5'-AMP-activated protein kinase beta-2 subunit, putative	0.66308	1.58346	10.4114	1361.92	9.90481	4.77598e-06	0.000250504
255742_at	10842	AT1G25560	AP2 domain-containing transcription factor, putative	0.662157	1.58245	7.85377	231.324	7.99135	2.63377e-05	0.000752835
264658_at	19758	AT1G09910	lyase	0.661341	1.58155	7.81295	224.87	9.69302	5.68807e-06	0.000277508
250580_at	5680	AT5G07440	GDH2 (GLUTAMATE DEHYDROGENASE 2); oxidoreductase	0.660254	1.58036	10.0248	1041.74	10.856	2.26186e-06	0.000147831
254243_at	9343	AT4G23210	protein kinase family protein	0.659499	1.57953	5.05749	33.3009	5.09618	0.000708028	0.00740492
249923_at	5023	AT5G19120	pepsin A	0.65839	1.57832	11.9923	4074.13	11.1229	1.85282e-06	0.000130997
260037_at	15137	AT1G68840	RAV2 (REGULATOR OF THE ATPASE OF THE VACUOLAR MEMBRANE); DNA binding / transcription factor	0.657291	1.57712	6.11684	69.3988	7.77009	3.27562e-05	0.000872861
264301_at	19401	AT1G78780	pathogenesis-related family protein	0.657053	1.57686	8.26079	306.723	6.39482	0.000142672	0.00229451
252131_at	7231	AT3G50930	AAA-type ATPase family protein	0.656611	1.57638	5.28622	39.0222	7.38768	4.83063e-05	0.00111408
251704_at	6804	AT3G56360	similar to unknown protein [Arabidopsis thaliana] (TAIR:AT5G05250.1); similar to unknown protein [Oryza sativa (japonica cultivar-group)] (GB:AAP03420.1)	0.655203	1.57484	9.65733	807.508	8.03831	2.51616e-05	0.000732992
247882_at	2982	AT5G57785	contains InterPro domain Helix-loop-helix DNA-binding; (InterPro:IPR011598)	0.65449	1.57406	9.58345	767.193	11.6035	1.30721e-06	0.000106112
258091_at	13191	AT3G14560	unknown protein	0.653848	1.57336	8.63101	396.454	5.51393	0.000412516	0.00498903
247585_at	2685	AT5G60680	similar to unknown protein [Arabidopsis thaliana] (TAIR:AT3G45210.1); similar to Protein of unknown function DUF584 [Medicago truncatula] (GB:ABE80969.1); contains InterPro domain Protein of unknown function DUF584; (InterPro:IPR007608)	0.65321	1.57266	10.586	1537.1	9.71341	5.59237e-06	0.000276108
254211_at	9311	AT4G23570	SGT1A (Suppressor of G2 (Two) 1A); binding	0.652728	1.57214	8.37132	331.144	11.5516	1.35657e-06	0.000107832
260656_at	15756	AT1G19380	similar to unknown protein [Arabidopsis thaliana] (TAIR:AT5G65650.1); similar to unknown [Vitis pseudoreticulata] (GB:ABC69762.1); contains InterPro domain Protein of unknown function DUF1195; (InterPro:IPR010608)	0.652353	1.57173	7.9336	244.485	7.41879	4.67773e-05	0.00108766
254787_at	9887	AT4G12690	similar to unknown protein [Arabidopsis thaliana] (TAIR:AT2G04220.1); similar to Protein of unknown function DUF868, plant [Medicago truncatula] (GB:ABE92686.1); contains InterPro domain Protein of unknown function DUF868, plant; (InterPro:IPR008586)	0.651832	1.57116	6.19838	73.4341	8.46307	1.68012e-05	0.000554609
255521_at	10621	AT4G02280	SUS3; UDP-glycosyltransferase/ sucrose synthase/ transferase, transferring glycosyl groups	0.651544	1.57085	5.99433	63.749	7.05692	6.84401e-05	0.00140411
249774_at	4874	AT5G24150	SQP1 (Squalene monooxygenase 1)	0.64954	1.56867	8.88408	472.47	7.15351	6.17439e-05	0.00130526
254952_at	10052	AT4G10955;AT4G10960	[AT4G10955, lipase class 3 family protein];[AT4G10960, UGE5 (UDP-D-glucose/UDP-D-galactose 4-epimerase 5); UDP-glucose 4-epimerase/ protein dimerization]	0.648987	1.56807	7.5582	188.471	8.11821	2.32911e-05	0.000695381
261986_s_at	17086	AT1G33730;AT1G33720	[AT1G33730, CYP76C5 (cytochrome P450, family 76, subfamily C, polypeptide 5); oxygen binding];[AT1G33720, CYP76C6 (cytochrome P450, family 76, subfamily C, polypeptide 6); oxygen binding]	0.648642	1.56769	5.1423	35.3171	5.58883	0.000375399	0.00468684
251497_at	6597	AT3G59060	PIL6 (PHYTOCHROME-INTERACTING FACTOR 5); DNA binding / transcription factor	0.647637	1.5666	7.89037	237.267	9.07895	9.6209e-06	0.000382238
252053_at	7153	AT3G52400	SYP122 (syntaxin 122); t-SNARE	0.647274	1.56621	6.03934	65.7691	5.00739	0.000796715	0.00808051
262408_at	17508	AT1G34750	protein phosphatase 2C, putative / PP2C, putative	0.646433	1.56529	7.00954	128.849	5.40032	0.000476643	0.00551889
246195_at	1295	AT4G36410	UBC17 (UBIQUITIN-CONJUGATING ENZYME 17); ubiquitin-protein ligase	0.646364	1.56522	7.36199	164.506	7.50761	4.26965e-05	0.00102095
267135_at	22235	AT2G23430	ICK1 (KIP-RELATED PROTEIN 1)	0.645556	1.56434	6.75152	107.748	7.01321	7.1729e-05	0.00144334
260303_at	15403	AT1G70520	protein kinase family protein	0.644873	1.5636	8.86333	465.723	7.59444	3.90824e-05	0.000966265
246596_at	1696	AT5G14740	CA2 (BETA CARBONIC ANHYDRASE 2); carbonate dehydratase/ zinc ion binding	0.644534	1.56323	12.7447	6863.5	7.73535	3.39121e-05	0.000888099
251635_at	6735	AT3G57510	ADPG1 (endo-polygalacturonase 1); polygalacturonase	0.644327	1.56301	7.24327	151.51	4.6969	0.00121455	0.0109733
252563_at	7663	AT3G45970	ATEXLA1 (ARABIDOPSIS THALIANA EXPANSIN-LIKE A1)	0.642863	1.56142	10.0601	1067.57	9.51209	6.62102e-06	0.000302051
263184_at	18284	AT1G05560	UGT1 (UDP-glucosyl transferase 75B1); UDP-glycosyltransferase/ transferase, transferring glycosyl groups	0.641055	1.55947	8.12944	280.031	9.00139	1.03028e-05	0.000398992
249378_at	4478	AT5G40450	similar to unknown protein [Arabidopsis thaliana] (TAIR:AT3G28770.1); similar to erythrocyte membrane-associated (GB:AAF15293.3)	0.640591	1.55897	8.52076	367.285	10.7045	2.53779e-06	0.000161695
260556_at	15656	AT2G43620	chitinase, putative	0.640553	1.55893	6.94409	123.135	9.43889	7.04552e-06	0.000315396
245505_at	605	AT4G15690	glutaredoxin family protein	0.639257	1.55753	5.54765	46.7745	8.85874	1.17004e-05	0.000430463
247013_at	2113	AT5G67480	BT4 (BTB AND TAZ DOMAIN PROTEIN 4); protein binding / transcription regulator	0.638928	1.55717	10.4426	1391.7	11.7213	1.20254e-06	0.000101593
267624_at	22724	AT2G39660	BIK1 (BOTRYTIS-INDUCED KINASE1); kinase	0.637705	1.55585	7.65273	201.234	6.1196	0.000196656	0.00292993
260438_at	15538	AT1G68290	bifunctional nuclease, putative	0.637685	1.55583	6.76868	109.038	7.60632	3.86145e-05	0.000962889
255575_at	10675	AT4G01430	nodulin MtN21 family protein	0.636496	1.55455	9.00741	514.635	8.05056	2.48644e-05	0.000727125
246440_at	1540	AT5G17650	glycine/proline-rich protein	0.636263	1.5543	7.84891	230.546	7.81017	3.14763e-05	0.000845935
255649_at	10749	AT4G00920	COP1-interacting protein-related	0.635287	1.55325	5.74881	53.7731	5.95323	0.000239874	0.00338585
265573_at	20673	AT2G28200	nucleic acid binding / transcription factor/ zinc ion binding	0.635089	1.55303	8.21543	297.228	11.2935	1.63458e-06	0.000121662
260748_at	15848	AT1G49210	zinc finger (C3HC4-type RING finger) family protein	0.634948	1.55288	5.40456	42.3579	4.43252	0.00175851	0.0142341
257745_at	12845	AT3G29240	similar to unknown protein [Arabidopsis thaliana] (TAIR:AT1G33780.1); similar to Os10g0330400 [Oryza sativa (japonica cultivar-group)] (GB:NP_001064365.1); similar to Protein of unknown function DUF179 [Medicago truncatula] (GB:ABE94310.1); contains InterPro domain Protein of unknown function DUF179; (InterPro:IPR003774)	0.633501	1.55133	11.8019	3570.58	11.5466	1.36149e-06	0.000107832
266034_at	21134	AT2G06005	similar to unknown protein [Arabidopsis thaliana] (TAIR:AT5G20580.2); similar to Os02g0778300 [Oryza sativa (japonica cultivar-group)] (GB:NP_001048294.1); similar to unknown protein [Oryza sativa (japonica cultivar-group)] (GB:BAD16977.1); contains InterPro domain Prefoldin; (InterPro:IPR009053)	0.633492	1.55132	6.62402	98.6345	10.1851	3.80826e-06	0.000211869
263593_at	18693	AT2G01860	pentatricopeptide (PPR) repeat-containing protein	0.633245	1.55105	6.11465	69.2936	5.98848	0.000229919	0.00328188
266965_at	22065	AT2G39510	nodulin MtN21 family protein	0.631013	1.54865	9.76743	871.547	6.92497	7.89102e-05	0.00153317
262113_at	17213	AT1G02820	late embryogenesis abundant 3 family protein / LEA3 family protein	0.63063	1.54824	6.94468	123.185	9.34483	7.63575e-06	0.000330027
262986_at	18086	AT1G23390	kelch repeat-containing F-box family protein	0.630156	1.54773	10.9438	1969.81	8.96318	1.06581e-05	0.000402256
251642_at	6742	AT3G57520	ATSIP2 (ARABIDOPSIS THALIANA SEED IMBIBITION 2); hydrolase, hydrolyzing O-glycosyl compounds	0.629708	1.54725	11.839	3663.6	8.82211	1.20922e-05	0.000441319
257624_at	12724	AT3G26220	CYP71B3 (cytochrome P450, family 71, subfamily B, polypeptide 3); oxygen binding	0.629629	1.54717	4.5476	23.3865	7.9523	2.73618e-05	0.000774347
262072_at	17172	AT1G59590	ZCF37	0.629586	1.54712	5.56069	47.1992	8.18981	2.17446e-05	0.000662207
263956_at	19056	AT2G35940	BLH1 (BLH1); DNA binding / transcription factor	0.627865	1.54528	9.53987	744.365	6.82226	8.82766e-05	0.00165043
260046_at	15146	AT1G73800	calmodulin-binding protein	0.627435	1.54482	5.18844	36.465	4.11378	0.0027848	0.0197947
267134_at	22234	AT2G23450	protein kinase family protein	0.627423	1.5448	9.22797	599.646	10.4434	3.1054e-06	0.000183985
249010_at	4110	AT5G44580	similar to unknown protein [Arabidopsis thaliana] (TAIR:AT5G44582.1)	0.627096	1.54445	5.67437	51.0686	5.20512	0.000613538	0.00660542
262118_at	17218	AT1G02850	glycosyl hydrolase family 1 protein	0.625069	1.54228	8.60306	388.846	6.61205	0.00011148	0.00193521
247965_at	3065	AT5G56540	AGP14 (ARABINOGALACTAN PROTEIN 14)	0.624361	1.54153	8.91093	481.347	5.48872	0.000425891	0.00511202
248821_at	3921	AT5G47070	protein kinase, putative	0.623814	1.54094	7.90043	238.928	8.84053	1.18934e-05	0.000436858
251039_at	6139	AT5G02020	similar to unknown protein [Arabidopsis thaliana] (TAIR:AT5G59080.1)	0.62345	1.54056	8.42212	343.013	10.8164	2.33061e-06	0.000151889
251060_at	6160	AT5G01820	ATSR1 (SERINE/THREONINE PROTEIN KINASE 1); kinase	0.621974	1.53898	9.23837	603.984	6.82142	8.8358e-05	0.00165043
245757_at	857	AT1G35140	PHI-1 (PHOSPHATE-INDUCED 1)	0.621119	1.53807	5.76171	54.2559	5.31093	0.000534705	0.0059809
254432_at	9532	AT4G20830	FAD-binding domain-containing protein	0.620821	1.53775	7.79691	222.384	6.69841	0.000101225	0.00181663
251739_at	6839	AT3G56170	CAN (CA-2+ DEPENDENT NUCLEASE); nuclease	0.619599	1.53645	8.98734	507.526	8.76034	1.27861e-05	0.00045785
249784_at	4884	AT5G24280	ATP binding	0.619194	1.53602	7.46432	176.597	4.98035	0.000826051	0.00828958
245439_at	539	AT4G16670	similar to unknown protein [Arabidopsis thaliana] (TAIR:AT4G17350.1); similar to hypothetical protein 31.t00035 [Brassica oleracea] (GB:ABD65121.1); contains InterPro domain Pleckstrin-like, plant; (InterPro:IPR013666); contains InterPro domain Protein of unknown function DUF828, plant; (InterPro:IPR008546)	0.618864	1.53567	6.72412	105.721	9.12439	9.24467e-06	0.000371906
266071_at	21171	AT2G18680	similar to unknown protein [Arabidopsis thaliana] (TAIR:AT2G18690.1); similar to Os08g0107100 [Oryza sativa (japonica cultivar-group)] (GB:NP_001060795.1); similar to conserved hypothetical protein [Medicago truncatula] (GB:ABE90086.1)	0.617801	1.53453	4.61829	24.5609	5.4238	0.000462549	0.00541627
254101_at	9201	AT4G25000	AMY1 (ALPHA-AMYLASE-LIKE); alpha-amylase	0.616943	1.53362	7.27011	154.355	4.86128	0.000969874	0.00928361
254271_at	9371	AT4G23150	protein kinase family protein	0.616662	1.53332	4.73034	26.5444	5.26807	0.000565234	0.00623452
251621_at	6721	AT3G57700	protein kinase, putative	0.616661	1.53332	5.16384	35.8485	5.36337	0.00049977	0.00572293
260986_at	16086	AT1G53580	ETHE1/GLX2-3 (GLYOXALASE 2-3); hydroxyacylglutathione hydrolase	0.61639	1.53303	9.83121	910.939	10.5736	2.80648e-06	0.000168362
262374_s_at	17474	AT1G72910;AT1G72930	[AT1G72910, disease resistance protein (TIR-NBS class), putative];[AT1G72930, TIR (TOLL/INTERLEUKIN-1 RECEPTOR-LIKE); transmembrane receptor]	0.61434	1.53086	9.57174	760.993	4.20213	0.00244801	0.0181237
250360_at	5460	AT5G11360	ATP binding / protein kinase	0.61392	1.53041	6.43565	86.5615	6.76759	9.37532e-05	0.00171992
264843_at	19943	AT1G03400	2-oxoglutarate-dependent dioxygenase, putative	0.613543	1.53001	7.97441	251.499	7.46522	4.4593e-05	0.00105077
261711_at	16811	AT1G32700	zinc-binding family protein	0.613126	1.52957	10.5264	1474.94	10.6448	2.65678e-06	0.000164412
262099_s_at	17199	AT4G37390;AT1G59500	[AT4G37390, YDK1 (AUXIN UPREGULATED1, YADOKARI 1); indole-3-acetic acid amido synthetase];[AT1G59500, GH3.4; indole-3-acetic acid amido synthetase]	0.612688	1.52911	5.47709	44.5419	5.38981	0.000483102	0.00558518
258472_at	13572	AT3G06080	similar to unknown protein [Arabidopsis thaliana] (TAIR:AT5G19160.1); similar to expressed protein [Oryza sativa (japonica cultivar-group)] (GB:ABA91480.2); contains InterPro domain Protein of unknown function DUF231, plant; (InterPro:IPR004253)	0.612674	1.52909	8.84418	459.581	5.56247	0.000388031	0.00479468
263927_s_at	19027	AT2G21890;AT2G21730	[AT2G21890, mannitol dehydrogenase, putative];[AT2G21730, mannitol dehydrogenase, putative]	0.611651	1.52801	7.49727	180.677	6.87489	8.33331e-05	0.00158932
263827_at	18927	AT2G40420	amino acid transporter family protein	0.611488	1.52783	8.50254	362.676	9.16976	8.8852e-06	0.000359985
245330_at	430	AT4G14930	acid phosphatase survival protein SurE, putative	0.609988	1.52625	9.82318	905.882	9.07722	9.63556e-06	0.000382238
254948_at	10048	AT4G11000	ankyrin repeat family protein	0.609752	1.526	6.91806	120.933	4.52207	0.00154957	0.0129899
254492_at	9592	AT4G20260	DREPP plasma membrane polypeptide family protein	0.609615	1.52585	10.3954	1346.84	4.78815	0.00107145	0.00997136
263196_at	18296	AT1G36070	WD-40 repeat family protein	0.609549	1.52578	7.59077	192.774	4.82366	0.00102076	0.00960937
246034_at	1134	AT5G08350	GRAM domain-containing protein / ABA-responsive protein-related	0.609476	1.5257	8.87906	470.828	6.90027	8.10586e-05	0.00155898
246996_at	2096	AT5G67420	LOB domain protein 37 / lateral organ boundaries domain protein 37 (LBD37)	0.608946	1.52515	9.92768	973.935	9.70639	5.62513e-06	0.000277126
247921_at	3021	AT5G57660	zinc finger (B-box type) family protein	0.608772	1.52496	9.73893	854.494	8.91543	1.11214e-05	0.000412791
253281_at	8381	AT4G34138	UGT73B1 (UDP-glucosyl transferase 73B1); UDP-glycosyltransferase/ abscisic acid glucosyltransferase	0.60877	1.52496	7.97254	251.173	6.10011	0.000201248	0.00297784
266181_at	21281	AT2G02390	ATGSTZ1 (GLUTATHIONE S-TRANSFERASE 18); glutathione transferase	0.608596	1.52477	9.1546	569.915	10.0035	4.40729e-06	0.000234351
251426_at	6526	AT3G60180	uridylate kinase, putative / uridine monophosphate kinase, putative / UMP kinase, putative	0.608447	1.52462	8.13299	280.721	9.37398	7.44715e-06	0.000326046
254231_at	9331	AT4G23810	WRKY53 (WRKY DNA-binding protein 53); transcription factor	0.608403	1.52457	6.65072	100.477	5.34546	0.000511414	0.00582394
250690_at	5790	AT5G06530	ABC transporter family protein	0.60791	1.52405	10.488	1436.18	10.2534	3.60651e-06	0.000203625
262638_at	17738	AT1G06650	2-oxoglutarate-dependent dioxygenase, putative	0.607202	1.5233	8.47757	356.453	9.4006	7.27947e-06	0.000321792
263783_at	18883	AT2G46400	WRKY46 (WRKY DNA-binding protein 46); transcription factor	0.606748	1.52282	6.10092	68.6373	5.61733	0.000362247	0.00456936
247979_at	3079	AT5G56750	Ndr family protein	0.606097	1.52214	7.92741	243.439	7.73327	3.39827e-05	0.000888929
265481_at	20581	AT2G15960	unknown protein	0.605401	1.5214	9.52478	736.622	8.46469	1.67758e-05	0.000554609
262399_at	17499	AT1G49500	similar to unknown protein [Arabidopsis thaliana] (TAIR:AT3G19030.1)	0.604849	1.52082	10.7205	1687.34	8.97306	1.0565e-05	0.000400976
249415_at	4515	AT5G39660	CDF2 (CYCLING DOF FACTOR 2); DNA binding / protein binding / transcription factor	0.604647	1.52061	7.8571	231.858	8.77232	1.26482e-05	0.000453625
261674_at	16774	AT1G18270	ketose-bisphosphate aldolase class-II family protein	0.604621	1.52058	9.49987	724.013	11.1398	1.82979e-06	0.00013043
260875_at	15975	AT1G21410	F-box family protein	0.604618	1.52058	9.88433	945.101	10.6276	2.69202e-06	0.000165512
254229_at	9329	AT4G23610	similar to unknown protein [Arabidopsis thaliana] (TAIR:AT3G54200.1); similar to plant cell wall protein SlTFR88 [Lycopersicon esculentum] (GB:ABF39005.1)	0.604388	1.52033	4.97908	31.5392	3.91515	0.00373583	0.0246067
265768_at	20868	AT2G48020	sugar transporter, putative	0.604048	1.51998	9.80244	892.951	10.5958	2.75882e-06	0.000168011
258262_at	13362	AT3G15770	similar to unknown protein [Arabidopsis thaliana] (TAIR:AT5G25360.1); similar to hypothetical protein [Glycine max] (GB:AAN03467.1)	0.60203	1.51785	7.00009	128.008	5.20963	0.000609933	0.00657804
253317_at	8417	AT4G33960	similar to unknown protein [Arabidopsis thaliana] (TAIR:AT2G15830.1)	0.601959	1.51778	7.46699	176.925	11.1547	1.80982e-06	0.000129411
247199_at	2299	AT5G65210	bZIP family transcription factor (TGA1)	0.600872	1.51663	6.34367	81.2147	4.64777	0.00130003	0.0114827
264561_at	19661	AT1G55810	uracil phosphoribosyltransferase, putative / UMP pyrophosphorylase, putative / UPRTase, putative	0.600822	1.51658	9.04565	528.461	11.0061	2.02079e-06	0.000138069
248263_at	3363	AT5G53370	pectinesterase family protein	0.599702	1.5154	8.95004	494.573	10.2852	3.51674e-06	0.000199545
251195_at	6295	AT3G62930	glutaredoxin family protein	0.599342	1.51503	5.88496	59.0949	7.58869	3.93111e-05	0.000967299
267293_at	22393	AT2G23810	TET8 (TETRASPANIN8)	0.598659	1.51431	10.5573	1506.83	9.38779	7.35965e-06	0.000324707
265471_at	20571	AT2G37130	peroxidase 21 (PER21) (P21) (PRXR5)	0.598639	1.51429	5.24096	37.8169	5.57247	0.000383189	0.00475546
248124_at	3224	AT5G54730	AtATG18f (Arabidopsis thaliana homolog of yeast autophagy 18 (ATG18) f)	0.598453	1.51409	8.00498	256.885	7.55753	4.05759e-05	0.000985661
262733_s_at	17833	AT1G28660;AT1G28670	[AT1G28660, lipase, putative];[AT1G28670, ARAB-1 (Arabidopsis lipase); carboxylic ester hydrolase]	0.598252	1.51388	7.0068	128.605	7.26234	5.50474e-05	0.00121088
245760_s_at	860	AT1G66920;AT1G66910	[AT1G66920, serine/threonine protein kinase, putative];[AT1G66910, protein kinase, putative]	0.597944	1.51356	5.63476	49.6858	7.90732	2.8596e-05	0.000798377
254265_s_at	9365	AT4G23140;AT4G23160	[AT4G23140, CRK6 (CYSTEINE-RICH RLK 6); kinase];[AT4G23160, protein kinase family protein]	0.597834	1.51344	4.81531	28.1549	4.83694	0.00100247	0.00948786
263800_at	18900	AT2G24600	ankyrin repeat family protein	0.597191	1.51277	5.49864	45.2122	8.35313	1.86231e-05	0.000594115
253217_at	8317	AT4G34970	actin binding	0.596853	1.51241	5.7463	53.6796	8.33182	1.90009e-05	0.000601959
249769_at	4869	AT5G24120	SIGE (RNA polymerase sigma subunit E); DNA binding / DNA-directed RNA polymerase/ sigma factor/ transcription factor	0.596715	1.51227	7.85516	231.546	10.5942	2.76233e-06	0.000168011
249606_at	4706	AT5G37260	myb family transcription factor	0.596199	1.51173	10.0153	1034.93	8.38379	1.80941e-05	0.000582124
255723_at	10823	AT3G29575	similar to unknown protein [Arabidopsis thaliana] (TAIR:AT1G13740.1); similar to Os07g0602900 [Oryza sativa (japonica cultivar-group)] (GB:NP_001060209.1); similar to expressed protein [Oryza sativa (japonica cultivar-group)] (GB:ABF94628.1); similar to Os03g0419100 [Oryza sativa (japonica cultivar-group)] (GB:NP_001050378.1); contains InterPro domain Protein of unknown function DUF1675; (InterPr…	0.594214	1.50965	7.65287	201.254	10.6236	2.70042e-06	0.000165582
250972_at	6072	AT5G02840	myb family transcription factor	0.594204	1.50964	10.7584	1732.25	8.98557	1.04483e-05	0.000399968
255926_at	11026	AT1G22190	AP2 domain-containing transcription factor, putative	0.593841	1.50926	7.20698	147.747	10.0053	4.40076e-06	0.000234351
252004_at	7104	AT3G52780	ATPAP20/PAP20; acid phosphatase/ protein serine/threonine phosphatase	0.593578	1.50898	7.06216	133.635	4.50647	0.00158396	0.0131798
257615_at	12715	AT3G26510	octicosapeptide/Phox/Bem1p (PB1) domain-containing protein	0.592703	1.50807	11.5153	2927.28	10.9615	2.08925e-06	0.000140438
261585_at	16685	AT1G01010	ANAC001 (Arabidopsis NAC domain containing protein 1); transcription factor	0.592522	1.50788	6.31386	79.5537	10.1333	3.96912e-06	0.000219747
259187_at	14287	AT3G01530	AtMYB57 (myb domain protein 57); DNA binding / transcription factor	0.592251	1.5076	5.80575	55.9377	7.23257	5.67964e-05	0.00123619
267169_at	22269	AT2G37540	short-chain dehydrogenase/reductase (SDR) family protein	0.592222	1.50757	6.83299	114.008	5.08775	0.000715973	0.00746747
254835_s_at	9935	AT4G12320;AT4G12310	[AT4G12320, CYP706A6 (cytochrome P450, family 706, subfamily A, polypeptide 6); oxygen binding];[AT4G12310, CYP706A5 (cytochrome P450, family 706, subfamily A, polypeptide 5); oxygen binding]	0.591794	1.50712	5.62746	49.4349	7.45392	4.51142e-05	0.00105979
254016_at	9116	AT4G26150	zinc finger (GATA type) family protein	0.59041	1.50567	6.06449	66.9259	6.94739	7.70138e-05	0.00150788
253522_at	8622	AT4G31290	ChaC-like family protein	0.589336	1.50455	10.3593	1313.59	9.08534	9.56703e-06	0.000382179
267380_at	22480	AT2G26170	CYP711A1 (MORE AXILLARY BRANCHES 1); oxygen binding	0.588992	1.5042	8.07537	269.729	9.02833	1.00601e-05	0.000394957
248801_at	3901	AT5G47370	HAT2; transcription factor	0.588809	1.504	8.93649	489.95	8.67418	1.38285e-05	0.000486771
265189_at	20289	AT1G23840	similar to unknown protein [Arabidopsis thaliana] (TAIR:AT1G23830.1)	0.586985	1.5021	5.2252	37.406	5.51954	0.000409601	0.00497233
256050_at	11150	AT1G07000	ATEXO70B2 (exocyst subunit EXO70 family protein B2); protein binding	0.586673	1.50178	6.58477	95.9871	9.62634	6.01385e-06	0.000285632
255794_at	10894	AT2G33480	ANAC041 (Arabidopsis NAC domain containing protein 41); transcription factor	0.5865	1.5016	8.52925	369.453	7.71295	3.4681e-05	0.00090019
246219_at	1319	AT4G36760	ATAPP1 (aminopeptidase P1)	0.586119	1.5012	10.0429	1054.94	9.34554	7.63108e-06	0.000330027
261663_at	16763	AT1G18330	EPR1 (EARLY-PHYTOCHROME-RESPONSIVE1); DNA binding / transcription factor	0.585937	1.50101	8.67274	408.088	10.324	3.4106e-06	0.000195467
256930_at	12030	AT3G22460	cysteine synthase, putative / O-acetylserine (thiol)-lyase, putative / O-acetylserine sulfhydrylase, putative	0.585306	1.50036	5.93055	60.9921	4.77732	0.00108744	0.0100668
257556_at	12656	no_match	no_match	0.585218	1.50027	5.42744	43.0351	5.78035	0.000296009	0.0039439
265176_at	20276	AT1G23520	similar to unknown protein [Arabidopsis thaliana] (TAIR:AT1G23600.1); similar to OBP32pep (GB:AAA79703.1); contains InterPro domain Protein of unknown function DUF220; (InterPro:IPR003863)	-0.585427	0.666452	7.79755	222.482	-5.63336	0.000355067	0.00449698
255471_at	10571	AT4G03050	AOP3 (2-oxoglutarate?dependent dioxygenase 3); oxidoreductase, acting on paired donors, with incorporation or reduction of molecular oxygen, 2-oxoglutarate as one donor, and incorporation of one atom each of oxygen into both donors	-0.585436	0.666448	10.5986	1550.63	-8.88078	1.14715e-05	0.000424091
263034_at	18134	AT1G24020	Bet v I allergen family protein	-0.585483	0.666426	13.2233	9563.58	-8.38081	1.81447e-05	0.000582931
247313_at	2413	AT5G63980	SAL1 (FIERY1); 3'(2'),5'-bisphosphate nucleotidase/ inositol or phosphatidylinositol phosphatase	-0.585556	0.666392	9.82306	905.807	-8.98845	1.04216e-05	0.000399968
267440_at	22540	AT2G19070	transferase family protein	-0.586124	0.66613	10.0508	1060.67	-8.037	2.51936e-05	0.000732992
256509_at	11609	AT1G75300	isoflavone reductase, putative	-0.58664	0.665892	7.45845	175.881	-5.59327	0.000373319	0.00466814
267298_at	22398	AT2G23760	BLH4 (BLH4); DNA binding / transcription factor	-0.587867	0.665326	7.40893	169.946	-8.47339	1.66405e-05	0.000553308
259165_at	14265	AT3G01470	ATHB-1 (Homeobox-leucine zipper protein HAT5); transcription factor	-0.588598	0.664989	8.51852	366.717	-7.60605	3.86253e-05	0.000962889
266226_at	21326	AT2G28740	HIS4 (Histone H4)	-0.58862	0.664979	9.48845	718.305	-9.31942	7.80439e-06	0.000332744
253757_at	8857	AT4G28950	ARAC7/ATROP9/RAC7/ROP9 (rho-related protein from plants 9); GTP binding	-0.590026	0.664331	6.75674	108.139	-8.50887	1.61008e-05	0.000540882
247377_at	2477	AT5G63180	pectate lyase family protein	-0.590539	0.664095	7.44511	174.262	-7.26621	5.48248e-05	0.00120988
266009_at	21109	AT2G37420	kinesin motor protein-related	-0.591329	0.663731	6.63079	99.0985	-6.539	0.000121046	0.00205589
247040_at	2140	AT5G67150	transferase family protein	-0.593877	0.66256	8.74523	429.117	-8.17668	2.20196e-05	0.000668797
250207_at	5307	AT5G13930	CHS (CHALCONE SYNTHASE); naringenin-chalcone synthase	-0.595151	0.661975	12.7157	6726.57	-9.44286	7.02175e-06	0.000315396
251067_at	6167	AT5G01910	unknown protein	-0.595512	0.66181	6.72762	105.978	-9.30213	7.92149e-06	0.000337107
262675_at	17775	AT1G75930	EXL6 (extracellular lipase 6); acyltransferase/ carboxylic ester hydrolase/ lipase	-0.595921	0.661622	11.8232	3623.68	-8.93229	1.09554e-05	0.000409659
245622_at	722	AT4G14080	MEE48 (maternal effect embryo arrest 48); hydrolase, hydrolyzing O-glycosyl compounds	-0.596966	0.661143	10.7238	1691.14	-7.72528	3.42555e-05	0.000895038
266663_at	21763	AT2G25790	leucine-rich repeat transmembrane protein kinase, putative	-0.597298	0.660991	7.79509	222.104	-6.83731	8.68305e-05	0.00163596
250815_s_at	5915	AT5G05040;AT5G05060	[AT5G05040, cysteine protease inhibitor];[AT5G05060, similar to cysteine protease inhibitor [Arabidopsis thaliana] (TAIR:AT5G05040.1); contains InterPro domain Arabidopsis thaliana cystatin-related protein; (InterPro:IPR006525)]	-0.597729	0.660793	9.00983	515.502	-8.59239	1.49052e-05	0.000510897
261222_at	16322	AT1G20120	family II extracellular lipase, putative	-0.597964	0.660686	10.2476	1215.77	-8.09453	2.38291e-05	0.000704982
252973_s_at	8073	AT4G38740	ROC1 (rotamase CyP 1); peptidyl-prolyl cis-trans isomerase	-0.598271	0.660545	12.9378	7846.17	-9.20618	8.60771e-06	0.000353769
265118_at	20218	AT1G62660	beta-fructosidase (BFRUCT3) / beta-fructofuranosidase / invertase, vacuolar	-0.598503	0.660439	8.4756	355.967	-10.1131	4.03428e-06	0.00022174
263706_s_at	18806	AT1G31180;AT5G14200	[AT1G31180, 3-isopropylmalate dehydrogenase, chloroplast, putative];[AT5G14200, 3-isopropylmalate dehydrogenase, chloroplast, putative]	-0.598764	0.660319	8.82608	453.853	-8.37244	1.8288e-05	0.000585882
263382_at	18482	AT2G40230	transferase family protein	-0.598767	0.660318	7.2234	149.438	-7.63185	3.76301e-05	0.000949494
252011_at	7111	AT3G52720	carbonic anhydrase family protein	-0.599007	0.660208	6.30158	78.8796	-9.22492	8.4687e-06	0.00035186
250636_at	5736	AT5G07520	GRP18 (Glycine rich protein 18); nutrient reservoir	-0.599456	0.660003	9.70447	834.326	-7.61003	3.84699e-05	0.000962542
247030_at	2130	AT5G67210	nucleic acid binding / pancreatic ribonuclease	-0.601181	0.659214	7.08436	135.708	-4.34017	0.00200601	0.0156918
250794_at	5894	AT5G05270	chalcone-flavanone isomerase family protein	-0.601448	0.659092	9.58059	765.676	-9.89444	4.81667e-06	0.000251016
261051_at	16151	AT1G01280	CYP703A2 (cytochrome P450, family 703, subfamily A, polypeptide 2); oxygen binding	-0.601478	0.659079	8.75275	431.361	-8.63035	1.43943e-05	0.000499748
260297_at	15397	AT1G80280	hydrolase, alpha/beta fold family protein	-0.601665	0.658993	10.4641	1412.57	-9.5296	6.52374e-06	0.000299409
265053_at	20153	AT1G52000	jacalin lectin family protein	-0.601767	0.658946	8.26281	307.152	-6.48861	0.000128166	0.00213704
246814_at	1914	AT5G27200	ACP5 (ACYL CARRIER PROTEIN 5); acyl carrier	-0.602178	0.658759	7.28828	156.311	-7.37865	4.87603e-05	0.0011191
263031_at	18131	AT1G24070	ATCSLA10 (Cellulose synthase-like A10); transferase, transferring glycosyl groups	-0.603733	0.658049	8.66071	404.702	-6.44736	0.000134337	0.00222046
260461_at	15561	AT1G10980	similar to unknown protein [Arabidopsis thaliana] (TAIR:AT1G61670.1); similar to 12246 (GB:AAD21413.1); contains InterPro domain Lung seven transmembrane receptor; (InterPro:IPR009637)	-0.604501	0.657699	8.36116	328.82	-9.25966	8.21751e-06	0.000345833
262595_at	17695	AT1G15360	SHN1/WIN1 (SHINE1); DNA binding / transcription factor	-0.604661	0.657626	9.53224	740.441	-5.05279	0.000749955	0.00773698
261921_at	17021	AT1G65900	similar to Putative reverse transcriptase [Oryza sativa (japonica cultivar-group)] (GB:AAO15295.1); contains domain "Helical backbone" metal receptor (SSF53807)	-0.608043	0.656086	8.78389	440.773	-9.578	6.26289e-06	0.00029334
266401_s_at	21501	AT2G38620;AT3G54180	[AT2G38620, CDKB1;2 (cyclin-dependent kinase B1;2); kinase];[AT3G54180, CDC2B (CDC2-LIKE GENE); kinase]	-0.608171	0.656028	7.26941	154.281	-10.4505	3.08827e-06	0.000183446
251827_at	6927	AT3G55120	TT5 (TRANSPARENT TESTA 5); chalcone isomerase	-0.609416	0.655462	10.8098	1795.05	-10.2113	3.72939e-06	0.000209011
260077_at	15177	AT1G73620	thaumatin-like protein, putative / pathogenesis-related protein, putative	-0.609532	0.655409	8.37847	332.791	-7.09966	6.53836e-05	0.00135582
262436_at	17536	AT1G47610	transducin family protein / WD-40 repeat family protein	-0.613292	0.653703	7.19395	146.418	-8.53055	1.57807e-05	0.000534855
250344_at	5444	AT5G11930	glutaredoxin family protein	-0.613967	0.653398	5.89494	59.505	-3.76291	0.00469665	0.0289307
266139_at	21239	AT2G28085	auxin-responsive family protein	-0.614958	0.652949	6.79947	111.39	-8.06166	2.45984e-05	0.000721196
262212_at	17312	AT1G74890	ARR15 (RESPONSE REGULATOR 15); transcription regulator	-0.615168	0.652854	5.80597	55.9461	-5.79228	0.000291705	0.00389794
256060_at	11160	AT1G07050	CONSTANS-like protein-related	-0.616169	0.652401	6.17992	72.5005	-7.18238	5.98842e-05	0.00127914
250304_at	5404	AT5G12110	elongation factor 1B alpha-subunit 1 (eEF1Balpha1)	-0.616271	0.652355	8.18774	291.578	-11.4892	1.41866e-06	0.000110443
247639_s_at	2739	AT5G60500;AT5G60510	[AT5G60500, undecaprenyl pyrophosphate synthetase family protein / UPP synthetase family protein];[AT5G60510, undecaprenyl pyrophosphate synthetase family protein / UPP synthetase family protein]	-0.616432	0.652282	8.4298	344.844	-11.3793	1.53577e-06	0.000116653
258459_at	13559	AT3G17290	0	-0.617428	0.651832	5.3888	41.8976	-7.24508	5.60542e-05	0.00122189
254085_at	9185	AT4G24960	ATHVA22D (Arabidopsis thaliana HVA22 homologue D)	-0.617865	0.651635	10.4622	1410.67	-7.75611	3.32159e-05	0.000876915
249214_at	4314	AT5G42720	glycosyl hydrolase family 17 protein	-0.61805	0.651551	7.57777	191.046	-7.50973	4.2604e-05	0.0010208
253804_at	8904	AT4G28230	unknown protein	-0.618918	0.651159	7.25508	152.756	-8.93014	1.09763e-05	0.000409771
247691_at	2791	AT5G59720	HSP18.2 (HEAT SHOCK PROTEIN 18.2)	-0.619429	0.650929	5.57045	47.5194	-7.26588	5.48437e-05	0.00120988
266201_at	21301	AT2G39060	nodulin MtN3 family protein	-0.619815	0.650754	5.2824	38.9189	-3.42682	0.00786783	0.0419507
248073_at	3173	AT5G55720	pectate lyase family protein	-0.62129	0.65009	10.4787	1426.92	-5.49458	0.000422741	0.00508046
260001_at	15101	AT1G67990	caffeoyl-CoA 3-O-methyltransferase, putative	-0.621474	0.650006	11.75	3444.37	-9.24148	8.34792e-06	0.000347849
266118_at	21218	AT2G02130	LCR68/PDF2.3 (Low-molecular-weight cysteine-rich 68); protease inhibitor	-0.622748	0.649433	11.992	4073.3	-7.14637	6.22131e-05	0.00130791
246498_at	1598	AT5G16235;AT5G16230	[AT5G16230, acyl-(acyl-carrier-protein) desaturase, putative / stearoyl-ACP desaturase, putative]	-0.622914	0.649358	5.36856	41.314	-7.28468	5.37738e-05	0.00119433
259346_at	14446	AT3G03910	glutamate dehydrogenase, putative	-0.624886	0.648471	8.05939	266.759	-7.1805	6.00033e-05	0.00127914
252983_at	8083	AT4G37980	ELI3-1 (ELICITOR-ACTIVATED GENE 3); oxidoreductase/ zinc ion binding	-0.625494	0.648198	10.2243	1196.28	-7.04196	6.9547e-05	0.0014164
251952_at	7052	AT3G53650	histone H2B, putative	-0.625567	0.648165	6.03182	65.4273	-6.85619	8.5054e-05	0.00161003
264962_at	20062	AT1G77110	PIN6 (PIN-FORMED 6); auxin:hydrogen symporter/ transporter	-0.625628	0.648138	7.7345	212.97	-9.56521	6.33071e-06	0.000295304
250251_at	5351	AT5G13670	nodulin MtN21 family protein	-0.625784	0.648067	5.38299	41.7293	-9.48928	6.75022e-06	0.000306108
248839_at	3939	AT5G46690	BHLH071 (BETA HLH PROTEIN 71); DNA binding / transcription factor	-0.626136	0.647909	7.38306	166.925	-7.82761	3.09364e-05	0.00083609
253177_s_at	8277	AT4G35150;AT4G35160	[AT4G35150, O-methyltransferase family 2 protein];[AT4G35160, O-methyltransferase family 2 protein]	-0.627713	0.647202	5.47023	44.3305	-5.52383	0.000407392	0.0049587
261580_at	16680	AT1G01110	IQD18 (IQ-domain 18)	-0.62887	0.646683	7.11754	138.865	-9.25075	8.28116e-06	0.000346303
263452_at	18552	AT2G22190	trehalose-phosphatase	-0.632363	0.645119	7.10826	137.974	-9.58236	6.23999e-06	0.000292869
261500_at	16600	AT1G28400	similar to unknown protein [Arabidopsis thaliana] (TAIR:AT2G33850.1); similar to unknown [Brassica napus] (GB:AAC06020.1)	-0.633761	0.644494	9.74872	860.313	-8.64352	1.42217e-05	0.000497388
254574_at	9674	AT4G19430	unknown protein	-0.634121	0.644333	10.9928	2037.85	-6.44832	0.000134189	0.00221962
250638_at	5738	AT5G07540	GRP16 (Glycine rich protein 16); nutrient reservoir	-0.637562	0.642798	10.139	1127.57	-9.26407	8.18622e-06	0.000345792
257642_at	12742	AT3G25710	basic helix-loop-helix (bHLH) family protein	-0.638718	0.642284	7.33823	161.818	-5.80026	0.000288866	0.00387351
247425_at	2525	AT5G62550	similar to unknown protein [Arabidopsis thaliana] (TAIR:AT3G28770.1); similar to unnamed protein product; gene_id:K19B1.16 unknown protein-related [Medicago truncatula] (GB:ABE84483.1)	-0.638853	0.642223	8.26455	307.522	-6.77023	9.34813e-05	0.0017198
263134_at	18234	AT1G78570	RHM1/ROL1 (RHAMNOSE BIOSYNTHESIS1); UDP-glucose 4,6-dehydratase/ catalytic	-0.640417	0.641528	11.4014	2705	-10.3551	3.32812e-06	0.000192188
266223_at	21323	AT2G28790	osmotin-like protein, putative	-0.640513	0.641485	12.6372	6370.74	-8.1292	2.30462e-05	0.00069078
263971_at	19071	AT2G42800	leucine-rich repeat family protein	-0.641394	0.641093	9.08605	543.466	-8.49291	1.63412e-05	0.000547094
261149_s_at	16249	AT1G19570;AT1G19550	[AT1G19570, DHAR1 (DEHYDROASCORBATE REDUCTASE); glutathione dehydrogenase (ascorbate)];[AT1G19550, dehydroascorbate reductase, putative]	-0.64184	0.640895	12.9172	7734.92	-9.37584	7.43529e-06	0.000326046
261055_at	16155	AT1G01300	aspartyl protease family protein	-0.641941	0.64085	11.5869	3076.22	-6.89685	8.13607e-05	0.00156153
263599_at	18699	AT2G01830	WOL (CYTOKININ RESPONSE 1)	-0.642379	0.640656	7.39227	167.995	-8.29371	1.96977e-05	0.000618025
248623_at	3723	AT5G49170	similar to unknown protein [Arabidopsis thaliana] (TAIR:AT3G06840.1)	-0.642784	0.640476	6.84687	115.11	-7.10904	6.47331e-05	0.00134676
262912_at	18012	AT1G59740	proton-dependent oligopeptide transport (POT) family protein	-0.644683	0.639633	8.94715	493.585	-6.64044	0.000107988	0.00189478
254100_at	9200	AT4G25020	KOW domain-containing protein / D111/G-patch domain-containing protein	-0.645756	0.639158	7.41885	171.119	-10.8836	2.21516e-06	0.000146034
267364_at	22464	AT2G40080	ELF4 (EARLY FLOWERING 4)	-0.646414	0.638866	7.27679	155.072	-9.86141	4.94885e-06	0.00025367
248793_at	3893	AT5G47240	ATNUDT8 (Arabidopsis thaliana Nudix hydrolase homolog 8); hydrolase	-0.646681	0.638748	8.13257	280.638	-7.52119	4.21079e-05	0.00101103
246418_at	1518	AT5G16960	NADP-dependent oxidoreductase, putative	-0.648291	0.638036	10.5535	1502.83	-7.1513	6.18885e-05	0.0013059
249303_at	4403	AT5G41460	fringe-related protein	-0.649191	0.637638	8.34072	324.195	-11.7384	1.1881e-06	0.000100746
254109_at	9209	AT4G25240	SKS1 (SKU5 SIMILAR 1); copper ion binding	-0.650347	0.637127	7.73582	213.164	-5.5557	0.000391353	0.00483019
262312_at	17412	AT1G70830	Bet v I allergen family protein	-0.650447	0.637083	12.0423	4217.88	-9.48619	6.76789e-06	0.000306301
256626_at	11726	AT3G20015	pepsin A	-0.650752	0.636948	8.55339	375.687	-10.9804	2.05996e-06	0.000139446
257314_at	12414	AT3G26590	MATE efflux family protein	-0.65083	0.636914	7.46308	176.445	-9.02163	1.01198e-05	0.000395941
263373_at	18473	AT2G20515	similar to Os04g0517000 [Oryza sativa (japonica cultivar-group)] (GB:NP_001053317.1); similar to OSJNBa0073E02.5 [Oryza sativa (japonica cultivar-group)] (GB:CAE05445.2); similar to OSIGBa0145M07.3 [Oryza sativa (indica cultivar-group)] (GB:CAH67221.1)	-0.651154	0.636771	8.05673	266.266	-9.01415	1.0187e-05	0.000396924
262616_at	17716	AT1G06620	2-oxoglutarate-dependent dioxygenase, putative	-0.651345	0.636687	5.85565	57.9064	-4.15147	0.00263545	0.0190648
248333_at	3433	AT5G52390	photoassimilate-responsive protein, putative	-0.652261	0.636282	8.09143	272.749	-5.33694	0.000517059	0.00587649
253800_at	8900	AT4G28160	hydroxyproline-rich glycoprotein family protein	-0.655489	0.63486	6.69699	103.751	-5.60738	0.00036678	0.0046019
266418_at	21518	AT2G38750	ANNAT4 (ANNEXIN 4, ANNEXIN ARABIDOPSIS 4); calcium ion binding / calcium-dependent phospholipid binding	-0.657117	0.634144	8.33092	322	-7.53885	4.13554e-05	0.0009987
265530_at	20630	AT2G06050	OPR3 (OPDA-REDUCTASE 3); 12-oxophytodienoate reductase	-0.65758	0.633941	7.46983	177.273	-7.33806	5.08603e-05	0.00114917
255644_at	10744	AT4G00870	basic helix-loop-helix (bHLH) family protein	-0.659135	0.633258	7.92682	243.338	-10.4007	3.21103e-06	0.000187804
251346_at	6446	AT3G60980	pentatricopeptide (PPR) repeat-containing protein	-0.659508	0.633094	6.9053	119.868	-8.97817	1.05172e-05	0.000400495
263011_at	18111	AT1G23250	caleosin-related	-0.663408	0.631385	6.48975	89.8687	-7.24929	5.58066e-05	0.00122047
257467_at	12567	AT1G31320	LOB domain protein 4 / lateral organ boundaries domain protein 4 (LBD4)	-0.663522	0.631335	6.51848	91.6764	-8.0176	2.56729e-05	0.000742203
252944_at	8044	AT4G39320	microtubule-associated protein-related	-0.663559	0.631319	5.79155	55.3897	-6.0822	0.000205572	0.00302132
260233_at	15333	AT1G74550	CYP98A9 (cytochrome P450, family 98, subfamily A, polypeptide 9); oxygen binding	-0.66706	0.629789	8.89121	474.811	-8.00009	2.61144e-05	0.00074929
264260_at	19360	AT1G09210	calreticulin 2 (CRT2)	-0.66815	0.629313	11.7495	3443.21	-10.6782	2.58952e-06	0.000163241
247252_at	2352	AT5G64770	similar to 80C09_10 [Brassica rapa subsp. pekinensis] (GB:AAZ41821.1)	-0.669632	0.628667	5.02417	32.5406	-7.81285	3.13925e-05	0.000845935
248496_at	3596	AT5G50790	nodulin MtN3 family protein	-0.674193	0.626682	10.1759	1156.81	-6.62407	0.000109987	0.00191658
254490_at	9590	AT4G20320	CTP synthase	-0.674225	0.626669	9.68296	821.981	-10.1291	3.98283e-06	0.000219972
251178_at	6278	AT3G63440;AT3G63445	[AT3G63440, ATCKX6/ATCKX7/CKX6 (CYTOKININ OXIDASE/DEHYDROGENASE 6); cytokinin dehydrogenase]	-0.674365	0.626608	6.68543	102.924	-9.65096	5.89123e-06	0.000282797
245133_at	233	AT2G45310;AT2G45315	[AT2G45310, GAE4 (UDP-D-GLUCURONATE 4-EPIMERASE 4); catalytic]	-0.676288	0.625773	7.29308	156.833	-6.91807	7.95041e-05	0.00153838
254389_s_at	9489	AT4G21910;AT4G21900	[AT4G21910, MATE efflux family protein];[AT4G21900, MATE efflux family protein]	-0.676951	0.625486	9.22021	596.431	-8.83263	1.19783e-05	0.000439036
265277_at	20377	AT2G28410	similar to unknown protein [Arabidopsis thaliana] (TAIR:AT5G60650.1)	-0.677506	0.625245	8.69579	414.66	-10.8038	2.35308e-06	0.000152916
246705_x_at	1805	AT5G28120;AT5G28110	[AT5G28120, similar to unknown protein [Arabidopsis thaliana] (TAIR:AT5G28110.1)];[AT5G28110, similar to unknown protein [Arabidopsis thaliana] (TAIR:AT5G28120.1)]	-0.68069	0.623867	4.81608	28.1699	-6.72903	9.78401e-05	0.00176701
254349_at	9449	AT4G22250	zinc finger (C3HC4-type RING finger) family protein	-0.681036	0.623717	6.85709	115.929	-7.5233	4.2017e-05	0.00101098
250566_at	5666	AT5G08070	TCP17 (TCP domain protein 17); transcription factor	-0.681212	0.623641	5.40145	42.2666	-8.19466	2.1644e-05	0.000660904
245842_at	942	AT1G58430	RXF26; carboxylic ester hydrolase	-0.681623	0.623463	11.8097	3589.78	-6.68694	0.000102525	0.00183276
256017_at	11117	AT1G19180	similar to unknown protein [Arabidopsis thaliana] (TAIR:AT1G74950.1); similar to PnFL-2 [Ipomoea nil] (GB:AAG49896.1); contains InterPro domain ZIM; (InterPro:IPR010399)	-0.681729	0.623418	8.95141	495.042	-8.93285	1.09499e-05	0.000409659
248614_at	3714	AT5G49560	similar to unknown protein [Arabidopsis thaliana] (TAIR:AT3G50850.1); similar to hypothetical protein [Neurospora crassa OR74A] (GB:XP_965011.1); similar to conserved hypothetical protein [Neurospora crassa] (GB:CAE76456.1); similar to Os07g0569500 [Oryza sativa (japonica cultivar-group)] (GB:NP_001060038.1); contains domain no description (G3D.3.40.50.150); contains domain S-adenosyl-L-methionin…	-0.683405	0.622694	6.8996	119.395	-7.94263	2.7622e-05	0.000778681
249916_at	5016	AT5G22880	histone H2B, putative	-0.683523	0.622643	9.98915	1016.33	-9.35573	7.56458e-06	0.000329653
250149_at	5249	AT5G14700	cinnamoyl-CoA reductase-related	-0.683759	0.622541	8.12138	278.471	-9.71411	5.58913e-06	0.000276108
261653_at	16753	AT1G01900	subtilase family protein	-0.6845	0.622221	8.12065	278.33	-6.95249	7.6589e-05	0.00150382
258003_at	13103	AT3G29030	ATEXPA5 (ARABIDOPSIS THALIANA EXPANSIN A5)	-0.685386	0.621839	9.58755	769.377	-5.70372	0.000325336	0.00422123
267153_at	22253	AT2G30860	ATGSTF9 (Arabidopsis thaliana Glutathione S-transferase (class phi) 9); glutathione transferase	-0.685425	0.621823	13.2598	9808.51	-9.64881	5.90178e-06	0.000282797
250669_at	5769	AT5G06870	PGIP2 (POLYGALACTURONASE INHIBITING PROTEIN 2); protein binding	-0.685761	0.621678	10.1741	1155.36	-6.80413	9.00533e-05	0.0016741
266516_at	21616	AT2G47880	glutaredoxin family protein	-0.685934	0.621603	6.58092	95.7311	-7.59068	3.92318e-05	0.000967154
247933_at	3033	AT5G56980	similar to unknown protein [Arabidopsis thaliana] (TAIR:AT4G26130.1); similar to cDNA-5-encoded protein (GB:AAA50235.1)	-0.686451	0.62138	6.32945	80.4182	-10.9763	2.06633e-06	0.000139446
267123_at	22223	AT2G23560	hydrolase, alpha/beta fold family protein	-0.686511	0.621355	6.03106	65.3929	-6.4347	0.000136295	0.00223661
259635_at	14735	AT1G56360	ATPAP6/PAP6 (purple acid phosphatase 6); acid phosphatase/ protein serine/threonine phosphatase	-0.687967	0.620728	8.28482	311.874	-3.36568	0.00865477	0.0450359
247191_at	2291	AT5G65310	ATHB5 (ARABIDOPSIS THALIANA HOMEOBOX PROTEIN 5); transcription factor	-0.689114	0.620234	8.64933	401.521	-11.2212	1.72335e-06	0.00012519
263063_s_at	18163	AT2G18150;AT2G18140	[AT2G18150, peroxidase, putative];[AT2G18140, peroxidase, putative]	-0.691324	0.619285	6.30364	78.9923	-6.12508	0.000195385	0.00291862
267064_at	22164	AT2G41110	ATCAL4 (calmodulin-related protein 4); calcium ion binding	-0.691957	0.619014	9.28866	625.412	-11.2543	1.68212e-06	0.000123771
250933_at	6033	AT5G03170	FLA11 (fasciclin-like arabinogalactan-protein 11)	-0.692075	0.618963	9.13866	563.652	-8.16763	2.22112e-05	0.000671044
255104_at	10204	AT4G08685	SAH7	-0.693343	0.618419	11.5831	3068.12	-11.2911	1.63745e-06	0.000121662
254338_s_at	9438	AT4G22080;AT4G22090	[AT4G22080, pectate lyase family protein];[AT4G22090, pectate lyase family protein]	-0.693654	0.618286	7.43806	173.412	-7.72304	3.43324e-05	0.000896019
250269_at	5369	AT5G12970	C2 domain-containing protein	-0.694108	0.618092	6.62736	98.8627	-6.64611	0.000107306	0.00188925
252077_at	7177	AT3G51720	similar to unknown protein [Arabidopsis thaliana] (TAIR:AT2G38370.1); similar to putative myosin heavy chain [Dendrobium grex Madame Thong-In] (GB:AAD20814.1); similar to Os07g0677900 [Oryza sativa (japonica cultivar-group)] (GB:NP_001060633.1); similar to Os03g0339700 [Oryza sativa (japonica cultivar-group)] (GB:NP_001050061.1); contains InterPro domain Protein of unknown function DUF827, plant;…	-0.694185	0.618058	8.78121	439.955	-12.6543	6.36487e-07	6.48137e-05
250091_at	5191	AT5G17340	similar to unknown protein [Arabidopsis thaliana] (TAIR:AT3G03272.1); similar to M3.4 protein [Brassica napus] (GB:AAD24197.1)	-0.695207	0.61762	9.34537	650.483	-4.0635	0.00299819	0.0208566
260241_at	15341	AT1G63710	CYP86A7 (cytochrome P450, family 86, subfamily A, polypeptide 7); oxygen binding	-0.696879	0.616905	10.3971	1348.45	-7.26586	5.4845e-05	0.00120988
261318_at	16418	AT1G53035	similar to unknown protein [Arabidopsis thaliana] (TAIR:AT3G15358.1); similar to unknown [Musa acuminata] (GB:ABC41688.1)	-0.69828	0.616306	7.37284	165.747	-6.67558	0.000103831	0.00184894
252248_at	7348	AT3G49750	leucine-rich repeat family protein	-0.698338	0.616282	6.94331	123.068	-9.12216	9.26275e-06	0.000371978
254754_at	9854	AT4G13210	pectate lyase family protein	-0.699845	0.615638	6.55376	93.9463	-4.96045	0.000848394	0.00843218
261840_at	16940	AT1G16070	AtTLP8 (TUBBY LIKE PROTEIN 8); transcription factor	-0.699893	0.615618	7.23155	150.284	-9.09441	9.49106e-06	0.000379809
259845_at	14945	AT1G73590	PIN1 (PIN-FORMED 1); transporter	-0.70009	0.615534	8.19997	294.061	-11.5205	1.38718e-06	0.000109486
259852_at	14952	AT1G72280	AERO1 (ARABIDOPSIS ENDOPLASMIC RETICULUM OXIDOREDUCTINS 1)	-0.701811	0.6148	7.02702	130.42	-11.341	1.57901e-06	0.000119025
261037_at	16137	AT1G17420	LOX3 (Lipoxygenase 3); iron ion binding / lipoxygenase	-0.702354	0.614568	7.07526	134.855	-4.73429	0.00115357	0.0105041
254670_at	9770	AT4G18390	TCP family transcription factor, putative	-0.703659	0.614013	8.70984	418.72	-9.16645	8.91083e-06	0.000360383
245138_at	238	AT2G45190	AFO (ABNORMAL FLORAL ORGANS); transcription factor	-0.705255	0.613334	9.65348	805.355	-11.1344	1.83716e-06	0.000130547
245607_at	707	AT4G14330	phragmoplast-associated kinesin-related protein 2 (PAKRP2)	-0.705607	0.613184	7.43698	173.282	-5.85268	0.000270947	0.00370964
262717_s_at	17817	AT1G16410;AT1G16400	[AT1G16410, CYP79F1 (SUPERSHOOT 1)];[AT1G16400, CYP79F2 (cytochrome P450, family 79, subfamily F, polypeptide 2); oxygen binding]	-0.705905	0.613058	4.82725	28.3888	-9.5328	6.50611e-06	0.000299409
245343_at	443	AT4G15830	binding	-0.709131	0.611688	9.24549	606.975	-8.98342	1.04683e-05	0.000399968
256418_at	11518	AT3G06160	transcriptional factor B3 family protein	-0.711263	0.610785	6.89006	118.608	-6.4965	0.000127022	0.00212262
254090_at	9190	AT4G25010	nodulin MtN3 family protein	-0.711598	0.610643	7.75531	216.063	-3.63476	0.0057081	0.0334108
267590_at	22690	AT2G39700	ATEXPA4 (ARABIDOPSIS THALIANA EXPANSIN A4)	-0.712808	0.610131	9.50226	725.215	-10.2221	3.69757e-06	0.000207738
245196_at	296	AT1G67750	pectate lyase family protein	-0.713522	0.609829	10.2178	1190.86	-12.2274	8.46935e-07	7.97307e-05
253475_at	8575	AT4G32290	similar to unknown protein [Arabidopsis thaliana] (TAIR:AT5G25330.1); similar to Os12g0618800 [Oryza sativa (japonica cultivar-group)] (GB:NP_001067294.1); similar to expressed protein [Oryza sativa (japonica cultivar-group)] (GB:AAT77886.1); similar to Os03g0648100 [Oryza sativa (japonica cultivar-group)] (GB:NP_001050776.1); contains InterPro domain Protein of unknown function DUF266, plant; (I…	-0.713785	0.609719	8.10379	275.095	-7.95487	2.7293e-05	0.000773471
252863_at	7963	AT4G39800	MI-1-P SYNTHASE (Myo-inositol-1-phosphate synthase); inositol-3-phosphate synthase	-0.715563	0.608968	9.88673	946.677	-11.8874	1.07028e-06	9.28253e-05
262949_at	18049	AT1G75790	SKS18 (SKU5 Similar 18); copper ion binding / pectinesterase	-0.715591	0.608955	8.22405	299.011	-6.23341	0.000172017	0.002644
259753_at	14853	AT1G71050	heavy-metal-associated domain-containing protein / copper chaperone (CCH)-related	-0.721577	0.606434	8.17061	288.136	-10.1931	3.78398e-06	0.000211273
266352_at	21452	AT2G01610	invertase/pectin methylesterase inhibitor family protein	-0.722316	0.606123	8.61667	392.532	-11.3392	1.58108e-06	0.000119025
249245_at	4345	AT5G42280	DC1 domain-containing protein	-0.723972	0.605428	5.52422	46.021	-3.66122	0.00548184	0.032436
250920_at	6020	AT5G03390	similar to unknown protein [Arabidopsis thaliana] (TAIR:AT1G68960.1); contains InterPro domain Protein of unknown function DUF295; (InterPro:IPR005174)	-0.725531	0.604774	8.11411	277.07	-10.3781	3.26827e-06	0.000190177
250661_at	5761	AT5G07030	pepsin A	-0.728244	0.603638	11.9947	4080.97	-11.6691	1.24771e-06	0.000102544
264187_at	19287	AT1G54860	similar to unknown protein [Arabidopsis thaliana] (TAIR:AT5G19250.1); similar to conserved hypothetical protein [Medicago truncatula] (GB:ABD32399.1)	-0.731338	0.602345	8.62963	396.075	-6.25688	0.000167367	0.00258473
256128_at	11228	AT1G18140	LAC1 (Laccase 1); copper ion binding / oxidoreductase	-0.731471	0.60229	5.70693	52.2344	-8.17277	2.21022e-05	0.000669522
262369_at	17469	AT1G73010	phosphoric monoester hydrolase	-0.732535	0.601846	6.73424	106.465	-6.77012	9.34922e-05	0.0017198
253087_at	8187	AT4G36350	ATPAP25/PAP25 (purple acid phosphatase 25); acid phosphatase/ protein serine/threonine phosphatase	-0.733252	0.601547	8.33953	323.928	-4.28882	0.00215956	0.0166025
261203_at	16303	AT1G12845	similar to hypothetical protein MtrDRAFT_AC149131g9v1 [Medicago truncatula] (GB:ABD32556.1)	-0.73326	0.601543	8.99045	508.624	-10.5576	2.84144e-06	0.000169668
261804_at	16904	AT1G30530	UDP-glucoronosyl/UDP-glucosyl transferase family protein	-0.73377	0.60133	10.3077	1267.4	-11.901	1.06014e-06	9.22969e-05
260788_at	15888	AT1G06260	cysteine proteinase, putative	-0.73844	0.599387	10.8618	1860.88	-5.40376	0.000474548	0.00550727
261159_s_at	16259	AT1G34460;AT5G06150	[AT1G34460, cyclin, putative];[AT5G06150, CYC1BAT (CYCLIN B 1;2); cyclin-dependent protein kinase regulator]	-0.739998	0.59874	8.39565	336.776	-7.38916	4.82325e-05	0.00111408
255876_at	10976	AT2G40480	similar to unknown protein [Arabidopsis thaliana] (TAIR:AT3G56270.1); similar to putative myosin heavy chain [Dendrobium grex Madame Thong-In] (GB:AAD20814.1); similar to Os07g0677900 [Oryza sativa (japonica cultivar-group)] (GB:NP_001060633.1); similar to Os03g0339700 [Oryza sativa (japonica cultivar-group)] (GB:NP_001050061.1); contains InterPro domain Protein of unknown function DUF827, plant;…	-0.740662	0.598465	7.39412	168.21	-10.6665	2.61283e-06	0.000163732
265025_at	20125	AT1G24575	unknown protein	-0.741241	0.598225	9.07814	540.494	-6.15997	0.000187502	0.00283239
247478_at	2578	AT5G62360	invertase/pectin methylesterase inhibitor family protein	-0.743638	0.597232	10.5192	1467.54	-9.68926	5.70588e-06	0.000277508
255786_at	10886	AT1G19670	ATCLH1 (CORONATINE-INDUCED PROTEIN 1)	-0.745668	0.596392	10.4448	1393.75	-9.72892	5.52075e-06	0.000274354
266358_at	21458	AT2G32280	similar to unknown protein [Arabidopsis thaliana] (TAIR:AT4G21310.1); similar to Os07g0545100 [Oryza sativa (japonica cultivar-group)] (GB:NP_001059913.1); similar to Os05g0435100 [Oryza sativa (japonica cultivar-group)] (GB:NP_001055641.1); similar to hypothetical protein [Oryza sativa (japonica cultivar-group)] (GB:AAT47054.1); contains InterPro domain Protein of unknown function DUF1218; (Inte…	-0.746608	0.596003	7.39194	167.956	-12.3502	7.7943e-07	7.51928e-05
249894_at	4994	AT5G22580	Identical to Protein At5g22580 [Arabidopsis Thaliana] (GB:Q9FK81); similar to stable protein 1-related [Arabidopsis thaliana] (TAIR:AT3G17210.1); similar to hypothetical protein [Cucumis melo] (GB:BAD93607.1); contains InterPro domain Stress responsive alpha-beta barrel; (InterPro:IPR013097); contains InterPro domain Dimeric alpha-beta barrel; (InterPro:IPR011008)	-0.748843	0.595081	10.8137	1799.93	-9.2496	8.2894e-06	0.000346303
255517_at	10617	AT4G02290	glycosyl hydrolase family 9 protein	-0.749361	0.594867	11.4504	2798.5	-11.7063	1.21534e-06	0.000101919
250561_at	5661	AT5G08030	glycerophosphoryl diester phosphodiesterase family protein	-0.750287	0.594485	7.38731	167.418	-4.08494	0.00290515	0.0204268
260041_at	15141	AT1G68780	leucine-rich repeat family protein	-0.757761	0.591413	8.38516	334.337	-8.12678	2.30999e-05	0.000691366
257633_at	12733	AT3G26125	CYP86C2 (cytochrome P450, family 86, subfamily C, polypeptide 2); oxygen binding	-0.760385	0.590339	9.90665	959.837	-8.13244	2.29744e-05	0.000689534
265897_at	20997	AT2G25680	sulfate transporter	-0.762701	0.589392	6.79723	111.216	-10.7298	2.48933e-06	0.000159499
252123_at	7223	AT3G51240	F3H (TRANSPARENT TESTA 6); naringenin 3-dioxygenase	-0.764033	0.588848	11.3439	2599.37	-11.5663	1.34243e-06	0.000107832
257254_at	12354	AT3G21950	S-adenosyl-L-methionine:carboxyl methyltransferase family protein	-0.765232	0.588359	5.94196	61.4762	-9.55056	6.40936e-06	0.000297754
248963_at	4063	AT5G45700	NLI interacting factor (NIF) family protein	-0.765553	0.588228	8.16617	287.251	-9.89403	4.81827e-06	0.000251016
246494_at	1594	AT5G16190	ATCSLA11 (Cellulose synthase-like A11); transferase, transferring glycosyl groups	-0.765908	0.588083	6.7955	111.083	-7.83993	3.05613e-05	0.000829827
261059_at	16159	AT1G01250	AP2 domain-containing transcription factor, putative	-0.768509	0.587024	6.81374	112.497	-8.28143	1.99282e-05	0.000620987
254234_at	9334	AT4G23680	major latex protein-related / MLP-related	-0.769998	0.586418	11.0589	2133.36	-8.79457	1.23963e-05	0.00044808
253258_at	8358	AT4G34400	DNA binding / transcription factor	-0.7755	0.584186	8.62651	395.218	-12.5567	6.78929e-07	6.85238e-05
247549_at	2649	AT5G61420	MYB28 (myb domain protein 28); DNA binding / transcription factor	-0.779203	0.582689	9.12675	559.016	-11.0965	1.88934e-06	0.00013139
247546_at	2646	AT5G61605	similar to unknown protein [Arabidopsis thaliana] (TAIR:AT2G16505.1)	-0.783669	0.580887	8.75275	431.361	-9.19988	8.65499e-06	0.000355073
245819_at	919	AT1G26310	CAL (CAULIFLOWER); DNA binding / transcription factor	-0.785091	0.580315	6.06344	66.877	-6.19514	0.000179904	0.00275041
254789_at	9889	AT4G12880	plastocyanin-like domain-containing protein	-0.786246	0.579851	10.1791	1159.38	-12.4926	7.08459e-07	7.05674e-05
262939_s_at	18039	AT1G79530;AT1G16300	[AT1G79530, GAPCP-1; glyceraldehyde-3-phosphate dehydrogenase];[AT1G16300, GAPCP-2; glyceraldehyde-3-phosphate dehydrogenase]	-0.790689	0.578068	8.34572	325.32	-14.1602	2.48101e-07	3.43088e-05
264899_at	19999	AT1G23130	Bet v I allergen family protein	-0.79094	0.577967	9.24087	605.033	-9.69261	5.68998e-06	0.000277508
260399_at	15499	AT1G72520	lipoxygenase, putative	-0.792146	0.577484	7.4637	176.522	-6.28198	0.000162547	0.00252397
250045_at	5145	AT5G17700	MATE efflux family protein	-0.794494	0.576545	7.52838	184.616	-11.5021	1.40557e-06	0.000110443
263753_at	18853	AT2G21490	dehydrin family protein	-0.796019	0.575936	9.05181	530.723	-9.41401	7.19658e-06	0.000320145
251706_at	6806	AT3G56620	integral membrane family protein / nodulin MtN21-related	-0.797022	0.575536	6.88269	118.004	-7.66601	3.63558e-05	0.00092553
259640_at	14740	AT1G52400	BGL1 (BETA-GLUCOSIDASE HOMOLOG 1); hydrolase, hydrolyzing O-glycosyl compounds	-0.799197	0.574669	12.1777	4632.75	-6.67484	0.000103917	0.00184894
258204_at	13304	AT3G13960	AtGRF5 (GROWTH-REGULATING FACTOR 5)	-0.799755	0.574447	7.49041	179.821	-12.0293	9.69937e-07	8.67618e-05
256489_at	11589	AT1G31550	GDSL-motif lipase, putative	-0.80152	0.573745	8.27932	310.688	-14.4437	2.09941e-07	3.08194e-05
245928_s_at	1028	AT5G24770;AT5G24780	[AT5G24770, VSP2 (VEGETATIVE STORAGE PROTEIN 2); acid phosphatase];[AT5G24780, VSP1 (VEGETATIVE STORAGE PROTEIN 1); acid phosphatase]	-0.804288	0.572645	13.5958	12380.9	-9.82936	5.08092e-06	0.000258696
251394_at	6494	AT3G60900	FLA10 (fasciclin-like arabinogalactan-protein 10)	-0.809387	0.570624	7.48448	179.083	-13.925	2.85641e-07	3.76617e-05
249761_at	4861	AT5G23970	transferase family protein	-0.810641	0.570128	7.7341	212.911	-7.76233	3.30104e-05	0.000875118
256062_at	11162	AT1G07090	similar to unknown protein [Arabidopsis thaliana] (TAIR:AT5G58500.1); similar to hypothetical protein [Oryza sativa (japonica cultivar-group)] (GB:BAB68109.1); contains InterPro domain Protein of unknown function DUF640; (InterPro:IPR006936)	-0.817897	0.567268	7.25614	152.868	-13.8365	3.0136e-07	3.95059e-05
252363_at	7463	AT3G48460	GDSL-motif lipase/hydrolase family protein	-0.820646	0.566188	10.2999	1260.58	-8.62682	1.4441e-05	0.000500204
257570_at	12670	AT3G13662	disease resistance-responsive protein-related / dirigent protein-related	-0.820954	0.566067	6.12891	69.9818	-8.41739	1.75332e-05	0.000570516
267295_at	22395	AT2G23800	GGPS2 (GERANYLGERANYL PYROPHOSPHATE SYNTHASE 2); farnesyltranstransferase	-0.82127	0.565943	9.1993	587.85	-11.7086	1.21336e-06	0.000101919
265058_s_at	20158	AT1G52030;AT1G52040	[AT1G52030, MBP2 (MYROSINASE-BINDING PROTEIN 2)];[AT1G52040, MBP1 (MYROSINASE-BINDING PROTEIN 1)]	-0.831557	0.561922	11.9464	3946.59	-7.44986	4.53029e-05	0.00106203
249025_at	4125	AT5G44720	molybdenum cofactor sulfurase family protein	-0.834138	0.560918	9.41094	680.733	-10.0592	4.21311e-06	0.000228269
251106_at	6206	AT5G01500	mitochondrial substrate carrier family protein	-0.840369	0.558501	8.81221	449.511	-9.90448	4.77726e-06	0.000250504
255604_at	10704	AT4G01080	similar to unknown protein [Arabidopsis thaliana] (TAIR:AT1G01430.1); similar to unknown protein Cr17 [Brassica napus] (GB:AAX51387.1); contains InterPro domain Protein of unknown function DUF231, plant; (InterPro:IPR004253)	-0.852816	0.553703	10.6685	1627.54	-10.0034	4.40757e-06	0.000234351
263477_at	18577	AT2G31790	UGT74C1: UDP-glucoronosyl/UDP-glucosyl transferase family protein	-0.855528	0.552663	9.13794	563.372	-13.1657	4.57141e-07	5.2096e-05
249046_at	4146	AT5G44400	FAD-binding domain-containing protein	-0.857208	0.55202	10.1769	1157.55	-7.0823	6.66065e-05	0.00137617
263092_at	18192	AT2G16210	transcriptional factor B3 family protein	-0.859916	0.550985	7.58082	191.449	-8.68656	1.36731e-05	0.00048429
245029_at	129	AT2G26580	plant-specific transcription factor YABBY family protein	-0.861662	0.550318	5.66511	50.742	-10.3374	3.37487e-06	0.00019424
258938_at	14038	AT3G10080	germin-like protein, putative	-0.863179	0.54974	9.46149	705.006	-11.5624	1.34615e-06	0.000107832
250471_at	5571	AT5G10170	inositol-3-phosphate synthase, putative / myo-inositol-1-phosphate synthase, putative / MI-1-P synthase, putative	-0.863574	0.549589	6.84555	115.005	-12.2551	8.31167e-07	7.86677e-05
251560_at	6660	AT3G57920	squamosa promoter-binding protein, putative	-0.865	0.549046	6.5414	93.1443	-10.397	3.22022e-06	0.00018786
250155_at	5255	AT5G15160	bHLH family protein	-0.868575	0.547688	6.62836	98.9317	-8.36007	1.85019e-05	0.000591075
252916_at	8016	AT4G38950	kinesin motor family protein	-0.873293	0.545899	7.4348	173.02	-8.33362	1.89686e-05	0.000601771
251012_at	6112	AT5G02580	similar to unknown protein [Arabidopsis thaliana] (TAIR:AT3G55240.1); similar to Os03g0280400 [Oryza sativa (japonica cultivar-group)] (GB:NP_001049737.1); similar to Os05g0462000 [Oryza sativa (japonica cultivar-group)] (GB:NP_001055765.1); similar to Os01g0837600 [Oryza sativa (japonica cultivar-group)] (GB:NP_001044739.1); contains InterPro domain Conserved hypothetical protein 1589, plant; (I…	-0.878082	0.54409	6.76529	108.781	-5.9557	0.000239162	0.00337789
251982_at	7082	AT3G53190	pectate lyase family protein	-0.87861	0.543891	10.7297	1698.07	-13.3092	4.17495e-07	4.95992e-05
253581_at	8681	AT4G30660	hydrophobic protein, putative / low temperature and salt responsive protein, putative	-0.884428	0.541702	10.6869	1648.44	-10.6916	2.56299e-06	0.000162394
263544_at	18644	AT2G21590	APL4 (large subunit of AGP 4); glucose-1-phosphate adenylyltransferase	-0.886971	0.540748	6.8781	117.629	-9.63121	5.98935e-06	0.000285213
253697_at	8797	AT4G29700	type I phosphodiesterase/nucleotide pyrophosphatase family protein	-0.888728	0.54009	8.10746	275.796	-7.99767	2.6176e-05	0.000750094
249920_at	5020	AT5G19260	similar to unknown protein [Arabidopsis thaliana] (TAIR:AT3G06020.1); similar to hypothetical protein 12 [Plantago major] (GB:CAJ34820.1)	-0.891776	0.53895	6.77215	109.3	-8.97033	1.05906e-05	0.000401283
250823_at	5923	AT5G05180	similar to unknown protein [Arabidopsis thaliana] (TAIR:AT3G10880.1); similar to Os05g0168800 [Oryza sativa (japonica cultivar-group)] (GB:NP_001054757.1); similar to Os01g0168100 [Oryza sativa (japonica cultivar-group)] (GB:NP_001042126.1); similar to tRNA-binding arm [Medicago truncatula] (GB:ABE94140.1)	-0.892623	0.538634	6.83594	114.241	-9.28084	8.06838e-06	0.000341447
254377_at	9477	AT4G21650	subtilase family protein	-0.89396	0.538135	6.47692	89.0733	-6.91858	7.94599e-05	0.00153838
259381_s_at	14481	AT3G16410;AT3G16390;AT3G16400	[AT3G16410,AtNSP4; jacalin lectin family protein];[AT3G16400, ATMLP-470 (MYROSINASE-BINDING PROTEIN-LIKE PROTEIN-470)]	-0.894152	0.538063	8.43901	347.053	-9.24024	8.35691e-06	0.000347849
266419_at	21519	AT2G38760	ANNAT3 (ANNEXIN 3, ANNEXIN ARABIDOPSIS 3); calcium ion binding / calcium-dependent phospholipid binding	-0.895787	0.537454	6.90501	119.844	-11.1594	1.80359e-06	0.000129411
267112_at	22212	AT2G14750	APK1 (APS KINASE1); ATP binding / kinase/ transferase, transferring phosphorus-containing groups	-0.898401	0.536481	8.76552	435.196	-9.66665	5.81452e-06	0.0002804
263714_at	18814	AT2G20610	SUR1 (SUPERROOT 1); transaminase	-0.898855	0.536312	9.39242	672.046	-12.4822	7.13425e-07	7.07531e-05
264830_at	19930	AT1G03710	similar to unknown protein [Arabidopsis thaliana] (TAIR:AT4G03565.1); contains InterPro domain Arabidopsis thaliana cystatin-related protein; (InterPro:IPR006525)	-0.904878	0.534078	7.98368	253.12	-7.54488	4.11019e-05	0.000996317
255595_at	10695	AT4G01700	chitinase, putative	-0.905069	0.534007	6.93874	122.679	-12.1569	8.88599e-07	8.22774e-05
246344_at	1444	AT3G56730	similar to unknown protein [Arabidopsis thaliana] (TAIR:AT3G62050.1); similar to Os07g0637200 [Oryza sativa (japonica cultivar-group)] (GB:NP_001060400.1); contains InterPro domain Protein of unknown function DUF537; (InterPro:IPR007491)	-0.908057	0.532902	5.81146	56.1596	-10.8587	2.25727e-06	0.000147831
245422_at	522	AT4G17470	palmitoyl protein thioesterase family protein	-0.909475	0.532379	5.57459	47.6561	-11.6847	1.234e-06	0.000102476
249732_at	4832	AT5G24420	glucosamine/galactosamine-6-phosphate isomerase-related	-0.912125	0.531402	11.8723	3749.03	-8.03938	2.51355e-05	0.000732992
252200_at	7300	AT3G50280	transferase family protein	-0.916225	0.529894	7.83741	228.716	-9.21364	8.55211e-06	0.000352755
266996_at	22096	AT2G34490	CYP710A2 (cytochrome P450, family 710, subfamily A, polypeptide 2); C-22 sterol desaturase/ oxygen binding	-0.917851	0.529297	8.3854	334.392	-14.4783	2.0575e-07	3.08194e-05
254232_at	9332	AT4G23600	CORI3 (CORONATINE INDUCED 1, JASMONIC ACID RESPONSIVE 2); transaminase	-0.920438	0.528349	11.504	2904.34	-10.7612	2.4304e-06	0.000157047
259609_at	14709	AT1G52410	TSA1 (TSK-ASSOCIATING PROTEIN 1); calcium ion binding / protein binding	-0.922768	0.527496	10.3766	1329.47	-6.17068	0.000185151	0.00280729
264166_at	19266	AT1G65370	meprin and TRAF homology domain-containing protein / MATH domain-containing protein	-0.934454	0.52324	8.19294	292.631	-8.40325	1.77669e-05	0.000575503
252005_at	7105	AT3G52810	ATPAP21/PAP21 (purple acid phosphatase 21); acid phosphatase/ protein serine/threonine phosphatase	-0.936959	0.522333	7.828	227.228	-11.2313	1.71072e-06	0.000124756
257191_at	12291	AT3G13175	similar to unknown protein [Arabidopsis thaliana] (TAIR:AT4G16400.1)	-0.940848	0.520926	8.61109	391.017	-15.8	9.82894e-08	1.83769e-05
256125_at	11225	AT1G18250	ATLP-1 (Arabidopsis thaumatin-like protein 1)	-0.942713	0.520253	10.4883	1436.47	-12.3107	8.00455e-07	7.67159e-05
266766_at	21866	AT2G46880	ATPAP14/PAP14; acid phosphatase/ protein serine/threonine phosphatase	-0.9429	0.520186	6.75032	107.659	-6.72505	9.82735e-05	0.00177343
261368_at	16468	AT1G53070	legume lectin family protein	-0.947487	0.518535	9.46439	706.422	-17.3483	4.43879e-08	1.17394e-05
265261_at	20361	AT2G42990	GDSL-motif lipase/hydrolase family protein	-0.956394	0.515343	10.23	1200.96	-9.66132	5.84043e-06	0.000281055
256976_at	12076	AT3G21020	0	-0.960686	0.513813	5.78885	55.2861	-10.6583	2.62937e-06	0.000163869
251778_at	6878	AT3G55660	ATROPGEF6/ROPGEF6 (KINASE PARTNER PROTEIN-LIKE); Rho guanyl-nucleotide exchange factor	-0.971192	0.510084	6.7878	110.492	-16.4538	6.96604e-08	1.49901e-05
256781_at	11881	AT3G13650	disease resistance response	-0.971271	0.510057	8.0704	268.802	-10.7958	2.36726e-06	0.000153401
256307_at	11407	AT1G30350	pectate lyase family protein	-0.972999	0.509446	8.20231	294.538	-9.33112	7.72621e-06	0.000330647
262637_at	17737	AT1G06640	2-oxoglutarate-dependent dioxygenase, putative	-0.973875	0.509137	7.25053	152.274	-14.1597	2.48177e-07	3.43088e-05
247760_at	2860	AT5G59130	subtilase family protein	-0.975262	0.508648	6.07479	67.4055	-15.6079	1.09026e-07	1.96246e-05
261264_at	16364	AT1G26710	similar to unknown protein [Arabidopsis thaliana] (TAIR:AT1G26720.1)	-0.985523	0.505043	7.74131	213.977	-6.54233	0.000120591	0.00204968
259403_at	14503	AT1G17745	PGDH (3-PHOSPHOGLYCERATE DEHYDROGENASE); phosphoglycerate dehydrogenase	-0.992798	0.502502	10.7368	1706.46	-13.2916	4.22157e-07	4.97222e-05
260022_at	15122	AT1G30020;AT1G30010	[AT1G30020, similar to unknown protein [Arabidopsis thaliana] (TAIR:AT5G46230.1); similar to hypothetical protein [Oryza sativa (japonica cultivar-group)] (GB:BAC10815.1); similar to Os01g0210600 [Oryza sativa (japonica cultivar-group)] (GB:NP_001042369.1); similar to hypothetical protein [Oryza sativa (japonica cultivar-group)] (GB:BAC15900.1); contains InterPro domain Protein of unknown functio…	-0.997895	0.50073	10.5359	1484.68	-13.8005	3.08029e-07	3.98793e-05
246002_at	1102	AT5G20740	invertase/pectin methylesterase inhibitor family protein	-1.00881	0.496955	11.1991	2351.04	-16.7664	5.93569e-08	1.41034e-05
252102_at	7202	AT3G50970	LTI30/XERO2 (LOW TEMPERATURE-INDUCED 30)	-1.02415	0.491699	7.36067	164.355	-14.3945	2.16074e-07	3.13927e-05
247463_at	2563	AT5G62210	embryo-specific protein-related	-1.0307	0.489473	10.9615	1994.12	-13.6156	3.44971e-07	4.29988e-05
265984_at	21084	AT2G24210	TPS10 (TERPENE SYNTHASE 10); myrcene/(E)-beta-ocimene synthase	-1.04179	0.485724	7.4131	170.437	-6.02663	0.000219647	0.00316097
262819_at	17919	AT1G11600	CYP77B1 (cytochrome P450, family 77, subfamily B, polypeptide 1); oxygen binding	-1.04249	0.48549	8.64836	401.252	-12.6593	6.34376e-07	6.48137e-05
257170_at	12270	AT3G23770	glycosyl hydrolase family 17 protein	-1.04575	0.484392	8.67623	409.077	-6.50275	0.000126123	0.0021169
259383_at	14483	AT3G16470	JR1 (Jacalin lectin family protein)	-1.04638	0.484183	12.2108	4740.39	-8.04697	2.49512e-05	0.000728729
260955_at	16055	AT1G06000	UDP-glucoronosyl/UDP-glucosyl transferase family protein	-1.05044	0.482822	9.54439	746.702	-16.8667	5.6419e-08	1.35465e-05
265083_at	20183	AT1G03820	similar to unknown protein [Arabidopsis thaliana] (TAIR:AT2G33850.1); similar to arabinogalactan-protein; AGP [Pyrus communis] (GB:AAB35283.1)	-1.0535	0.481798	7.78249	220.173	-10.571	2.81218e-06	0.000168362
264873_at	19973	AT1G24100	UGT74B1 (UDP-glucosyl transferase 74B1); UDP-glycosyltransferase/ thiohydroximate beta-D-glucosyltransferase/ transferase, transferring glycosyl groups	-1.08106	0.47268	9.15725	570.96	-16.197	7.96204e-08	1.6072e-05
267425_at	22525	AT2G34810	FAD-binding domain-containing protein	-1.08187	0.472415	9.88228	943.762	-10.7303	2.4884e-06	0.000159499
263161_at	18261	AT1G54020	myrosinase-associated protein, putative	-1.08232	0.472267	5.73022	53.0846	-7.17371	6.04363e-05	0.00128476
259802_at	14902	AT1G72260	THI2.1 (THIONIN 2.1); toxin receptor binding	-1.08338	0.471923	10.9871	2029.78	-6.75936	9.46102e-05	0.00173199
252114_at	7214	AT3G51450	strictosidine synthase family protein	-1.10806	0.463917	8.01839	259.284	-16.131	8.24295e-08	1.64931e-05
263497_at	18597	AT2G42540	COR15A (COLD-REGULATED 15A)	-1.11673	0.461138	10.359	1313.3	-16.0357	8.66828e-08	1.67809e-05
257017_at	12117	AT3G19620	glycosyl hydrolase family 3 protein	-1.12512	0.458465	7.05019	132.531	-11.4985	1.40924e-06	0.000110443
263153_s_at	18253	AT1G54000;AT1G54010	[AT1G54000, myrosinase-associated protein, putative];[AT1G54010, myrosinase-associated protein, putative]	-1.13605	0.455003	7.70954	209.316	-12.304	8.04099e-07	7.67427e-05
258470_at	13570	AT3G06035	Identical to Putative GPI-anchored protein At3g06035 precursor [Arabidopsis Thaliana] (GB:Q84MC0;GB:Q8H7F7;GB:Q8L9J0); similar to unknown protein [Arabidopsis thaliana] (TAIR:AT5G19250.1); similar to Os07g0645000 [Oryza sativa (japonica cultivar-group)] (GB:NP_001060451.1); similar to unknown protein [Oryza sativa (japonica cultivar-group)] (GB:BAC07018.1); contains domain PR-1-like (SSF55797)	-1.15074	0.450394	9.8955	952.453	-20.9139	8.95868e-09	4.45356e-06
263320_at	18420	AT2G47180	ATGOLS1 (ARABIDOPSIS THALIANA GALACTINOL SYNTHASE 1); transferase, transferring hexosyl groups	-1.1511	0.450283	7.58765	192.359	-8.45635	1.69067e-05	0.000557287
261033_at	16133	AT1G17380	similar to unknown protein [Arabidopsis thaliana] (TAIR:AT1G72450.1); similar to PnFL-2 [Ipomoea nil] (GB:AAG49896.1); similar to Os07g0615200 [Oryza sativa (japonica cultivar-group)] (GB:NP_001060268.1); similar to Os03g0402800 [Oryza sativa (japonica cultivar-group)] (GB:NP_001050322.1); contains InterPro domain ZIM; (InterPro:IPR010399)	-1.15329	0.449597	8.2216	298.502	-8.62605	1.44513e-05	0.000500204
261618_at	16718	AT1G33110	MATE efflux family protein	-1.17632	0.44248	6.73707	106.674	-18.5664	2.48655e-08	8.34093e-06
249383_at	4483	AT5G39860	PRE1 (PACLOBUTRAZOL RESISTANCE1); DNA binding / transcription factor	-1.17814	0.44192	6.54642	93.4692	-14.5429	1.98175e-07	3.08194e-05
245538_at	638	AT4G15200	formin homology 2 domain-containing protein / FH2 domain-containing protein	-1.19778	0.435945	5.47203	44.386	-11.409	1.50306e-06	0.000115084
260547_at	15647	AT2G43550	trypsin inhibitor, putative	-1.22091	0.429013	12.0305	4183.53	-9.73915	5.47409e-06	0.000272915
248863_at	3963	AT5G46750	AGD8 (ARF-GAP DOMAIN 8); DNA binding	-1.23563	0.424657	10.3652	1318.95	-21.2224	7.89917e-09	4.45356e-06
266353_at	21453	AT2G01520	major latex protein-related / MLP-related	-1.24971	0.420531	9.56622	758.087	-17.3385	4.46026e-08	1.17394e-05
252023_at	7123	AT3G52920	similar to unknown protein [Arabidopsis thaliana] (TAIR:AT2G36410.1); similar to Os04g0408600 [Oryza sativa (japonica cultivar-group)] (GB:NP_001052720.1); similar to hypothetical protein [Ipomoea trifida] (GB:AAS79606.1); similar to OSJNBa0042I15.15 [Oryza sativa (japonica cultivar-group)] (GB:CAE04893.2); contains InterPro domain Protein of unknown function DUF662; (InterPro:IPR007033)	-1.25135	0.420056	9.24592	607.157	-18.8748	2.15963e-08	7.57865e-06
264987_at	20087	AT1G27030	similar to unknown protein [Arabidopsis thaliana] (TAIR:AT1G27020.1); similar to unknown protein [Oryza sativa (japonica cultivar-group)] (GB:AAN05517.1); similar to Os10g0463800 [Oryza sativa (japonica cultivar-group)] (GB:NP_001064789.1); contains domain GatB/YqeY domain (SSF89095)	-1.26077	0.417322	5.15142	35.5413	-14.2065	2.41375e-07	3.41973e-05
248841_at	3941	AT5G46740	UBP21 (UBIQUITIN-SPECIFIC PROTEASE 21); ubiquitin-specific protease	-1.28519	0.410318	8.3204	319.662	-16.7067	6.11869e-08	1.41806e-05
253815_at	8915	AT4G28250	ATEXPB3 (ARABIDOPSIS THALIANA EXPANSIN B3)	-1.29004	0.408939	9.56576	757.848	-23.6274	3.13346e-09	2.8147e-06
252827_at	7927	AT4G39950	CYP79B2 (cytochrome P450, family 79, subfamily B, polypeptide 2); oxygen binding	-1.2945	0.407677	7.40913	169.969	-7.3217	5.17343e-05	0.00116148
260385_at	15485	AT1G74090	SOT18; sulfotransferase family protein	-1.2979	0.406718	9.62825	791.393	-21.6353	6.69289e-09	4.4253e-06
267595_at	22695	AT2G32990	glycosyl hydrolase family 9 protein	-1.29921	0.406349	6.17235	72.1212	-11.683	1.23546e-06	0.000102476
260178_at	15278	AT1G70720	invertase/pectin methylesterase inhibitor family protein	-1.33425	0.396597	8.9856	506.914	-11.8238	1.11886e-06	9.63061e-05
248864_at	3964	AT5G46760	basic helix-loop-helix (bHLH) family protein	-1.33454	0.396517	9.55238	750.85	-21.3612	7.46876e-09	4.45356e-06
263431_at	18531	AT2G22170	lipid-associated family protein	-1.35005	0.392278	9.36836	660.934	-22.9194	4.07355e-09	3.12455e-06
263495_at	18595	AT2G42530	cold-responsive protein / cold-regulated protein (cor15b)	-1.36584	0.388007	10.0893	1089.37	-10.4319	3.13348e-06	0.000185167
259842_at	14942	AT1G73600	phosphoethanolamine N-methyltransferase 3, putative (NMT3)	-1.36605	0.387951	7.91306	241.028	-8.94071	1.08735e-05	0.000408606
248353_at	3453	AT5G52320	CYP96A4 (cytochrome P450, family 96, subfamily A, polypeptide 4); oxygen binding	-1.38616	0.382583	7.02187	129.955	-23.7976	2.94536e-09	2.79932e-06
260745_at	15845	AT1G78370	ATGSTU20 (Arabidopsis thaliana Glutathione S-transferase (class tau) 20); glutathione transferase	-1.3941	0.380482	11.7091	3348.11	-13.6428	3.3924e-07	4.27518e-05
254915_s_at	10015	AT4G11320;AT4G11310	[AT4G11320, cysteine proteinase, putative];[AT4G11310, RD21 (RESPONSIVE TO DEHYDRATION 21); cysteine-type peptidase]	-1.396	0.379982	9.2779	620.763	-9.18306	8.78272e-06	0.000357739
261913_at	17013	AT1G65860	FMO-GSOX1; flavin-containing monooxygenase family protein / FMO family protein	-1.40554	0.377477	6.12484	69.7846	-10.3352	3.38067e-06	0.00019424
253627_at	8727	AT4G30650	hydrophobic protein, putative / low temperature and salt responsive protein, putative	-1.41535	0.374919	9.4764	712.327	-23.3163	3.51304e-09	2.96787e-06
249540_at	4640	AT5G38120	4-coumarate--CoA ligase family protein / 4-coumaroyl-CoA synthase family protein	-1.41706	0.374475	8.14863	283.78	-10.9411	2.12149e-06	0.000141495
255773_at	10873	AT1G18590	SOT17; sulfotransferase family protein	-1.45124	0.365706	6.59636	96.7611	-9.05296	9.84371e-06	0.000387905
250633_at	5733	AT5G07460	PMSR2 (PEPTIDEMETHIONINE SULFOXIDE REDUCTASE 2); protein-methionine-S-oxide reductase	-1.45502	0.36475	7.87668	235.027	-11.6671	1.24951e-06	0.000102544
248337_at	3437	AT5G52310	COR78 (COLD REGULATED 78)	-1.4823	0.357919	9.60106	776.619	-11.168	1.79219e-06	0.000129367
249817_at	4917	AT5G23820	MD-2-related lipid recognition domain-containing protein / ML domain-containing protein	-1.49629	0.354463	7.60928	195.264	-17.7851	3.59041e-08	1.08883e-05
259878_at	14978	AT1G76790	O-methyltransferase family 2 protein	-1.50396	0.352584	7.40373	169.334	-14.2207	2.39346e-07	3.41218e-05
261150_at	16250	AT1G19640	JMT (JASMONIC ACID CARBOXYL METHYLTRANSFERASE); jasmonate O-methyltransferase	-1.55457	0.340429	6.48736	89.7199	-10.6587	2.6284e-06	0.000163869
264052_at	19152	AT2G22330	CYP79B3 (cytochrome P450, family 79, subfamily B, polypeptide 3); oxygen binding	-1.56172	0.338748	6.86975	116.95	-11.7456	1.18206e-06	0.000100607
254907_at	10007	AT4G11190	disease resistance-responsive family protein / dirigent family protein	-1.56197	0.338687	6.81911	112.916	-16.2188	7.87173e-08	1.6072e-05
253879_s_at	8979	AT4G27560;AT4G27570	[AT4G27560, glycosyltransferase family protein];[AT4G27570, glycosyltransferase family protein]	-1.5844	0.333464	9.57182	761.035	-21.155	8.11817e-09	4.45356e-06
254862_at	9962	AT4G12030	BAT5; bile acid:sodium symporter family protein	-1.64128	0.320573	6.99102	127.206	-19.9171	1.36254e-08	5.26773e-06
266989_at	22089	AT2G39330	jacalin lectin family protein	-1.7663	0.293962	9.3302	643.68	-7.68353	3.57206e-05	0.000917552
254687_at	9787	AT4G13770	CYP83A1 (CYTOCHROME P450 83A1); oxygen binding	-1.78585	0.290005	10.3198	1278.09	-11.9209	1.04559e-06	9.13793e-05
252870_at	7970	AT4G39940	AKN2 (APS-KINASE 2); ATP binding / kinase/ transferase, transferring phosphorus-containing groups	-1.79678	0.287817	8.91012	481.077	-11.2364	1.70429e-06	0.000124756
265121_at	20221	AT1G62560	FMO-GSOX3; flavin-containing monooxygenase family protein / FMO family protein	-1.80316	0.286547	6.47134	88.7292	-16.2088	7.91293e-08	1.6072e-05
261826_at	16926	AT1G11580	pectin methylesterase, putative	-1.85117	0.277167	7.63857	199.268	-16.5708	6.55877e-08	1.45248e-05
258897_at	13997	AT3G05730	Encodes a defensin-like (DEFL) family protein.	-1.89386	0.269086	6.16363	71.6865	-22.491	4.79272e-09	3.41631e-06
245537_at	637	no_match	no_match	-2.06037	0.239755	5.56628	47.3823	-21.0555	8.45396e-09	4.45356e-06
249866_at	4966	AT5G23010	MAM1 (2-isopropylmalate synthase 3); 2-isopropylmalate synthase	-2.06982	0.238189	6.74841	107.516	-7.17504	6.03511e-05	0.00128415
266326_at	21426	AT2G46650	B5 #1 (cytochrome b5 family protein #1); heme binding / transition metal ion binding	-2.10761	0.232032	8.79759	444.977	-17.086	5.05417e-08	1.26687e-05
258851_at	13951	AT3G03190	ATGSTF11 (GLUTATHIONE S-TRANSFERASE F11); glutathione transferase	-2.14207	0.226555	6.93058	121.987	-13.1891	4.50416e-07	5.18756e-05
257021_at	12121	AT3G19710	BCAT4 (BRANCHED-CHAIN AMINOTRANSFERASE4); catalytic/ methionine-oxo-acid transaminase	-2.25446	0.209575	7.47302	177.666	-9.72323	5.5469e-06	0.000275054
266395_at	21495	AT2G43100	IPMI1 SSU2; aconitase C-terminal domain-containing protein	-2.33418	0.198309	8.05338	265.65	-17.167	4.85451e-08	1.24417e-05
251524_at	6624	AT3G58990	IPMI SSU3; aconitase C-terminal domain-containing protein	-2.48314	0.178855	8.00879	257.564	-20.8406	9.23311e-09	4.45356e-06
245275_at	375	AT4G15210	ATBETA-AMY (BETA-AMYLASE); beta-amylase	-3.39698	0.0949306	8.43455	345.981	-17.2065	4.76043e-08	1.23393e-05
254452_at	9552	AT4G21100	DDB1B (DAMAGED DNA BINDING PROTEIN 1 B)	-3.79237	0.0721745	6.30603	79.1231	-42.381	1.96898e-11	1.49708e-07
